# Supplementary material
Source: PubMed Central journal article supplement (PMC4700510)
Supplement: NIHMS731485-supplement-3.pdf [file NIHMS731485-supplement-3.pdf]

|                  |                 | Brain region          | Brain 1<br># of<br>Samples | Brain 2<br># of<br>Samples | Brain 3<br># of<br>Samples | Brain 4<br># of<br>Samples | Brain 5<br># of<br>Samples | Brain 6<br># of<br>Samples                                                                                                                     | Sampled structures                                                                                                               | Isolation<br>Method |
|------------------|-----------------|-----------------------|----------------------------|----------------------------|----------------------------|----------------------------|----------------------------|------------------------------------------------------------------------------------------------------------------------------------------------|----------------------------------------------------------------------------------------------------------------------------------|---------------------|
| Telencephalon    | Cortex          | Frontal Cortex        | 149                        | 125                        | 43                         | 63                         | 58                         | 60                                                                                                                                             | Orbital gyri; superior, middle, and inferior frontal gyri; rostral and subcallosal gyri; precentral gyrus; paracentral lobule    | Macro               |
|                  |                 | Parietal Cortex       | 72                         | 55                         | 35                         | 39                         | 32                         | 39                                                                                                                                             | Superior and inferior parietal lobules; postcentral gyrus; paracentral lobule; precuneus                                         | Macro               |
|                  |                 | Temporal Cortex       | 153                        | 81                         | 35                         | 70                         | 48                         | 63                                                                                                                                             | Superior, middle, and inferior temporal gyri; fusiform gyrus; transverse gyri; planum temporale and planum polare; temporal pole | Macro               |
|                  |                 | Occipital Cortex      | 30                         | 45                         | 23                         | 38                         | 34                         | 35                                                                                                                                             | Striate and extra-striate cortex from the cuneus and lingual gyrus; occipito-temporal gyrus; lateral occipital gyri              | Macro               |
|                  |                 | Insula                | 11                         | 7                          | 4                          | 8                          | 7                          | 6                                                                                                                                              | Short and long insular gyri                                                                                                      | Macro               |
|                  |                 | Cingulate Gyrus       | 19                         | 27                         | 17                         | 22                         | 23                         | 20                                                                                                                                             | Anterior, posterior, and retrosplenial regions of the cingulate cortex                                                           | Macro               |
|                  |                 | Parahippocampal Gyrus | 14                         | 9                          | 7                          | 10                         | 10                         | 10                                                                                                                                             | Parahippocampal gyrus                                                                                                            | Macro               |
|                  |                 | Hippocampus           | 61                         | 54                         | 14                         | 22                         | 17                         | 20                                                                                                                                             | CA1-CA4 pyramidal cell layers; dentate gyrus; subiculum                                                                          | LMD                 |
|                  | Cerebral Nuclei | Striatum              | 47                         | 45                         | 16                         | 23                         | 18                         | 18                                                                                                                                             | Caudate nucleus; putamen; nucleus accumbens                                                                                      | Macro/ LMD          |
|                  |                 | Globus Pallidus       | 10                         | 14                         | 4                          | 1                          | 3                          | 5                                                                                                                                              | Globus pallidus                                                                                                                  | Macro/ LMD          |
|                  |                 | Basal Forebrain       | 7                          | 10                         | 7                          | 9                          | 6                          | 12                                                                                                                                             | Septal nuclei; cholinergic basal forebrain; bed nucleus of the stria terminalis                                                  | LMD                 |
|                  |                 | Clastrum              | 17                         | 11                         | 5                          | 7                          | 5                          | 2                                                                                                                                              | Clastrum                                                                                                                         | LMD                 |
|                  |                 | Amygdala              | 14                         | 22                         | 8                          | 6                          | 7                          | 10                                                                                                                                             | Lateral, basolateral, basomedial, central, and cortico-medial amygdalar nuclei; amygdaloid transition zone                       | LMD                 |
|                  | Diencephalon    | Dorsal Thalamus       | 47                         | 47                         | 21                         | 23                         | 16                         | 19                                                                                                                                             | Anterior, medial, lateral, posterior, and intralaminar nuclei of the thalamus; lateral and medial geniculate nuclei              | Macro/ LMD          |
| Ventral Thalamus |                 | 7                     | 10                         | 5                          | 5                          | 5                          | 2                          | Reticular nucleus and zona incerta                                                                                                             | LMD                                                                                                                              |                     |
| Subthalamus      |                 | 3                     | 3                          | 2                          | 2                          | 1                          | 3                          | Subthalamic nucleus                                                                                                                            | LMD                                                                                                                              |                     |
| Epithalamus      |                 | 8                     | 2                          | 2                          | 2                          | 0                          | 1                          | Habenular nuclei; paraventricular nucleus of the thalamus                                                                                      | LMD                                                                                                                              |                     |
| Hypothalamus     |                 | 9                     | 22                         | 17                         | 20                         | 16                         | 18                         | Anterior, lateral, posterior, and preoptic hypthalamic areas; paraventricular, supraoptic, ventromedial hypothalamic nuclei; mammillary bodies | LMD                                                                                                                              |                     |

|                   |  |                          |    |    |    |    |    |    |                                                                                                                                                                                                                                |       |
|-------------------|--|--------------------------|----|----|----|----|----|----|--------------------------------------------------------------------------------------------------------------------------------------------------------------------------------------------------------------------------------|-------|
|                   |  | <b>Mesencephelon</b>     | 44 | 61 | 9  | 22 | 24 | 18 | Cranial nerve nuclei 3 and 4; substantia nigra; red nucleus; ventral tegmental area; pretectal regions; midbrain raphe nuclei, superior and inferior colliculi                                                                 | LMD   |
| <b>Metencepha</b> |  | <b>Cerebellar Cortex</b> | 41 | 75 | 40 | 43 | 59 | 74 | Cortex from the lateral hemispheres, paravermis, and vermis                                                                                                                                                                    | Macro |
|                   |  | <b>Cerebellar Nuclei</b> | 12 | 7  | 2  | 4  | 2  | 4  | Deep cerebellar nuclei                                                                                                                                                                                                         | LMD   |
|                   |  | <b>Basal Pons</b>        | 12 | 12 | 4  | 7  | 8  | 5  | Pontine grey                                                                                                                                                                                                                   | LMD   |
|                   |  | <b>Pontine Tegmentum</b> | 44 | 38 | 2  | 19 | 21 | 21 | Cranial nerve nuclei 5-7; pontine reticular formation and raphe pontis; locus coeruleus; superior olivary complex; central grey of the pons                                                                                    | LMD   |
|                   |  | <b>Myelencephelon</b>    | 76 | 85 | 16 | 44 | 35 | 23 | Cranial nerve nuclei 8-12; spinal portion of the trigeminal nucleus; raphe nuclei and reticular formation of the medulla; arcuate nucleus; inferior olivary complex; cuneate nucleus; gracile nucleus; central glial substance | LMD   |
|                   |  | <b>White Matter</b>      | 4  | 1  | 7  | 2  | 2  | 4  | Corpus callosum and cingulum bundle                                                                                                                                                                                            | Macro |

| structure acronym (232) | subregion for analysis (132) | structure name                                 | structure id | parent structure id | hemisphere | color hex triplet | #              | #              | #              | #              | #              | #              |
|-------------------------|------------------------------|------------------------------------------------|--------------|---------------------|------------|-------------------|----------------|----------------|----------------|----------------|----------------|----------------|
|                         |                              |                                                |              |                     |            |                   | Samp. in brain |
|                         |                              |                                                |              |                     |            |                   | 1              | 2              | 3              | 4              | 5              | 6              |
| Br                      | N/A                          | brain                                          | 4005         | NA                  |            | A0A0A0            | 0              | 0              | 0              | 0              | 0              | 0              |
| GM                      | N/A                          | gray matter                                    | 4006         | 4005                |            | 787878            | 0              | 0              | 0              | 0              | 0              | 0              |
| Tel                     | N/A                          | telencephalon                                  | 4007         | 4006                |            | D988A3            | 0              | 0              | 0              | 0              | 0              | 0              |
| Cx                      | N/A                          | cerebral cortex                                | 4008         | 4007                |            | EDA65F            | 0              | 0              | 0              | 0              | 0              | 0              |
| FL                      | N/A                          | frontal lobe                                   | 4009         | 4008                |            | E8CD59            | 0              | 0              | 0              | 0              | 0              | 0              |
| AOrG                    | N/A                          | anterior orbital gyrus                         | 4053         | 4009                |            | E8BF59            | 0              | 0              | 0              | 0              | 0              | 0              |
| AOrG                    | *FL                          | anterior orbital gyrus, left                   | 4054         | 4053                | L          | E8BF59            | 0              | 0              | 0              | 2              | 2              | 1              |
| AOrG                    | *FL                          | anterior orbital gyrus, right                  | 4055         | 4053                | R          | E8BF59            | 1              | 0              | 0              | 0              | 0              | 0              |
| *fro                    | N/A                          | frontal operculum                              | 4078         | 4009                |            | E8C159            | 0              | 0              | 0              | 0              | 0              | 0              |
| *fro                    | *FL                          | frontal operculum, left                        | 4079         | 4078                | L          | E8C159            | 3              | 1              | 2              | 2              | 3              | 2              |
| *fro                    | *FL                          | frontal operculum, right                       | 4080         | 4078                | R          | E8C159            | 2              | 1              | 0              | 0              | 0              | 0              |
| FP                      | N/A                          | frontal pole                                   | 4888         | 4009                |            | E8C359            | 0              | 0              | 0              | 0              | 0              | 0              |
| FP                      | N/A                          | frontal pole, left                             | 4889         | 4888                | L          | E8C359            | 0              | 0              | 0              | 0              | 0              | 0              |
| FP-s                    | *FL                          | frontal pole, left, superior aspect            | 4890         | 4889                | L          | E8C359            | 2              | 1              | 0              | 0              | 0              | 0              |
| FPi                     | *FL                          | frontal pole, left, inferior aspect            | 4891         | 4889                | L          | E8C359            | 0              | 2              | 0              | 0              | 0              | 0              |
| FPm                     | *FL                          | frontal pole, left, medial aspect              | 4892         | 4889                | L          | E8C359            | 0              | 1              | 0              | 0              | 0              | 0              |
| FP                      | N/A                          | frontal pole, right                            | 4893         | 4888                | R          | E8C359            | 0              | 0              | 0              | 0              | 0              | 0              |
| FP-s                    | *FL                          | frontal pole, right, superior aspect           | 4894         | 4893                | R          | E8C359            | 0              | 2              | 0              | 0              | 0              | 0              |
| FPi                     | *FL                          | frontal pole, right, inferior aspect           | 4895         | 4893                | R          | E8C359            | 0              | 1              | 0              | 0              | 0              | 0              |
| FPm                     | *FL                          | frontal pole, right, medial aspect             | 4896         | 4893                | R          | E8C359            | 0              | 1              | 0              | 0              | 0              | 0              |
| GRe                     | N/A                          | gyrus rectus                                   | 4047         | 4009                |            | E8C459            | 0              | 0              | 0              | 0              | 0              | 0              |
| GRe                     | *FL                          | gyrus rectus, left                             | 4048         | 4047                | L          | E8C459            | 3              | 3              | 3              | 4              | 2              | 2              |
| GRe                     | *FL                          | gyrus rectus, right                            | 4049         | 4047                | R          | E8C459            | 5              | 4              | 0              | 0              | 0              | 0              |
| IFG                     | N/A                          | inferior frontal gyrus                         | 4035         | 4009                |            | E8C659            | 0              | 0              | 0              | 0              | 0              | 0              |
| IFG                     | N/A                          | inferior frontal gyrus, left                   | 4036         | 4035                | L          | E8C659            | 0              | 0              | 0              | 0              | 0              | 0              |
| IFG                     | N/A                          | inferior frontal gyrus, right                  | 4037         | 4035                | R          | E8C659            | 0              | 0              | 0              | 0              | 0              | 0              |
| opIFG                   | N/A                          | inferior frontal gyrus, opercular part         | 4041         | 4035                |            | E8C659            | 0              | 0              | 0              | 0              | 0              | 0              |
| opIFG                   | *FL                          | inferior frontal gyrus, opercular part, left   | 4042         | 4041                | L          | E8C659            | 1              | 1              | 0              | 3              | 0              | 2              |
| opIFG                   | *FL                          | inferior frontal gyrus, opercular part, right  | 4043         | 4041                | R          | E8C659            | 2              | 1              | 0              | 0              | 0              | 0              |
| *orIFG                  | N/A                          | inferior frontal gyrus, orbital part           | 4044         | 4035                |            | E8C659            | 0              | 0              | 0              | 0              | 0              | 0              |
| *orIFG                  | *FL                          | inferior frontal gyrus, orbital part, left     | 4045         | 4044                | L          | E8C659            | 2              | 2              | 2              | 3              | 3              | 3              |
| *orIFG                  | *FL                          | inferior frontal gyrus, orbital part, right    | 4046         | 4044                | R          | E8C659            | 3              | 2              | 0              | 0              | 0              | 0              |
| *trIFG                  | N/A                          | inferior frontal gyrus, triangular part        | 4038         | 4035                |            | E8C659            | 0              | 0              | 0              | 0              | 0              | 0              |
| *trIFG                  | *FL                          | inferior frontal gyrus, triangular part, left  | 4039         | 4038                | L          | E8C659            | 3              | 2              | 3              | 2              | 3              | 2              |
| *trIFG                  | *FL                          | inferior frontal gyrus, triangular part, right | 4040         | 4038                | R          | E8C659            | 1              | 2              | 0              | 0              | 0              | 0              |
| IRoG                    | N/A                          | inferior rostral gyrus                         | 4900         | 4009                |            | E8C859            | 0              | 0              | 0              | 0              | 0              | 0              |

|        |     |                                                                  |           |           |   |        |    |   |   |   |   |   |
|--------|-----|------------------------------------------------------------------|-----------|-----------|---|--------|----|---|---|---|---|---|
| IRoG   | *FL | inferior rostral gyrus, left                                     | 4901      | 4900      | L | E8C859 | 1  | 2 | 2 | 2 | 0 | 2 |
| IRoG   | *FL | inferior rostral gyrus, right                                    | 4902      | 4900      | R | E8C859 | 2  | 2 | 0 | 0 | 0 | 0 |
| LOrG   | N/A | lateral orbital gyrus                                            | 4059      | 4009      |   | E8CA59 | 0  | 0 | 0 | 0 | 0 | 0 |
| LOrG   | *FL | lateral orbital gyrus, left                                      | 4060      | 4059      | L | E8CA59 | 2  | 1 | 1 | 2 | 4 | 3 |
| LOrG   | *FL | lateral orbital gyrus, right                                     | 4061      | 4059      | R | E8CA59 | 1  | 3 | 0 | 0 | 0 | 0 |
| *MOrg  | N/A | medial orbital gyrus                                             | 4050      | 4009      |   | E8CB59 | 0  | 0 | 0 | 0 | 0 | 0 |
| *MOrg  | *FL | medial orbital gyrus, left                                       | 4051      | 4050      | L | E8CB59 | 1  | 3 | 4 | 4 | 4 | 3 |
| *MOrg  | *FL | medial orbital gyrus, right                                      | 4052      | 4050      | R | E8CB59 | 3  | 3 | 0 | 0 | 0 | 0 |
| MFG    | N/A | middle frontal gyrus                                             | 4028      | 4009      |   | E8CD59 | 0  | 0 | 0 | 0 | 0 | 0 |
| MFG    | N/A | middle frontal gyrus, left                                       | 4029      | 4028      | L | E8CD59 | 0  | 0 | 0 | 0 | 0 | 0 |
| *MFG-s | *FL | middle frontal gyrus, left, superior bank of gyrus               | 4030      | 4029      | L | E8CD59 | 5  | 6 | 4 | 4 | 6 | 5 |
| *MFG-i | *FL | middle frontal gyrus, left, inferior bank of gyrus               | 4031      | 4029      | L | E8CD59 | 7  | 5 | 3 | 4 | 5 | 5 |
| MFG    | N/A | middle frontal gyrus, right                                      | 4032      | 4028      | R | E8CD59 | 0  | 0 | 0 | 0 | 0 | 0 |
| *MFG-s | *FL | middle frontal gyrus, right, superior bank of gyrus              | 4033      | 4032      | R | E8CD59 | 10 | 6 | 0 | 0 | 0 | 0 |
| *MFG-i | *FL | middle frontal gyrus, right, inferior bank of gyrus              | 4034      | 4032      | R | E8CD59 | 7  | 6 | 0 | 0 | 0 | 0 |
| OlfA   | N/A | olfactory area                                                   | 265504406 | 4009      |   | E8CE59 | 0  | 0 | 0 | 0 | 0 | 0 |
| OlfA   | N/A | olfactory area, left                                             | 265504410 | 265504406 | L | E8CE59 | 0  | 0 | 0 | 0 | 0 | 0 |
| OlfA   | N/A | olfactory area, right                                            | 265504414 | 265504406 | R | E8CE59 | 0  | 0 | 0 | 0 | 0 | 0 |
| PCLa   | N/A | paracentral lobule, anterior part                                | 4071      | 4009      |   | E8CF59 | 0  | 0 | 0 | 0 | 0 | 0 |
| PCLa   | *FL | paracentral lobule, anterior part, left                          | 4072      | 4071      | L | E8CF59 | 0  | 0 | 1 | 0 | 1 | 0 |
| PCLa-s | *FL | paracentral lobule, anterior part, left, superior bank of gyrus  | 4073      | 4072      | L | E8CF59 | 4  | 3 | 0 | 2 | 2 | 2 |
| PCLa-i | *FL | paracentral lobule, anterior part, left, inferior bank of gyrus  | 4074      | 4072      | L | E8CF59 | 3  | 3 | 1 | 2 | 1 | 2 |
| PCLa   | N/A | paracentral lobule, anterior part, right                         | 4075      | 4071      | R | E8CF59 | 0  | 0 | 0 | 0 | 0 | 0 |
| PCLa-s | *FL | paracentral lobule, anterior part, right, superior bank of gyrus | 4076      | 4075      | R | E8CF59 | 3  | 2 | 0 | 0 | 0 | 0 |
| PCLa-i | *FL | paracentral lobule, anterior part, right, inferior bank of gyrus | 4077      | 4075      | R | E8CF59 | 3  | 2 | 0 | 0 | 0 | 0 |
| PTG    | N/A | paraterminal gyrus                                               | 4065      | 4009      |   | E8D059 | 0  | 0 | 0 | 0 | 0 | 0 |
| PTG    | N/A | paraterminal gyrus, left                                         | 4066      | 4065      | L | E8D059 | 0  | 0 | 0 | 0 | 0 | 0 |
| PTG    | *FL | paraterminal gyrus, right                                        | 4067      | 4065      | R | E8D059 | 0  | 1 | 0 | 0 | 0 | 0 |
| PaOG   | N/A | parolfactory gyri                                                | 4068      | 4009      |   | E8D259 | 0  | 0 | 0 | 0 | 0 | 0 |
| PaOG   | *FL | parolfactory gyri, left                                          | 4069      | 4068      | L | E8D259 | 1  | 2 | 0 | 2 | 1 | 1 |
| PaOG   | *FL | parolfactory gyri, right                                         | 4070      | 4068      | R | E8D259 | 1  | 0 | 0 | 0 | 0 | 0 |
| POrG   | N/A | posterior orbital gyrus                                          | 4056      | 4009      |   | E8D459 | 0  | 0 | 0 | 0 | 0 | 0 |

|         |      |                                                           |      |      |   |        |    |   |   |   |   |   |
|---------|------|-----------------------------------------------------------|------|------|---|--------|----|---|---|---|---|---|
| POrG    | *FL  | posterior orbital gyrus, left                             | 4057 | 4056 | L | E8D459 | 0  | 0 | 0 | 1 | 2 | 2 |
| POrG    | *FL  | posterior orbital gyrus, right                            | 4058 | 4056 | R | E8D459 | 1  | 2 | 0 | 0 | 0 | 0 |
| PrG     | N/A  | precentral gyrus                                          | 4010 | 4009 |   | E8D659 | 0  | 0 | 0 | 0 | 0 | 0 |
| PrG     | N/A  | precentral gyrus, left                                    | 4011 | 4010 | L | E8D659 | 0  | 0 | 0 | 0 | 0 | 0 |
| PrG-prc | *FL  | precentral gyrus, left, bank of the precentral sulcus     | 4012 | 4011 | L | E8D659 | 2  | 2 | 1 | 1 | 2 | 2 |
| *PrG-sl | *FL  | precentral gyrus, left, superior lateral aspect of gyrus  | 4013 | 4011 | L | E8D659 | 5  | 2 | 3 | 4 | 2 | 3 |
| PrG-il  | *FL  | precentral gyrus, left, inferior lateral aspect of gyrus  | 4014 | 4011 | L | E8D659 | 5  | 3 | 2 | 3 | 1 | 3 |
| PrG-cs  | *FL  | precentral gyrus, left, bank of the central sulcus        | 4015 | 4011 | L | E8D659 | 4  | 3 | 2 | 2 | 0 | 2 |
| PrG     | N/A  | precentral gyrus, right                                   | 4016 | 4010 | R | E8D659 | 0  | 0 | 0 | 0 | 0 | 0 |
| PrG-prc | *FL  | precentral gyrus, right, bank of the precentral sulcus    | 4017 | 4016 | R | E8D659 | 2  | 1 | 0 | 0 | 0 | 0 |
| *PrG-sl | *FL  | precentral gyrus, right, superior lateral aspect of gyrus | 4018 | 4016 | R | E8D659 | 4  | 1 | 0 | 0 | 0 | 0 |
| PrG-il  | *FL  | precentral gyrus, right, inferior lateral aspect of gyrus | 4019 | 4016 | R | E8D659 | 4  | 1 | 0 | 0 | 0 | 0 |
| PrG-cs  | *FL  | precentral gyrus, right, bank of the central sulcus       | 4020 | 4016 | R | E8D659 | 5  | 2 | 0 | 0 | 0 | 0 |
| SFG     | N/A  | superior frontal gyrus                                    | 4021 | 4009 |   | E8D959 | 0  | 0 | 0 | 0 | 0 | 0 |
| SFG     | *FL  | superior frontal gyrus, left                              | 4022 | 4021 | L | E8D959 | 0  | 0 | 0 | 0 | 1 | 0 |
| *SFG-m  | *FL  | superior frontal gyrus, left, medial bank of gyrus        | 4023 | 4022 | L | E8D959 | 10 | 6 | 4 | 6 | 6 | 6 |
| *SFG-l  | *FL  | superior frontal gyrus, left, lateral bank of gyrus       | 4024 | 4022 | L | E8D959 | 8  | 7 | 3 | 6 | 5 | 5 |
| SFG     | N/A  | superior frontal gyrus, right                             | 4025 | 4021 | R | E8D959 | 0  | 0 | 0 | 0 | 0 | 0 |
| *SFG-m  | *FL  | superior frontal gyrus, right, medial bank of gyrus       | 4026 | 4025 | R | E8D959 | 9  | 6 | 0 | 0 | 0 | 0 |
| *SFG-l  | *FL  | superior frontal gyrus, right, lateral bank of gyrus      | 4027 | 4025 | R | E8D959 | 6  | 7 | 0 | 0 | 0 | 0 |
| SRoG    | N/A  | superior rostral gyrus                                    | 4897 | 4009 |   | E8DB59 | 0  | 0 | 0 | 0 | 0 | 0 |
| SRoG    | *FL  | superior rostral gyrus, left                              | 4898 | 4897 | L | E8DB59 | 0  | 2 | 0 | 1 | 2 | 1 |
| SRoG    | *FL  | superior rostral gyrus, right                             | 4899 | 4897 | R | E8DB59 | 1  | 1 | 0 | 0 | 0 | 0 |
| Ins     | N/A  | insula                                                    | 4268 | 4008 |   | FEFF61 | 0  | 0 | 0 | 0 | 0 | 0 |
| *LIG    | N/A  | long insular gyri                                         | 4269 | 4268 |   | FFF161 | 0  | 0 | 0 | 0 | 0 | 0 |
| *LIG    | *LIG | long insular gyri, left                                   | 4270 | 4269 | L | FFF161 | 2  | 2 | 2 | 4 | 4 | 3 |
| *LIG    | *LIG | long insular gyri, right                                  | 4271 | 4269 | R | FFF161 | 3  | 2 | 0 | 0 | 0 | 0 |
| *SIG    | N/A  | short insular gyri                                        | 4272 | 4268 |   | EFF61  | 0  | 0 | 0 | 0 | 0 | 0 |

|         |         |                                                                    |      |      |   |        |   |   |   |   |   |   |
|---------|---------|--------------------------------------------------------------------|------|------|---|--------|---|---|---|---|---|---|
| *SIG    | *SIG    | short insular gyri, left                                           | 4273 | 4272 | L | FFFF61 | 2 | 1 | 2 | 4 | 3 | 3 |
| *SIG    | *SIG    | short insular gyri, right                                          | 4274 | 4272 | R | FFFF61 | 4 | 2 | 0 | 0 | 0 | 0 |
| LL      | N/A     | limbic lobe                                                        | 4219 | 4008 |   | BF934C | 0 | 0 | 0 | 0 | 0 | 0 |
| CgG     | N/A     | cingulate gyrus                                                    | 4220 | 4219 |   | 7F6233 | 0 | 0 | 0 | 0 | 0 | 0 |
| CgGf    | N/A     | cingulate gyrus, frontal part                                      | 4221 | 4220 |   | 7F5B33 | 0 | 0 | 0 | 0 | 0 | 0 |
| CgGf    | CgGf    | cingulate gyrus, frontal part, left                                | 4222 | 4221 | L | 7F5B33 | 0 | 0 | 1 | 0 | 0 | 0 |
| *CgGf-s | *CgGf-s | cingulate gyrus, frontal part, left, superior bank of gyrus        | 4223 | 4222 | L | 7F5B33 | 2 | 5 | 4 | 5 | 6 | 6 |
| *CgGf-i | *CgGf-i | cingulate gyrus, frontal part, left, inferior bank of gyrus        | 4224 | 4222 | L | 7F5B33 | 3 | 3 | 6 | 5 | 6 | 6 |
| CgGf    | N/A     | cingulate gyrus, frontal part, right                               | 4225 | 4221 | R | 7F5B33 | 0 | 0 | 0 | 0 | 0 | 0 |
| *CgGf-s | *CgGf-s | cingulate gyrus, frontal part, right, superior bank of gyrus       | 4226 | 4225 | R | 7F5B33 | 4 | 6 | 0 | 0 | 0 | 0 |
| *CgGf-i | *CgGf-i | cingulate gyrus, frontal part, right, inferior bank of gyrus       | 4227 | 4225 | R | 7F5B33 | 2 | 4 | 0 | 0 | 0 | 0 |
| CgGp    | N/A     | cingulate gyrus, parietal part                                     | 4228 | 4220 |   | 7F6233 | 0 | 0 | 0 | 0 | 0 | 0 |
| CgGp    | N/A     | cingulate gyrus, parietal part, left                               | 4229 | 4228 | L | 7F6233 | 0 | 0 | 0 | 0 | 0 | 0 |
| *CgGp-s | *CgGp-s | cingulate gyrus, parietal part, left, superior bank of gyrus       | 4230 | 4229 | L | 7F6233 | 2 | 1 | 3 | 4 | 4 | 3 |
| CgGp-i  | *CgGp-i | cingulate gyrus, parietal part, left, inferior bank of gyrus       | 4231 | 4229 | L | 7F6233 | 2 | 0 | 3 | 5 | 4 | 3 |
| CgGp    | N/A     | cingulate gyrus, parietal part, right                              | 4232 | 4228 | R | 7F6233 | 0 | 0 | 0 | 0 | 0 | 0 |
| *CgGp-s | *CgGp-s | cingulate gyrus, parietal part, right, superior bank of gyrus      | 4233 | 4232 | R | 7F6233 | 2 | 1 | 0 | 0 | 0 | 0 |
| CgGp-i  | *CgGp-i | cingulate gyrus, parietal part, right, inferior bank of gyrus      | 4234 | 4232 | R | 7F6233 | 2 | 1 | 0 | 0 | 0 | 0 |
| CgGr    | N/A     | cingulate gyrus, retrosplenial part                                | 4235 | 4220 |   | 7F6933 | 0 | 0 | 0 | 0 | 0 | 0 |
| CgGr    | CgGr    | cingulate gyrus, retrosplenial part, left                          | 4236 | 4235 | L | 7F6933 | 0 | 0 | 0 | 1 | 0 | 0 |
| CgGr-s  | CgGr-s  | cingulate gyrus, retrosplenial part, left, superior bank of gyrus  | 4237 | 4236 | L | 7F6933 | 0 | 0 | 0 | 1 | 2 | 2 |
| CgGr-i  | CgGr-i  | cingulate gyrus, retrosplenial part, left, inferior bank of gyrus  | 4238 | 4236 | L | 7F6933 | 0 | 2 | 0 | 1 | 1 | 0 |
| CgGr    | N/A     | cingulate gyrus, retrosplenial part, right                         | 4239 | 4235 | R | 7F6933 | 0 | 0 | 0 | 0 | 0 | 0 |
| CgGr-s  | CgGr-s  | cingulate gyrus, retrosplenial part, right, superior bank of gyrus | 4240 | 4239 | R | 7F6933 | 0 | 1 | 0 | 0 | 0 | 0 |
| CgGr-i  | CgGr-i  | cingulate gyrus, retrosplenial part, right, inferior bank of gyrus | 4241 | 4239 | R | 7F6933 | 0 | 3 | 0 | 0 | 0 | 0 |
| SCG     | N/A     | subcallosal cingulate gyrus                                        | 4062 | 4220 |   | 7F5F33 | 0 | 0 | 0 | 0 | 0 | 0 |
| SCG     | *FL     | subcallosal cingulate gyrus, left                                  | 4063 | 4062 | L | 7F5F33 | 0 | 1 | 2 | 1 | 0 | 1 |
| SCG     | *FL     | subcallosal cingulate gyrus, right                                 | 4064 | 4062 | R | 7F5F33 | 1 | 1 | 0 | 0 | 0 | 0 |

|          |          |                                                     |           |           |   |        |   |   |   |   |   |   |
|----------|----------|-----------------------------------------------------|-----------|-----------|---|--------|---|---|---|---|---|---|
| HiF      | N/A      | hippocampal formation                               | 4249      | 4219      |   | FFC466 | 0 | 0 | 0 | 0 | 0 | 0 |
| *DG      | N/A      | dentate gyrus                                       | 12891     | 4249      |   | FFB566 | 0 | 0 | 0 | 0 | 0 | 0 |
| *DG      | *DG      | dentate gyrus, left                                 | 4258      | 12891     | L | FFB566 | 5 | 5 | 2 | 3 | 3 | 3 |
| *DG      | *DG      | dentate gyrus, right                                | 4267      | 12891     | R | FFB566 | 5 | 4 | 0 | 0 | 0 | 0 |
| *CA1     | N/A      | CA1 field                                           | 12892     | 4249      |   | FFBA66 | 0 | 0 | 0 | 0 | 0 | 0 |
| *CA1     | *CA1     | CA1 field, left                                     | 4254      | 12892     | L | FFBA66 | 5 | 5 | 4 | 4 | 2 | 4 |
| *CA1     | *CA1     | CA1 field, right                                    | 4263      | 12892     | R | FFBA66 | 6 | 6 | 0 | 0 | 0 | 0 |
| *CA2     | N/A      | CA2 field                                           | 12893     | 4249      |   | FFBF66 | 0 | 0 | 0 | 0 | 0 | 0 |
| *CA2     | *CA2     | CA2 field, left                                     | 4255      | 12893     | L | FFBF66 | 5 | 3 | 2 | 3 | 3 | 3 |
| *CA2     | *CA2     | CA2 field, right                                    | 4264      | 12893     | R | FFBF66 | 4 | 5 | 0 | 0 | 0 | 0 |
| *CA3     | N/A      | CA3 field                                           | 12894     | 4249      |   | FFC466 | 0 | 0 | 0 | 0 | 0 | 0 |
| *CA3     | *CA3     | CA3 field, left                                     | 4256      | 12894     | L | FFC466 | 5 | 4 | 2 | 4 | 3 | 3 |
| *CA3     | *CA3     | CA3 field, right                                    | 4265      | 12894     | R | FFC466 | 5 | 4 | 0 | 0 | 0 | 0 |
| *CA4     | N/A      | CA4 field                                           | 12895     | 4249      |   | FFC966 | 0 | 0 | 0 | 0 | 0 | 0 |
| *CA4     | *CA4     | CA4 field, left                                     | 4257      | 12895     | L | FFC966 | 5 | 4 | 1 | 4 | 3 | 3 |
| *CA4     | *CA4     | CA4 field, right                                    | 4266      | 12895     | R | FFC966 | 5 | 5 | 0 | 0 | 0 | 0 |
| IG       | N/A      | indusium griseum                                    | 265504424 | 4249      |   | FFCE66 | 0 | 0 | 0 | 0 | 0 | 0 |
| IG       | N/A      | indusium griseum, left                              | 265504428 | 265504424 | L | FFCE66 | 0 | 0 | 0 | 0 | 0 | 0 |
| IG       | N/A      | indusium griseum, right                             | 265504432 | 265504424 | R | FFCE66 | 0 | 0 | 0 | 0 | 0 | 0 |
| *S       | N/A      | subiculum                                           | 12896     | 4249      |   | FFD366 | 0 | 0 | 0 | 0 | 0 | 0 |
| *S       | *S       | subiculum, left                                     | 4251      | 12896     | L | FFD366 | 6 | 5 | 3 | 4 | 3 | 4 |
| PrS      | N/A      | presubiculum, left                                  | 4252      | 4251      | L | FFD366 | 0 | 0 | 0 | 0 | 0 | 0 |
| PaS      | N/A      | parasubiculum, left                                 | 4253      | 4251      | L | FFD366 | 0 | 0 | 0 | 0 | 0 | 0 |
| ProS     | N/A      | prosubiculum, left                                  | 265504436 | 4251      | L | FFD366 | 0 | 0 | 0 | 0 | 0 | 0 |
| Sub      | N/A      | subiculum proper, left                              | 265504440 | 4251      | L | FFD366 | 0 | 0 | 0 | 0 | 0 | 0 |
| *S       | *S       | subiculum, right                                    | 4260      | 12896     | R | FFD366 | 5 | 4 | 0 | 0 | 0 | 0 |
| PrS      | N/A      | presubiculum, right                                 | 4261      | 4260      | R | FFD366 | 0 | 0 | 0 | 0 | 0 | 0 |
| PaS      | N/A      | parasubiculum, right                                | 4262      | 4260      | R | FFD366 | 0 | 0 | 0 | 0 | 0 | 0 |
| ProS     | N/A      | prosubiculum, right                                 | 265504444 | 4260      | R | FFD366 | 0 | 0 | 0 | 0 | 0 | 0 |
| Sub      | N/A      | subiculum proper, right                             | 265504448 | 4260      | R | FFD366 | 0 | 0 | 0 | 0 | 0 | 0 |
| PHG      | N/A      | parahippocampal gyrus                               | 4242      | 4219      |   | BF934C | 0 | 0 | 0 | 0 | 0 | 0 |
| PHG      | N/A      | parahippocampal gyrus, left                         | 4243      | 4242      | L | BF934C | 0 | 0 | 0 | 0 | 0 | 0 |
| *PHG-l   | *PHG-l   | parahippocampal gyrus, left, lateral bank of gyrus  | 4244      | 4243      | L | BF934C | 3 | 2 | 5 | 7 | 4 | 5 |
| *PHG-cos | *PHG-cos | parahippocampal gyrus, left, bank of the cos        | 4245      | 4243      | L | BF934C | 4 | 2 | 2 | 2 | 5 | 4 |
| PHG      | N/A      | parahippocampal gyrus, right                        | 4246      | 4242      | R | BF934C | 0 | 0 | 0 | 0 | 0 | 0 |
| *PHG-l   | *PHG-l   | parahippocampal gyrus, right, lateral bank of gyrus | 4247      | 4246      | R | BF934C | 3 | 2 | 0 | 0 | 0 | 0 |

|           |          |                                                         |       |       |   |        |   |   |   |   |   |   |
|-----------|----------|---------------------------------------------------------|-------|-------|---|--------|---|---|---|---|---|---|
| *PHG-cos  | *PHG-cos | parahippocampal gyrus, right, bank of the cos           | 4248  | 4246  | R | BF934C | 4 | 3 | 0 | 0 | 0 | 0 |
| Pir       | N/A      | piriform cortex                                         | 10142 | 4219  |   | BF9E4C | 0 | 0 | 0 | 0 | 0 | 0 |
| Pir       | Pir      | piriform cortex, left                                   | 10143 | 10142 | L | BF9E4C | 0 | 0 | 0 | 1 | 1 | 1 |
| Pir       | N/A      | piriform cortex, right                                  | 10144 | 10142 | R | BF9E4C | 0 | 0 | 0 | 0 | 0 | 0 |
| OL        | N/A      | occipital lobe                                          | 4180  | 4008  |   | E88551 | 0 | 0 | 0 | 0 | 0 | 0 |
| Cun       | N/A      | cuneus                                                  | 4184  | 4180  |   | E87751 | 0 | 0 | 0 | 0 | 0 | 0 |
| Cun       | N/A      | cuneus, left                                            | 4185  | 4184  | L | E87751 | 0 | 0 | 0 | 0 | 0 | 0 |
| *Cun-pest | *OL      | cuneus, left, peristriate                               | 4186  | 4185  | L | E87751 | 1 | 3 | 3 | 3 | 4 | 2 |
| Cun-str   | *OL      | cuneus, left, striate                                   | 4187  | 4185  | L | E87751 | 1 | 2 | 1 | 3 | 4 | 5 |
| Cun       | N/A      | cuneus, right                                           | 4188  | 4184  | R | E87751 | 0 | 0 | 0 | 0 | 0 | 0 |
| *Cun-pest | *OL      | cuneus, right, peristriate                              | 4189  | 4188  | R | E87751 | 1 | 1 | 0 | 0 | 0 | 0 |
| Cun-str   | *OL      | cuneus, right, striate                                  | 4190  | 4188  | R | E87751 | 1 | 2 | 0 | 0 | 0 | 0 |
| IOG       | N/A      | inferior occipital gyrus                                | 4205  | 4180  |   | E87B51 | 0 | 0 | 0 | 0 | 0 | 0 |
| IOG       | N/A      | inferior occipital gyrus, left                          | 4206  | 4205  | L | E87B51 | 0 | 0 | 0 | 0 | 0 | 0 |
| IOG-s     | *OL      | inferior occipital gyrus, left, superior bank of gyrus  | 4207  | 4206  | L | E87B51 | 0 | 2 | 2 | 4 | 1 | 4 |
| IOG-i     | *OL      | inferior occipital gyrus, left, inferior bank of gyrus  | 4208  | 4206  | L | E87B51 | 0 | 3 | 1 | 6 | 1 | 4 |
| IOG       | N/A      | inferior occipital gyrus, right                         | 4209  | 4205  | R | E87B51 | 0 | 0 | 0 | 0 | 0 | 0 |
| IOG-s     | *OL      | inferior occipital gyrus, right, superior bank of gyrus | 4210  | 4209  | R | E87B51 | 0 | 1 | 0 | 0 | 0 | 0 |
| IOG-i     | *OL      | inferior occipital gyrus, right, inferior bank of gyrus | 4211  | 4209  | R | E87B51 | 0 | 3 | 0 | 0 | 0 | 0 |
| LiG       | N/A      | lingual gyrus                                           | 4191  | 4180  |   | E88051 | 0 | 0 | 0 | 0 | 0 | 0 |
| LiG       | N/A      | lingual gyrus, left                                     | 4192  | 4191  | L | E88051 | 0 | 0 | 0 | 0 | 0 | 0 |
| *LiG-pest | *OL      | lingual gyrus, left, peristriate                        | 4193  | 4192  | L | E88051 | 5 | 3 | 4 | 5 | 5 | 6 |
| *LiG-str  | *OL      | lingual gyrus, left, striate                            | 4194  | 4192  | L | E88051 | 2 | 4 | 3 | 7 | 4 | 4 |
| LiG       | N/A      | lingual gyrus, right                                    | 4195  | 4191  | R | E88051 | 0 | 0 | 0 | 0 | 0 | 0 |
| *LiG-pest | *OL      | lingual gyrus, right, peristriate                       | 4196  | 4195  | R | E88051 | 3 | 4 | 0 | 0 | 0 | 0 |
| *LiG-str  | *OL      | lingual gyrus, right, striate                           | 4197  | 4195  | R | E88051 | 4 | 3 | 0 | 0 | 0 | 0 |
| OP        | N/A      | occipital pole                                          | 4181  | 4180  |   | E88551 | 0 | 0 | 0 | 0 | 0 | 0 |
| OP        | N/A      | occipital pole, left                                    | 4182  | 4181  | L | E88551 | 0 | 0 | 0 | 0 | 0 | 0 |
| OPs       | *OL      | occipital pole, left, superior aspect                   | 4909  | 4182  | L | E88551 | 0 | 0 | 0 | 0 | 1 | 0 |
| OPi       | *OL      | occipital pole, left, inferior aspect                   | 4910  | 4182  | L | E88551 | 0 | 0 | 0 | 0 | 1 | 0 |
| OPI       | *OL      | occipital pole, left, lateral aspect                    | 4911  | 4182  | L | E88551 | 0 | 0 | 0 | 0 | 1 | 0 |
| OP        | N/A      | occipital pole, right                                   | 4183  | 4181  | R | E88551 | 0 | 0 | 0 | 0 | 0 | 0 |
| OPs       | N/A      | occipital pole, right, superior aspect                  | 4912  | 4183  | R | E88551 | 0 | 0 | 0 | 0 | 0 | 0 |
| OPi       | N/A      | occipital pole, right, inferior aspect                  | 4913  | 4183  | R | E88551 | 0 | 0 | 0 | 0 | 0 | 0 |
| OPI       | N/A      | occipital pole, right, lateral aspect                   | 4914  | 4183  | R | E88551 | 0 | 0 | 0 | 0 | 0 | 0 |



|        |     |                                                         |      |      |   |        |   |   |   |   |   |   |
|--------|-----|---------------------------------------------------------|------|------|---|--------|---|---|---|---|---|---|
| OTG    | N/A | occipito-temporal gyrus                                 | 4198 | 4180 |   | E88A51 | 0 | 0 | 0 | 0 | 0 | 0 |
| OTG    | N/A | occipito-temporal gyrus, left                           | 4199 | 4198 | L | E88A51 | 0 | 0 | 0 | 0 | 0 | 0 |
| *OTG-s | *OL | occipito-temporal gyrus, left, superior bank of gyrus   | 4200 | 4199 | L | E88A51 | 3 | 1 | 4 | 4 | 3 | 2 |
| OTG-i  | *OL | occipito-temporal gyrus, left, inferior bank of gyrus   | 4201 | 4199 | L | E88A51 | 3 | 1 | 1 | 3 | 3 | 2 |
| OTG    | N/A | occipito-temporal gyrus, right                          | 4202 | 4198 | R | E88A51 | 0 | 0 | 0 | 0 | 0 | 0 |
| *OTG-s | *OL | occipito-temporal gyrus, right, superior bank of gyrus  | 4203 | 4202 | R | E88A51 | 2 | 2 | 0 | 0 | 0 | 0 |
| OTG-i  | *OL | occipito-temporal gyrus, right, inferior bank of gyrus  | 4204 | 4202 | R | E88A51 | 2 | 3 | 0 | 0 | 0 | 0 |
| SOG    | N/A | superior occipital gyrus                                | 4212 | 4180 |   | E88F51 | 0 | 0 | 0 | 0 | 0 | 0 |
| SOG    | N/A | superior occipital gyrus, left                          | 4213 | 4212 | L | E88F51 | 0 | 0 | 0 | 0 | 0 | 0 |
| SOG-s  | *OL | superior occipital gyrus, left, superior bank of gyrus  | 4214 | 4213 | L | E88F51 | 1 | 2 | 2 | 2 | 3 | 3 |
| SOG-i  | *OL | superior occipital gyrus, left, inferior bank of gyrus  | 4215 | 4213 | L | E88F51 | 0 | 2 | 2 | 1 | 3 | 3 |
| SOG    | N/A | superior occipital gyrus, right                         | 4216 | 4212 | R | E88F51 | 0 | 0 | 0 | 0 | 0 | 0 |
| SOG-s  | *OL | superior occipital gyrus, right, superior bank of gyrus | 4217 | 4216 | R | E88F51 | 1 | 2 | 0 | 0 | 0 | 0 |
| SOG-i  | *OL | superior occipital gyrus, right, inferior bank of gyrus | 4218 | 4216 | R | E88F51 | 0 | 1 | 0 | 0 | 0 | 0 |
| PL     | N/A | parietal lobe                                           | 4084 | 4008 |   | FF6C62 | 0 | 0 | 0 | 0 | 0 | 0 |
| IPL    | N/A | inferior parietal lobule                                | 4103 | 4084 |   | FF5D62 | 0 | 0 | 0 | 0 | 0 | 0 |
| AnG    | N/A | angular gyrus                                           | 4111 | 4103 |   | FF5D62 | 0 | 0 | 0 | 0 | 0 | 0 |
| AnG    | N/A | angular gyrus, left                                     | 4112 | 4111 | L | FF5D62 | 0 | 0 | 0 | 0 | 0 | 0 |
| *AnG-s | *PL | angular gyrus, left, superior bank of gyrus             | 4113 | 4112 | L | FF5D62 | 3 | 2 | 3 | 2 | 3 | 4 |
| *AnG-i | *PL | angular gyrus, left, inferior bank of gyrus             | 4114 | 4112 | L | FF5D62 | 2 | 2 | 4 | 2 | 2 | 4 |
| AnG    | N/A | angular gyrus, right                                    | 4115 | 4111 | R | FF5D62 | 0 | 0 | 0 | 0 | 0 | 0 |
| *AnG-s | *PL | angular gyrus, right, superior bank of gyrus            | 4116 | 4115 | R | FF5D62 | 2 | 2 | 0 | 0 | 0 | 0 |
| *AnG-i | *PL | angular gyrus, right, inferior bank of gyrus            | 4117 | 4115 | R | FF5D62 | 2 | 3 | 0 | 0 | 0 | 0 |
| SMG    | N/A | supramarginal gyrus                                     | 4104 | 4103 |   | FF5D62 | 0 | 0 | 0 | 0 | 0 | 0 |
| SMG    | N/A | supramarginal gyrus, left                               | 4105 | 4104 | L | FF5D62 | 0 | 0 | 0 | 0 | 0 | 0 |
| SMG-s  | *PL | supramarginal gyrus, left, superior bank of gyrus       | 4106 | 4105 | L | FF5D62 | 3 | 1 | 1 | 4 | 4 | 2 |
| SMG-i  | *PL | supramarginal gyrus, left, inferior bank of gyrus       | 4107 | 4105 | L | FF5D62 | 5 | 2 | 1 | 4 | 3 | 1 |
| SMG    | N/A | supramarginal gyrus, right                              | 4108 | 4104 | R | FF5D62 | 0 | 0 | 0 | 0 | 0 | 0 |
| SMG-s  | *PL | supramarginal gyrus, right, superior bank of gyrus      | 4109 | 4108 | R | FF5D62 | 3 | 2 | 0 | 0 | 0 | 0 |

|         |     |                                                                     |      |      |   |        |   |   |   |   |   |   |
|---------|-----|---------------------------------------------------------------------|------|------|---|--------|---|---|---|---|---|---|
| SMG-i   | *PL | supramarginal gyrus, right, inferior bank of gyrus                  | 4110 | 4108 | R | FF5D62 | 4 | 2 | 0 | 0 | 0 | 0 |
| PCLp    | N/A | paracentral lobule, posterior part                                  | 4125 | 4084 |   | FF6462 | 0 | 0 | 0 | 0 | 0 | 0 |
| PCLp    | N/A | paracentral lobule, posterior part, left                            | 4126 | 4125 | L | FF6462 | 0 | 0 | 0 | 0 | 0 | 0 |
| PCLp-l  | *PL | paracentral lobule, posterior part, left, lateral bank of gyrus     | 4127 | 4126 | L | FF6462 | 0 | 0 | 0 | 0 | 0 | 1 |
| PCLp-cs | *PL | paracentral lobule, posterior part, left, bank of cingulate sulcus  | 4128 | 4126 | L | FF6462 | 0 | 0 | 0 | 0 | 0 | 1 |
| PCLp    | N/A | paracentral lobule, posterior part, right                           | 4129 | 4125 | R | FF6462 | 0 | 0 | 0 | 0 | 0 | 0 |
| PCLp-l  | *PL | paracentral lobule, posterior part, right, lateral bank of gyrus    | 4130 | 4129 | R | FF6462 | 2 | 0 | 0 | 0 | 0 | 0 |
| PCLp-cs | *PL | paracentral lobule, posterior part, right, bank of cingulate sulcus | 4131 | 4129 | R | FF6462 | 1 | 0 | 0 | 0 | 0 | 0 |
| PoG     | N/A | postcentral gyrus                                                   | 4085 | 4084 |   | FF6C62 | 0 | 0 | 0 | 0 | 0 | 0 |
| PoG     | N/A | postcentral gyrus, left                                             | 4086 | 4085 | L | FF6C62 | 0 | 0 | 0 | 0 | 0 | 0 |
| *PoG-cs | *PL | postcentral gyrus, left, bank of the central sulcus                 | 4087 | 4086 | L | FF6C62 | 4 | 3 | 3 | 2 | 2 | 3 |
| *PoG-sl | *PL | postcentral gyrus, left, superior lateral aspect of gyrus           | 4088 | 4086 | L | FF6C62 | 2 | 4 | 3 | 4 | 2 | 3 |
| PoG-il  | *PL | postcentral gyrus, left, inferior lateral aspect of gyrus           | 4089 | 4086 | L | FF6C62 | 2 | 3 | 3 | 2 | 0 | 3 |
| PoG-pcs | *PL | postcentral gyrus, left, bank of the posterior central sulcus       | 4090 | 4086 | L | FF6C62 | 3 | 2 | 3 | 1 | 1 | 0 |
| PoG     | N/A | postcentral gyrus, right                                            | 4091 | 4085 | R | FF6C62 | 0 | 0 | 0 | 0 | 0 | 0 |
| *PoG-cs | *PL | postcentral gyrus, right, bank of the central sulcus                | 4092 | 4091 | R | FF6C62 | 4 | 3 | 0 | 0 | 0 | 0 |
| *PoG-sl | *PL | postcentral gyrus, right, superior lateral aspect of gyrus          | 4093 | 4091 | R | FF6C62 | 4 | 4 | 0 | 0 | 0 | 0 |
| PoG-il  | *PL | postcentral gyrus, right, inferior lateral aspect of gyrus          | 4094 | 4091 | R | FF6C62 | 5 | 2 | 0 | 0 | 0 | 0 |
| PoG-pcs | *PL | postcentral gyrus, right, bank of the posterior central sulcus      | 4095 | 4091 | R | FF6C62 | 2 | 1 | 0 | 0 | 0 | 0 |
| PCu     | N/A | precuneus                                                           | 4118 | 4084 |   | FF7462 | 0 | 0 | 0 | 0 | 0 | 0 |
| PCu     | N/A | precuneus, left                                                     | 4119 | 4118 | L | FF7462 | 0 | 0 | 0 | 0 | 0 | 0 |
| *Pcu-s  | *PL | precuneus, left, superior lateral bank of gyrus                     | 4120 | 4119 | L | FF7462 | 2 | 1 | 3 | 5 | 4 | 4 |
| *Pcu-i  | *PL | precuneus, left, inferior lateral bank of gyrus                     | 4121 | 4119 | L | FF7462 | 3 | 2 | 4 | 4 | 4 | 4 |
| PCu     | N/A | precuneus, right                                                    | 4122 | 4118 | R | FF7462 | 0 | 0 | 0 | 0 | 0 | 0 |

|          |     |                                                         |      |      |   |        |   |   |   |   |   |   |
|----------|-----|---------------------------------------------------------|------|------|---|--------|---|---|---|---|---|---|
| *Pcu-s   | *PL | precuneus, right, superior lateral bank of gyrus        | 4123 | 4122 | R | FF7462 | 3 | 2 | 0 | 0 | 0 | 0 |
| *Pcu-i   | *PL | precuneus, right, inferior lateral bank of gyrus        | 4124 | 4122 | R | FF7462 | 3 | 2 | 0 | 0 | 0 | 0 |
| SPL      | N/A | superior parietal lobule                                | 4096 | 4084 |   | FF7B62 | 0 | 0 | 0 | 0 | 0 | 0 |
| SPL      | N/A | superior parietal lobule, left                          | 4097 | 4096 | L | FF7B62 | 0 | 0 | 0 | 0 | 0 | 0 |
| *SPL-s   | *PL | superior parietal lobule, left, superior bank of gyrus  | 4098 | 4097 | L | FF7B62 | 2 | 2 | 3 | 4 | 3 | 5 |
| *SPL-i   | *PL | superior parietal lobule, left, inferior bank of gyrus  | 4099 | 4097 | L | FF7B62 | 2 | 2 | 4 | 5 | 4 | 4 |
| SPL      | N/A | superior parietal lobule, right                         | 4100 | 4096 | R | FF7B62 | 0 | 0 | 0 | 0 | 0 | 0 |
| *SPL-s   | *PL | superior parietal lobule, right, superior bank of gyrus | 4101 | 4100 | R | FF7B62 | 3 | 3 | 0 | 0 | 0 | 0 |
| *SPL-i   | *PL | superior parietal lobule, right, inferior bank of gyrus | 4102 | 4100 | R | FF7B62 | 1 | 3 | 0 | 0 | 0 | 0 |
| TL       | N/A | temporal lobe                                           | 4132 | 4008 |   | FF937F | 0 | 0 | 0 | 0 | 0 | 0 |
| FuG      | N/A | fusiform gyrus                                          | 4156 | 4132 |   | FF877F | 0 | 0 | 0 | 0 | 0 | 0 |
| FuG      | N/A | fusiform gyrus, left                                    | 4157 | 4156 | L | FF877F | 0 | 0 | 0 | 0 | 0 | 0 |
| *FuG-its | *TL | fusiform gyrus, left, bank of the its                   | 4158 | 4157 | L | FF877F | 3 | 3 | 2 | 5 | 3 | 4 |
| FuG-l    | *TL | fusiform gyrus, left, lateral bank of gyrus             | 4159 | 4157 | L | FF877F | 4 | 2 | 0 | 4 | 3 | 5 |
| *FuG-cos | *TL | fusiform gyrus, left, bank of cos                       | 4160 | 4157 | L | FF877F | 4 | 1 | 2 | 5 | 3 | 3 |
| FuG      | N/A | fusiform gyrus, right                                   | 4161 | 4156 | R | FF877F | 0 | 0 | 0 | 0 | 0 | 0 |
| *FuG-its | *TL | fusiform gyrus, right, bank of the its                  | 4162 | 4161 | R | FF877F | 5 | 3 | 0 | 0 | 0 | 0 |
| FuG-l    | *TL | fusiform gyrus, right, lateral bank of gyrus            | 4163 | 4161 | R | FF877F | 4 | 1 | 0 | 0 | 0 | 0 |
| *FuG-cos | *TL | fusiform gyrus, right, bank of cos                      | 4164 | 4161 | R | FF877F | 4 | 2 | 0 | 0 | 0 | 0 |
| HG       | N/A | Heschl's gyrus                                          | 4165 | 4132 |   | FF8A7F | 0 | 0 | 0 | 0 | 0 | 0 |
| HG       | *TL | Heschl's gyrus, left                                    | 4166 | 4165 | L | FF8A7F | 3 | 2 | 1 | 1 | 1 | 3 |
| HG       | *TL | Heschl's gyrus, right                                   | 4167 | 4165 | R | FF8A7F | 4 | 1 | 0 | 0 | 0 | 0 |
| ITG      | N/A | inferior temporal gyrus                                 | 4147 | 4132 |   | FF8D7F | 0 | 0 | 0 | 0 | 0 | 0 |
| ITG      | N/A | inferior temporal gyrus, left                           | 4148 | 4147 | L | FF8D7F | 0 | 0 | 0 | 0 | 0 | 0 |
| *ITG-its | *TL | inferior temporal gyrus, left, bank of the its          | 4149 | 4148 | L | FF8D7F | 6 | 4 | 4 | 6 | 5 | 7 |
| ITG-l    | *TL | inferior temporal gyrus, left, lateral bank of gyrus    | 4150 | 4148 | L | FF8D7F | 5 | 2 | 1 | 8 | 4 | 4 |
| *ITG-mts | *TL | inferior temporal gyrus, left, bank of mts              | 4151 | 4148 | L | FF8D7F | 9 | 3 | 3 | 7 | 3 | 5 |
| ITG      | N/A | inferior temporal gyrus, right                          | 4152 | 4147 | R | FF8D7F | 0 | 0 | 0 | 0 | 0 | 0 |
| *ITG-its | *TL | inferior temporal gyrus, right, bank of the its         | 4153 | 4152 | R | FF8D7F | 8 | 5 | 0 | 0 | 0 | 0 |
| ITG-l    | *TL | inferior temporal gyrus, right, lateral bank of gyrus   | 4154 | 4152 | R | FF8D7F | 6 | 2 | 0 | 0 | 0 | 0 |
| *ITG-mts | *TL | inferior temporal gyrus, right, bank of mts             | 4155 | 4152 | R | FF8D7F | 8 | 4 | 0 | 0 | 0 | 0 |

|        |     |                                                        |      |      |   |        |    |   |   |   |   |   |
|--------|-----|--------------------------------------------------------|------|------|---|--------|----|---|---|---|---|---|
| MTG    | N/A | middle temporal gyrus                                  | 4140 | 4132 |   | FF907F | 0  | 0 | 0 | 0 | 0 | 0 |
| MTG    | N/A | middle temporal gyrus, left                            | 4141 | 4140 | L | FF907F | 0  | 0 | 0 | 0 | 0 | 0 |
| *MTG-s | *TL | middle temporal gyrus, left, superior bank of gyrus    | 4142 | 4141 | L | FF907F | 10 | 6 | 4 | 4 | 6 | 5 |
| *MTG-i | *TL | middle temporal gyrus, left, inferior bank of gyrus    | 4143 | 4141 | L | FF907F | 10 | 5 | 5 | 7 | 5 | 6 |
| MTG    | N/A | middle temporal gyrus, right                           | 4144 | 4140 | R | FF907F | 0  | 0 | 0 | 0 | 0 | 0 |
| *MTG-s | *TL | middle temporal gyrus, right, superior bank of gyrus   | 4145 | 4144 | R | FF907F | 10 | 6 | 0 | 0 | 0 | 0 |
| *MTG-i | *TL | middle temporal gyrus, right, inferior bank of gyrus   | 4146 | 4144 | R | FF907F | 11 | 4 | 0 | 0 | 0 | 0 |
| *PLP   | N/A | planum polare                                          | 4177 | 4132 |   | FF937F | 0  | 0 | 0 | 0 | 0 | 0 |
| *PLP   | *TL | planum polare, left                                    | 4178 | 4177 | L | FF937F | 2  | 1 | 3 | 5 | 4 | 2 |
| *PLP   | *TL | planum polare, right                                   | 4179 | 4177 | R | FF937F | 1  | 2 | 0 | 0 | 0 | 0 |
| PLT    | N/A | planum temporale                                       | 4171 | 4132 |   | FF967F | 0  | 0 | 0 | 0 | 0 | 0 |
| PLT    | *TL | planum temporale, left                                 | 4172 | 4171 | L | FF967F | 4  | 1 | 0 | 3 | 0 | 1 |
| PLT    | *TL | planum temporale, right                                | 4173 | 4171 | R | FF967F | 2  | 1 | 0 | 0 | 0 | 0 |
| STG    | N/A | superior temporal gyrus                                | 4133 | 4132 |   | FF997F | 0  | 0 | 0 | 0 | 0 | 0 |
| STG    | N/A | superior temporal gyrus, left                          | 4134 | 4133 | L | FF997F | 0  | 0 | 0 | 0 | 0 | 0 |
| *STG-i | *TL | superior temporal gyrus, left, lateral bank of gyrus   | 4135 | 4134 | L | FF997F | 3  | 2 | 3 | 6 | 4 | 6 |
| *STG-i | *TL | superior temporal gyrus, left, inferior bank of gyrus  | 4136 | 4134 | L | FF997F | 6  | 4 | 3 | 3 | 5 | 5 |
| STG    | N/A | superior temporal gyrus, right                         | 4137 | 4133 | R | FF997F | 0  | 0 | 0 | 0 | 0 | 0 |
| *STG-i | *TL | superior temporal gyrus, right, lateral bank of gyrus  | 4138 | 4137 | R | FF997F | 4  | 0 | 0 | 0 | 0 | 0 |
| *STG-i | *TL | superior temporal gyrus, right, inferior bank of gyrus | 4139 | 4137 | R | FF997F | 5  | 5 | 0 | 0 | 0 | 0 |
| TP     | N/A | temporal pole                                          | 4174 | 4132 |   | FF9C7F | 0  | 0 | 0 | 0 | 0 | 0 |
| TP     | N/A | temporal pole, left                                    | 4175 | 4174 | L | FF9C7F | 0  | 0 | 0 | 0 | 0 | 0 |
| TP-s   | *TL | temporal pole, left, superior aspect                   | 4903 | 4175 | L | FF9C7F | 1  | 2 | 1 | 2 | 0 | 2 |
| TP-i   | *TL | temporal pole, left, inferior aspect                   | 4904 | 4175 | L | FF9C7F | 1  | 1 | 1 | 0 | 0 | 2 |
| TP-m   | *TL | temporal pole, left, medial aspect                     | 4905 | 4175 | L | FF9C7F | 2  | 0 | 1 | 2 | 0 | 1 |
| TP     | N/A | temporal pole, right                                   | 4176 | 4174 | R | FF9C7F | 0  | 0 | 0 | 0 | 0 | 0 |
| TP-s   | *TL | temporal pole, right, superior aspect                  | 4906 | 4176 | R | FF9C7F | 1  | 2 | 0 | 0 | 0 | 0 |
| TP-i   | *TL | temporal pole, right, inferior aspect                  | 4907 | 4176 | R | FF9C7F | 3  | 2 | 0 | 0 | 0 | 0 |
| TP-m   | *TL | temporal pole, right, medial aspect                    | 4908 | 4176 | R | FF9C7F | 1  | 1 | 0 | 0 | 0 | 0 |
| TG     | N/A | transverse gyri                                        | 4168 | 4132 |   | FF9F7F | 0  | 0 | 0 | 0 | 0 | 0 |
| TG     | *TL | transverse gyri, left                                  | 4169 | 4168 | L | FF9F7F | 1  | 0 | 1 | 2 | 2 | 2 |
| TG     | *TL | transverse gyri, right                                 | 4170 | 4168 | R | FF9F7F | 2  | 1 | 0 | 0 | 0 | 0 |

|        |      |                                                         |           |           |   |        |   |   |   |   |   |   |
|--------|------|---------------------------------------------------------|-----------|-----------|---|--------|---|---|---|---|---|---|
| CxN    | N/A  | cerebral nuclei                                         | 4275      | 4007      |   | C96AE6 | 0 | 0 | 0 | 0 | 0 | 0 |
| Amg    | N/A  | amygdala                                                | 4327      | 4275      |   | FF60DE | 0 | 0 | 0 | 0 | 0 | 0 |
| ATZ    | N/A  | amygdalohippocampal transition zone                     | 4328      | 4327      |   | FF60DE | 0 | 0 | 0 | 0 | 0 | 0 |
| ATZ    | *ATZ | amygdalohippocampal transition zone, left               | 4329      | 4328      | L | FF60DE | 2 | 1 | 1 | 1 | 1 | 1 |
| AHiA   | N/A  | amygdalohippocampal area, left                          | 4330      | 4329      | L | FF60DE | 0 | 0 | 0 | 0 | 0 | 0 |
| AHiAm  | N/A  | amygdalohippocampal area, left, magnocellular division  | 265504452 | 4330      | L | FF60DE | 0 | 0 | 0 | 0 | 0 | 0 |
| AHiAp  | N/A  | amygdalohippocampal area, left, parvocellular division  | 265504456 | 4330      | L | FF60DE | 0 | 0 | 0 | 0 | 0 | 0 |
| AHiAml | N/A  | amygdalohippocampal area, left, marginal layer          | 265504460 | 4330      | L | FF60DE | 0 | 0 | 0 | 0 | 0 | 0 |
| ATZ    | *ATZ | amygdalohippocampal transition zone, right              | 4335      | 4328      | R | FF60DE | 0 | 2 | 0 | 0 | 0 | 0 |
| AHiA   | N/A  | amygdalohippocampal area, right                         | 4336      | 4335      | R | FF60DE | 0 | 0 | 0 | 0 | 0 | 0 |
| AHiAm  | N/A  | amygdalohippocampal area, right, magnocellular division | 265504464 | 4336      | R | FF60DE | 0 | 0 | 0 | 0 | 0 | 0 |
| AHiAp  | N/A  | amygdalohippocampal area, right, parvocellular division | 265504468 | 4336      | R | FF60DE | 0 | 0 | 0 | 0 | 0 | 0 |
| AHiAml | N/A  | amygdalohippocampal area, right, marginal layer         | 265504472 | 4336      | R | FF60DE | 0 | 0 | 0 | 0 | 0 | 0 |
| AAA    | N/A  | anterior amygdaloid area                                | 265504476 | 4327      |   | FF60DE | 0 | 0 | 0 | 0 | 0 | 0 |
| AAA    | N/A  | anterior amygdaloid area, left                          | 265504480 | 265504476 | L | FF60DE | 0 | 0 | 0 | 0 | 0 | 0 |
| AAAd   | N/A  | anterior amygdaloid area, left, dorsal division         | 265504484 | 265504480 | L | FF60DE | 0 | 0 | 0 | 0 | 0 | 0 |
| AAAv   | N/A  | anterior amygdaloid area, left, ventral division        | 265504488 | 265504480 | L | FF60DE | 0 | 0 | 0 | 0 | 0 | 0 |
| AAA    | N/A  | anterior amygdaloid area, right                         | 265504492 | 265504476 | R | FF60DE | 0 | 0 | 0 | 0 | 0 | 0 |
| AAAd   | N/A  | anterior amygdaloid area, right, dorsal division        | 265504496 | 265504492 | R | FF60DE | 0 | 0 | 0 | 0 | 0 | 0 |
| AAAv   | N/A  | anterior amygdaloid area, right, ventral division       | 265504500 | 265504492 | R | FF60DE | 0 | 0 | 0 | 0 | 0 | 0 |
| *BLA   | N/A  | basolateral nucleus                                     | 4341      | 4327      |   | FF60DE | 0 | 0 | 0 | 0 | 0 | 0 |
| *BLA   | *BLA | basolateral nucleus, left                               | 4342      | 4341      | L | FF60DE | 2 | 2 | 1 | 1 | 2 | 2 |
| BLAm   | N/A  | basolateral nucleus, left, magnocellular (dorsal)       | 4343      | 4342      | L | FF60DE | 0 | 0 | 0 | 0 | 0 | 0 |
| BLAdl  | N/A  | basolateral nucleus, left, dorsolateral division        | 265504504 | 4343      | L | FF60DE | 0 | 0 | 0 | 0 | 0 | 0 |
| BLAi   | N/A  | basolateral nucleus, left, intermediate                 | 4344      | 4342      | L | FF60DE | 0 | 0 | 0 | 0 | 0 | 0 |
| BLAp   | N/A  | basolateral nucleus, left, parvicellular (ventral)      | 4345      | 4342      | L | FF60DE | 0 | 0 | 0 | 0 | 0 | 0 |

|        |      |                                                     |           |           |   |        |   |   |   |   |   |   |
|--------|------|-----------------------------------------------------|-----------|-----------|---|--------|---|---|---|---|---|---|
| BLAvl  | N/A  | basolateral nucleus, left, ventrolateral division   | 265504508 | 4345      | L | FF60DE | 0 | 0 | 0 | 0 | 0 | 0 |
| BLAvm  | N/A  | basolateral nucleus, left, ventromedial division    | 265504512 | 4345      | L | FF60DE | 0 | 0 | 0 | 0 | 0 | 0 |
| *BLA   | *BLA | basolateral nucleus, right                          | 4346      | 4341      | R | FF60DE | 0 | 3 | 0 | 0 | 0 | 0 |
| BLAm   | N/A  | basolateral nucleus, right, magnocellular (dorsal)  | 4347      | 4346      | R | FF60DE | 0 | 0 | 0 | 0 | 0 | 0 |
| BLAdl  | N/A  | basolateral nucleus, right, dorsolateral division   | 265504516 | 4347      | R | FF60DE | 0 | 0 | 0 | 0 | 0 | 0 |
| BLAi   | N/A  | basolateral nucleus, right, intermediate            | 4348      | 4346      | R | FF60DE | 0 | 0 | 0 | 0 | 0 | 0 |
| BLAp   | N/A  | basolateral nucleus, right, parvicellular (ventral) | 4349      | 4346      | R | FF60DE | 0 | 0 | 0 | 0 | 0 | 0 |
| BLAvl  | N/A  | basolateral nucleus, right, ventrolateral division  | 265504520 | 4349      | R | FF60DE | 0 | 0 | 0 | 0 | 0 | 0 |
| BLAvm  | N/A  | basolateral nucleus, right, ventromedial division   | 265504524 | 4349      | R | FF60DE | 0 | 0 | 0 | 0 | 0 | 0 |
| *BMA   | N/A  | basomedial nucleus                                  | 4350      | 4327      |   | FF60DE | 0 | 0 | 0 | 0 | 0 | 0 |
| *BMA   | *BMA | basomedial nucleus, left                            | 4351      | 4350      | L | FF60DE | 2 | 2 | 1 | 1 | 1 | 2 |
| BMAAd  | N/A  | basomedial nucleus, left, dorsal division           | 265504528 | 4351      | L | FF60DE | 0 | 0 | 0 | 0 | 0 | 0 |
| BMAmc  | N/A  | basomedial nucleus, left, magnocellular division    | 4352      | 265504528 | L | FF60DE | 0 | 0 | 0 | 0 | 0 | 0 |
| BMAAdl | N/A  | basomedial nucleus, left, dorsolateral division     | 265504534 | 265504528 | L | FF60DE | 0 | 0 | 0 | 0 | 0 | 0 |
| BMAAm  | N/A  | basomedial nucleus, left, medial division           | 265504538 | 265504528 | L | FF60DE | 0 | 0 | 0 | 0 | 0 | 0 |
| BMAv   | N/A  | basomedial nucleus, left, ventral division          | 265504542 | 4351      | L | FF60DE | 0 | 0 | 0 | 0 | 0 | 0 |
| BMApc  | N/A  | basomedial nucleus, left, parvicellular division    | 4353      | 265504542 | L | FF60DE | 0 | 0 | 0 | 0 | 0 | 0 |
| BMAvm  | N/A  | basomedial nucleus, left, ventromedial division     | 4354      | 265504542 | L | FF60DE | 0 | 0 | 0 | 0 | 0 | 0 |
| *BMA   | *BMA | basomedial nucleus, right                           | 4355      | 4350      | R | FF60DE | 0 | 3 | 0 | 0 | 0 | 0 |
| BMAAd  | N/A  | basomedial nucleus, right, dorsal division          | 265504550 | 4355      | R | FF60DE | 0 | 0 | 0 | 0 | 0 | 0 |
| BMAmc  | N/A  | basomedial nucleus, right, magnocellular division   | 4356      | 265504550 | R | FF60DE | 0 | 0 | 0 | 0 | 0 | 0 |
| BMAAdl | N/A  | basomedial nucleus, right, dorsolateral division    | 265504556 | 265504550 | R | FF60DE | 0 | 0 | 0 | 0 | 0 | 0 |
| BMAAm  | N/A  | basomedial nucleus, right, medial division          | 265504561 | 265504550 | R | FF60DE | 0 | 0 | 0 | 0 | 0 | 0 |
| BMAv   | N/A  | basomedial nucleus, right, ventral division         | 265504565 | 4355      | R | FF60DE | 0 | 0 | 0 | 0 | 0 | 0 |
| BMApc  | N/A  | basomedial nucleus, right, parvicellular division   | 4357      | 265504565 | R | FF60DE | 0 | 0 | 0 | 0 | 0 | 0 |

|        |       |                                                             |           |           |   |        |   |   |   |   |   |   |
|--------|-------|-------------------------------------------------------------|-----------|-----------|---|--------|---|---|---|---|---|---|
| BMAvm  | N/A   | basomedial nucleus, right, ventromedial division            | 4358      | 265504565 | R | FF60DE | 0 | 0 | 0 | 0 | 0 | 0 |
| *CeA   | N/A   | central nucleus                                             | 4359      | 4327      |   | FF60DE | 0 | 0 | 0 | 0 | 0 | 0 |
| *CeA   | *CeA  | central nucleus, left                                       | 4360      | 4359      | L | FF60DE | 2 | 1 | 2 | 1 | 1 | 1 |
| CeAm   | N/A   | central nucleus, medial division, left                      | 4361      | 4360      | L | FF60DE | 0 | 0 | 0 | 0 | 0 | 0 |
| CeAmd  | N/A   | central nucleus, medial division, left, dorsal part         | 265504574 | 4361      | L | FF60DE | 0 | 0 | 0 | 0 | 0 | 0 |
| CeAmv  | N/A   | central nucleus, medial division, left, ventral part        | 265504578 | 4361      | L | FF60DE | 0 | 0 | 0 | 0 | 0 | 0 |
| CeAl   | N/A   | central nucleus, lateral division, left                     | 4362      | 4360      | L | FF60DE | 0 | 0 | 0 | 0 | 0 | 0 |
| CeAla  | N/A   | central nucleus, lateral division, left, apical part        | 265504583 | 4362      | L | FF60DE | 0 | 0 | 0 | 0 | 0 | 0 |
| CeAlca | N/A   | central nucleus, lateral division, left, capsular part      | 265504587 | 4362      | L | FF60DE | 0 | 0 | 0 | 0 | 0 | 0 |
| CeAlp  | N/A   | central nucleus, lateral division, left, paracapsular part  | 265504591 | 4362      | L | FF60DE | 0 | 0 | 0 | 0 | 0 | 0 |
| CeAlc  | N/A   | central nucleus, lateral division, left, central part       | 265504596 | 4362      | L | FF60DE | 0 | 0 | 0 | 0 | 0 | 0 |
| *CeA   | *CeA  | central nucleus, right                                      | 4363      | 4359      | R | FF60DE | 0 | 1 | 0 | 0 | 0 | 0 |
| CeAm   | N/A   | central nucleus, medial division, right                     | 4364      | 4363      | R | FF60DE | 0 | 0 | 0 | 0 | 0 | 0 |
| CeAmd  | N/A   | central nucleus, medial division, right, dorsal part        | 265504600 | 4364      | R | FF60DE | 0 | 0 | 0 | 0 | 0 | 0 |
| CeAmv  | N/A   | central nucleus, medial division, right, ventral part       | 265504604 | 4364      | R | FF60DE | 0 | 0 | 0 | 0 | 0 | 0 |
| CeAl   | N/A   | central nucleus, lateral division, right                    | 4365      | 4363      | R | FF60DE | 0 | 0 | 0 | 0 | 0 | 0 |
| CeAla  | N/A   | central nucleus, lateral division, right, apical part       | 265504608 | 4365      | R | FF60DE | 0 | 0 | 0 | 0 | 0 | 0 |
| CeAlca | N/A   | central nucleus, lateral division, right, capsular part     | 265504612 | 4365      | R | FF60DE | 0 | 0 | 0 | 0 | 0 | 0 |
| CeAlp  | N/A   | central nucleus, lateral division, right, paracapsular part | 265504616 | 4365      | R | FF60DE | 0 | 0 | 0 | 0 | 0 | 0 |
| CeAlc  | N/A   | central nucleus, lateral division, right, central part      | 265504620 | 4365      | R | FF60DE | 0 | 0 | 0 | 0 | 0 | 0 |
| *COMA  | N/A   | cortico-medial group                                        | 4366      | 4327      |   | FF60DE | 0 | 0 | 0 | 0 | 0 | 0 |
| *COMA  | *COMA | cortico-medial group, left                                  | 4367      | 4366      | L | FF60DE | 2 | 2 | 1 | 1 | 1 | 2 |
| COAa   | N/A   | anterior cortical nucleus, left                             | 4368      | 4367      | L | FF60DE | 0 | 0 | 0 | 0 | 0 | 0 |
| COAad  | N/A   | anterior cortical nucleus, left, dorsal division            | 265504624 | 4368      | L | FF60DE | 0 | 0 | 0 | 0 | 0 | 0 |
| COAav  | N/A   | anterior cortical nucleus, left, ventral division           | 265504628 | 4368      | L | FF60DE | 0 | 0 | 0 | 0 | 0 | 0 |

|       |       |                                                         |           |           |   |        |   |   |   |   |   |   |
|-------|-------|---------------------------------------------------------|-----------|-----------|---|--------|---|---|---|---|---|---|
| COAam | N/A   | anterior cortical nucleus, left, marginal layer         | 265504632 | 4368      | L | FF60DE | 0 | 0 | 0 | 0 | 0 | 0 |
| MA    | N/A   | medial nucleus, left                                    | 4370      | 4367      | L | FF60DE | 0 | 0 | 0 | 0 | 0 | 0 |
| MAa   | N/A   | medial nucleus, left, anterior division                 | 265504636 | 4370      | L | FF60DE | 0 | 0 | 0 | 0 | 0 | 0 |
| MAp   | N/A   | medial nucleus, left, posterior division                | 265504640 | 4370      | L | FF60DE | 0 | 0 | 0 | 0 | 0 | 0 |
| MApd  | N/A   | medial nucleus, left, posterior division, dorsal part   | 265504644 | 265504640 | L | FF60DE | 0 | 0 | 0 | 0 | 0 | 0 |
| MApv  | N/A   | medial nucleus, left, posterior division, ventral part  | 265504648 | 265504640 | L | FF60DE | 0 | 0 | 0 | 0 | 0 | 0 |
| MAm   | N/A   | medial nucleus, left, marginal layer                    | 265504652 | 4370      | L | FF60DE | 0 | 0 | 0 | 0 | 0 | 0 |
| COAp  | N/A   | posterior cortical nucleus, left                        | 4369      | 4367      | L | FF60DE | 0 | 0 | 0 | 0 | 0 | 0 |
| COApd | N/A   | posterior cortical nucleus, left, dorsal division       | 265504656 | 4369      | L | FF60DE | 0 | 0 | 0 | 0 | 0 | 0 |
| COApv | N/A   | posterior cortical nucleus, left, ventral division      | 265504660 | 4369      | L | FF60DE | 0 | 0 | 0 | 0 | 0 | 0 |
| COApm | N/A   | posterior cortical nucleus, left, marginal layer        | 265504664 | 4369      | L | FF60DE | 0 | 0 | 0 | 0 | 0 | 0 |
| *COMA | *COMA | cortico-medial group, right                             | 4371      | 4366      | R | FF60DE | 0 | 2 | 0 | 0 | 0 | 0 |
| COAa  | N/A   | anterior cortical nucleus, right                        | 4372      | 4371      | R | FF60DE | 0 | 0 | 0 | 0 | 0 | 0 |
| COAad | N/A   | anterior cortical nucleus, right, dorsal division       | 265504668 | 4372      | R | FF60DE | 0 | 0 | 0 | 0 | 0 | 0 |
| COAav | N/A   | anterior cortical nucleus, right, ventral division      | 265504672 | 4372      | R | FF60DE | 0 | 0 | 0 | 0 | 0 | 0 |
| COAam | N/A   | anterior cortical nucleus, right, marginal layer        | 265504676 | 4372      | R | FF60DE | 0 | 0 | 0 | 0 | 0 | 0 |
| MA    | N/A   | medial nucleus, right                                   | 4374      | 4371      | R | FF60DE | 0 | 0 | 0 | 0 | 0 | 0 |
| MAa   | N/A   | medial nucleus, right, anterior division                | 265504680 | 4374      | R | FF60DE | 0 | 0 | 0 | 0 | 0 | 0 |
| MAp   | N/A   | medial nucleus, right, posterior division               | 265504684 | 4374      | R | FF60DE | 0 | 0 | 0 | 0 | 0 | 0 |
| MApd  | N/A   | medial nucleus, right, posterior division, dorsal part  | 265504688 | 265504684 | R | FF60DE | 0 | 0 | 0 | 0 | 0 | 0 |
| MApv  | N/A   | medial nucleus, right, posterior division, ventral part | 265504692 | 265504684 | R | FF60DE | 0 | 0 | 0 | 0 | 0 | 0 |
| MAm   | N/A   | medial nucleus, right, marginal layer                   | 265504696 | 4374      | R | FF60DE | 0 | 0 | 0 | 0 | 0 | 0 |
| COAp  | N/A   | posterior cortical nucleus, right                       | 4373      | 4371      | R | FF60DE | 0 | 0 | 0 | 0 | 0 | 0 |
| COApd | N/A   | posterior cortical nucleus, right, dorsal division      | 265504700 | 4373      | R | FF60DE | 0 | 0 | 0 | 0 | 0 | 0 |
| COApv | N/A   | posterior cortical nucleus, right, ventral division     | 265504704 | 4373      | R | FF60DE | 0 | 0 | 0 | 0 | 0 | 0 |
| COApm | N/A   | posterior cortical nucleus, right, marginal layer       | 265504708 | 4373      | R | FF60DE | 0 | 0 | 0 | 0 | 0 | 0 |



|          |     |                                                                 |           |           |   |        |   |   |   |   |   |   |
|----------|-----|-----------------------------------------------------------------|-----------|-----------|---|--------|---|---|---|---|---|---|
| IA       | N/A | intercalated nuclei                                             | 4375      | 4327      |   | FF60DE | 0 | 0 | 0 | 0 | 0 | 0 |
| IA       | N/A | intercalated nuclei, left                                       | 4376      | 4375      | L | FF60DE | 0 | 0 | 0 | 0 | 0 | 0 |
| IA       | N/A | intercalated nuclei, right                                      | 4377      | 4375      | R | FF60DE | 0 | 0 | 0 | 0 | 0 | 0 |
| *LA      | N/A | lateral nucleus                                                 | 4378      | 4327      |   | FF60DE | 0 | 0 | 0 | 0 | 0 | 0 |
| *LA      | *LA | lateral nucleus, left                                           | 4379      | 4378      | L | FF60DE | 4 | 1 | 2 | 1 | 1 | 2 |
| LAd      | N/A | lateral nucleus, left, dorsal division                          | 265504712 | 4379      | L | FF60DE | 0 | 0 | 0 | 0 | 0 | 0 |
| LAda     | N/A | lateral nucleus, left, dorsal anterior division                 | 265504716 | 265504712 | L | FF60DE | 0 | 0 | 0 | 0 | 0 | 0 |
| LAdm     | N/A | lateral nucleus, left, dorsal medial division                   | 4380      | 265504712 | L | FF60DE | 0 | 0 | 0 | 0 | 0 | 0 |
| LAdl     | N/A | lateral nucleus, left, dorsal lateral division                  | 265504722 | 265504712 | L | FF60DE | 0 | 0 | 0 | 0 | 0 | 0 |
| LAdl-com | N/A | lateral nucleus, left, dorsal lateral division, comb-like part  | 265504726 | 265504722 | L | FF60DE | 0 | 0 | 0 | 0 | 0 | 0 |
| LAi      | N/A | lateral nucleus, left, intermediate division                    | 265504730 | 4379      | L | FF60DE | 0 | 0 | 0 | 0 | 0 | 0 |
| LAv      | N/A | lateral nucleus, left, ventral division                         | 265504734 | 4379      | L | FF60DE | 0 | 0 | 0 | 0 | 0 | 0 |
| LAvl     | N/A | lateral nucleus, left, ventral lateral division                 | 4381      | 265504734 | L | FF60DE | 0 | 0 | 0 | 0 | 0 | 0 |
| LAvm     | N/A | lateral nucleus, left, ventral medial division                  | 265504740 | 265504734 | L | FF60DE | 0 | 0 | 0 | 0 | 0 | 0 |
| LAv glo  | N/A | lateral nucleus, left, glomerular division                      | 265504744 | 265504734 | L | FF60DE | 0 | 0 | 0 | 0 | 0 | 0 |
| *LA      | *LA | lateral nucleus, right                                          | 4382      | 4378      | R | FF60DE | 0 | 2 | 0 | 0 | 0 | 0 |
| LAd      | N/A | lateral nucleus, right, dorsal division                         | 265504748 | 4382      | R | FF60DE | 0 | 0 | 0 | 0 | 0 | 0 |
| LAda     | N/A | lateral nucleus, right, dorsal anterior division                | 265504752 | 265504748 | R | FF60DE | 0 | 0 | 0 | 0 | 0 | 0 |
| LAdm     | N/A | lateral nucleus, right, dorsal medial division                  | 4383      | 265504748 | R | FF60DE | 0 | 0 | 0 | 0 | 0 | 0 |
| LAdl     | N/A | lateral nucleus, right, dorsal lateral division                 | 265504758 | 265504748 | R | FF60DE | 0 | 0 | 0 | 0 | 0 | 0 |
| LAdl-com | N/A | lateral nucleus, right, dorsal lateral division, comb-like part | 265504762 | 265504758 | R | FF60DE | 0 | 0 | 0 | 0 | 0 | 0 |
| LAi      | N/A | lateral nucleus, right, intermediate division                   | 265504766 | 4382      | R | FF60DE | 0 | 0 | 0 | 0 | 0 | 0 |
| LAv      | N/A | lateral nucleus, right, ventral division                        | 265504770 | 4382      | R | FF60DE | 0 | 0 | 0 | 0 | 0 | 0 |
| LAvl     | N/A | lateral nucleus, right, ventral lateral division                | 4384      | 265504770 | R | FF60DE | 0 | 0 | 0 | 0 | 0 | 0 |
| LAvm     | N/A | lateral nucleus, right, ventral medial division                 | 265504776 | 265504770 | R | FF60DE | 0 | 0 | 0 | 0 | 0 | 0 |
| LAv glo  | N/A | lateral nucleus, right, glomerular division                     | 265504780 | 265504770 | R | FF60DE | 0 | 0 | 0 | 0 | 0 | 0 |
| NLOT     | N/A | nucleus of the lateral olfactory tract                          | 4385      | 4327      |   | FF60DE | 0 | 0 | 0 | 0 | 0 | 0 |
| NLOT     | N/A | nucleus of the lateral olfactory tract, left                    | 4386      | 4385      | L | FF60DE | 0 | 0 | 0 | 0 | 0 | 0 |
| NLOT     | N/A | nucleus of the lateral olfactory tract, right                   | 4387      | 4385      | R | FF60DE | 0 | 0 | 0 | 0 | 0 | 0 |
| PLA      | N/A | paralamina nucleus                                              | 4388      | 4327      |   | FF60DE | 0 | 0 | 0 | 0 | 0 | 0 |
| PLA      | N/A | paralamina nucleus, left                                        | 4389      | 4388      | L | FF60DE | 0 | 0 | 0 | 0 | 0 | 0 |
| PLA glo  | N/A | paralamina nucleus, left, glomerular part                       | 265504784 | 4389      | L | FF60DE | 0 | 0 | 0 | 0 | 0 | 0 |
| PLA      | N/A | paralamina nucleus, right                                       | 4390      | 4388      | R | FF60DE | 0 | 0 | 0 | 0 | 0 | 0 |
| PLA glo  | N/A | paralamina nucleus, right, glomerular part                      | 265504788 | 4390      | R | FF60DE | 0 | 0 | 0 | 0 | 0 | 0 |
| AO       | N/A | anterior olfactory nucleus                                      | 4324      | 4275      |   | CC4DB2 | 0 | 0 | 0 | 0 | 0 | 0 |
| AO       | N/A | anterior olfactory nucleus, left                                | 4325      | 4324      | L | CC4DB2 | 0 | 0 | 0 | 0 | 0 | 0 |
| AO       | N/A | anterior olfactory nucleus, right                               | 4326      | 4324      | R | CC4DB2 | 0 | 0 | 0 | 0 | 0 | 0 |

|      |      |                                                          |           |       |   |        |   |   |   |   |   |   |
|------|------|----------------------------------------------------------|-----------|-------|---|--------|---|---|---|---|---|---|
| BF   | N/A  | basal forebrain                                          | 4300      | 4275  |   | D168FF | 0 | 0 | 0 | 0 | 0 | 0 |
| SptN | N/A  | septal nuclei                                            | 13002     | 4300  |   | D168FF | 0 | 0 | 0 | 0 | 0 | 0 |
| SptN | SptN | septal nuclei, left                                      | 4301      | 13002 | L | D168FF | 1 | 3 | 2 | 2 | 0 | 2 |
| MS   | N/A  | medial septal nucleus, left                              | 4302      | 4301  | L | D168FF | 0 | 0 | 0 | 0 | 0 | 0 |
| LS   | N/A  | lateral septal nucleus, left                             | 4303      | 4301  | L | D168FF | 0 | 0 | 0 | 0 | 0 | 0 |
| SptN | SptN | septal nuclei, right                                     | 4304      | 13002 | R | D168FF | 1 | 3 | 0 | 0 | 0 | 0 |
| MS   | N/A  | medial septal nucleus, right                             | 4305      | 4304  | R | D168FF | 0 | 0 | 0 | 0 | 0 | 0 |
| LS   | N/A  | lateral septal nucleus, right                            | 4306      | 4304  | R | D168FF | 0 | 0 | 0 | 0 | 0 | 0 |
| SI   | N/A  | substantia innominata                                    | 13003     | 4300  |   | D168FF | 0 | 0 | 0 | 0 | 0 | 0 |
| SI   | SI   | substantia innominata, left                              | 4307      | 13003 | L | D168FF | 3 | 2 | 0 | 0 | 0 | 0 |
| nbM  | nbM  | basal nucleus of meynert, left                           | 4308      | 4307  | L | D168FF | 0 | 0 | 1 | 2 | 2 | 4 |
| DB   | N/A  | nucleus of the diagonal band, left                       | 4309      | 4307  | L | D168FF | 0 | 0 | 0 | 0 | 0 | 0 |
| DBv  | DBv  | nucleus of the diagonal band, left, horizontal division  | 4310      | 4309  | L | D168FF | 0 | 0 | 1 | 1 | 1 | 2 |
| DBh  | DBh  | nucleus of the diagonal band, left, vertical division    | 4311      | 4309  | L | D168FF | 0 | 0 | 1 | 1 | 1 | 1 |
| Nac  | N/A  | nucleus of the anterior commissure, left                 | 4312      | 4307  | L | D168FF | 0 | 0 | 0 | 0 | 0 | 0 |
| BST  | BST  | bed nucleus of stria terminalis, left                    | 4313      | 4307  | L | D168FF | 0 | 0 | 1 | 2 | 1 | 1 |
| OlfT | OlfT | olfactory tubercle, left                                 | 10145     | 4307  | L | D168FF | 0 | 0 | 1 | 1 | 1 | 2 |
| IslC | N/A  | islands of calleja, left                                 | 265504792 | 10145 | L | D168FF | 0 | 0 | 0 | 0 | 0 | 0 |
| SI   | SI   | substantia innominata, right                             | 4314      | 13003 | R | D168FF | 2 | 2 | 0 | 0 | 0 | 0 |
| nbM  | N/A  | basal nucleus of meynert, right                          | 4315      | 4314  | R | D168FF | 0 | 0 | 0 | 0 | 0 | 0 |
| DB   | N/A  | nucleus of the diagonal band, right                      | 4316      | 4314  | R | D168FF | 0 | 0 | 0 | 0 | 0 | 0 |
| DBv  | N/A  | nucleus of the diagonal band, right, horizontal division | 4317      | 4316  | R | D168FF | 0 | 0 | 0 | 0 | 0 | 0 |
| DBh  | N/A  | nucleus of the diagonal band, right, vertical division   | 4318      | 4316  | R | D168FF | 0 | 0 | 0 | 0 | 0 | 0 |
| Nac  | N/A  | nucleus of the anterior commissure, right                | 4319      | 4314  | R | D168FF | 0 | 0 | 0 | 0 | 0 | 0 |
| BST  | N/A  | bed nucleus of stria terminalis, right                   | 4320      | 4314  | R | D168FF | 0 | 0 | 0 | 0 | 0 | 0 |
| OlfT | N/A  | olfactory tubercle, right                                | 10146     | 4314  | R | D168FF | 0 | 0 | 0 | 0 | 0 | 0 |
| IslC | N/A  | islands of calleja, right                                | 265504796 | 10146 | R | D168FF | 0 | 0 | 0 | 0 | 0 | 0 |
| BG   | N/A  | basal ganglia                                            | 4276      | 4275  |   | 9257F3 | 0 | 0 | 0 | 0 | 0 | 0 |
| GP   | N/A  | globus pallidus                                          | 4293      | 4276  |   | 9C53E8 | 0 | 0 | 0 | 0 | 0 | 0 |
| GPe  | N/A  | globus pallidus, external segment                        | 12897     | 4293  |   | 9C53E8 | 0 | 0 | 0 | 0 | 0 | 0 |
| GPe  | GPe  | globus pallidus, external segment, left                  | 4295      | 12897 | L | 9C53E8 | 3 | 5 | 2 | 0 | 2 | 3 |
| GPe  | GPe  | globus pallidus, external segment, right                 | 4298      | 12897 | R | 9C53E8 | 3 | 5 | 0 | 0 | 0 | 0 |
| *GPi | N/A  | globus pallidus, internal segment                        | 12898     | 4293  |   | 9C53E8 | 0 | 0 | 0 | 0 | 0 | 0 |
| *GPi | *GPi | globus pallidus, internal segment, left                  | 4296      | 12898 | L | 9C53E8 | 2 | 2 | 2 | 1 | 1 | 2 |
| *GPi | *GPi | globus pallidus, internal segment, right                 | 4299      | 12898 | R | 9C53E8 | 2 | 2 | 0 | 0 | 0 | 0 |
| Str  | N/A  | striatum                                                 | 4277      | 4276  |   | 895BFF | 0 | 0 | 0 | 0 | 0 | 0 |

|      |      |                                                          |       |       |   |        |    |   |   |    |   |   |
|------|------|----------------------------------------------------------|-------|-------|---|--------|----|---|---|----|---|---|
| Cd   | N/A  | caudate nucleus                                          | 4278  | 4277  |   | 895BFF | 0  | 0 | 0 | 0  | 0 | 0 |
| BCd  | N/A  | body of the caudate nucleus                              | 12899 | 4278  |   | 895BFF | 0  | 0 | 0 | 0  | 0 | 0 |
| BCd  | BCd  | body of caudate nucleus, left                            | 4282  | 12899 | L | 895BFF | 0  | 5 | 4 | 5  | 4 | 4 |
| BCd  | BCd  | body of caudate nucleus, right                           | 4286  | 12899 | R | 895BFF | 0  | 7 | 0 | 0  | 0 | 0 |
| *HCd | N/A  | head of the caudate nucleus                              | 12900 | 4278  |   | 895BFF | 0  | 0 | 0 | 0  | 0 | 0 |
| *HCd | *HCd | head of caudate nucleus, left                            | 4280  | 12900 | L | 895BFF | 9  | 4 | 3 | 3  | 2 | 4 |
| *HCd | *HCd | head of caudate nucleus, right                           | 4284  | 12900 | R | 895BFF | 11 | 2 | 0 | 0  | 0 | 0 |
| *TCd | N/A  | tail of the caudate nucleus                              | 12901 | 4278  |   | 895BFF | 0  | 0 | 0 | 0  | 0 | 0 |
| *TCd | *TCd | tail of caudate nucleus, left                            | 4281  | 12901 | L | 895BFF | 2  | 2 | 2 | 3  | 3 | 3 |
| *TCd | *TCd | tail of caudate nucleus, right                           | 4285  | 12901 | R | 895BFF | 4  | 4 | 0 | 0  | 0 | 0 |
| *Acb | N/A  | nucleus accumbens                                        | 4290  | 4277  |   | 895BFF | 0  | 0 | 0 | 0  | 0 | 0 |
| *Acb | *Acb | nucleus accumbens, left                                  | 4291  | 4290  | L | 895BFF | 1  | 4 | 2 | 2  | 2 | 2 |
| *Acb | *Acb | nucleus accumbens, right                                 | 4292  | 4290  | R | 895BFF | 1  | 3 | 0 | 0  | 0 | 0 |
| *Pu  | N/A  | putamen                                                  | 4287  | 4277  |   | 895BFF | 0  | 0 | 0 | 0  | 0 | 0 |
| *Pu  | *Pu  | putamen, left                                            | 4288  | 4287  | L | 895BFF | 11 | 8 | 5 | 10 | 7 | 5 |
| *Pu  | *Pu  | putamen, right                                           | 4289  | 4287  | R | 895BFF | 8  | 6 | 0 | 0  | 0 | 0 |
| *Cl  | N/A  | claustrum                                                | 4321  | 4275  |   | C0A7FF | 0  | 0 | 0 | 0  | 0 | 0 |
| *Cl  | *Cl  | claustrum, left                                          | 4322  | 4321  | L | C0A7FF | 8  | 6 | 5 | 7  | 5 | 2 |
| *Cl  | *Cl  | claustrum, right                                         | 4323  | 4321  | R | C0A7FF | 9  | 5 | 0 | 0  | 0 | 0 |
| DiE  | N/A  | diencephalon                                             | 4391  | 4006  |   | 94F66E | 0  | 0 | 0 | 0  | 0 | 0 |
| ET   | N/A  | epithalamus                                              | 4520  | 4391  |   | 7AE872 | 0  | 0 | 0 | 0  | 0 | 0 |
| Hb   | N/A  | habenular nuclei                                         | 4521  | 4520  |   | 85E872 | 0  | 0 | 0 | 0  | 0 | 0 |
| Hb   | N/A  | habenular nuclei, left                                   | 4522  | 4521  | L | 85E872 | 0  | 0 | 0 | 0  | 0 | 0 |
| HI   | HI   | lateral habenular nucleus, left                          | 4524  | 4522  | L | 85E872 | 0  | 0 | 1 | 0  | 0 | 1 |
| Hlm  | N/A  | lateral habenular nucleus, left, magnocellular division  | 4525  | 4524  | L | 85E872 | 0  | 0 | 0 | 0  | 0 | 0 |
| Hlp  | N/A  | lateral habenular nucleus, left, parvocellular division  | 4526  | 4524  | L | 85E872 | 0  | 0 | 0 | 0  | 0 | 0 |
| Hm   | Hm   | medial habenular nucleus, left                           | 4523  | 4522  | L | 85E872 | 0  | 0 | 1 | 0  | 0 | 0 |
| Hb   | N/A  | habenular nuclei, right                                  | 4527  | 4521  | R | 85E872 | 0  | 0 | 0 | 0  | 0 | 0 |
| HI   | HI   | lateral habenular nucleus, right                         | 4529  | 4527  | R | 85E872 | 1  | 0 | 0 | 0  | 0 | 0 |
| Hlm  | N/A  | lateral habenular nucleus, right, magnocellular division | 4530  | 4529  | R | 85E872 | 0  | 0 | 0 | 0  | 0 | 0 |
| Hlp  | N/A  | lateral habenular nucleus, right, parvocellular division | 4531  | 4529  | R | 85E872 | 0  | 0 | 0 | 0  | 0 | 0 |
| Hm   | Hm   | medial habenular nucleus, right                          | 4528  | 4527  | R | 85E872 | 1  | 0 | 0 | 0  | 0 | 0 |
| *Pa  | N/A  | paraventricular nuclei of thalamus                       | 4533  | 4520  |   | 7AE872 | 0  | 0 | 0 | 0  | 0 | 0 |
| *Pa  | **Pa | paraventricular nuclei, left of thalamus, left           | 4534  | 4533  | L | 7AE872 | 3  | 1 | 0 | 1  | 0 | 0 |
| PARA | N/A  | anterior paraventricular nucleus of thalamus, left       | 4535  | 4534  | L | 7AE872 | 0  | 0 | 0 | 0  | 0 | 0 |

|       |      |                                                                                                   |       |       |   |        |   |   |   |   |   |   |
|-------|------|---------------------------------------------------------------------------------------------------|-------|-------|---|--------|---|---|---|---|---|---|
| PARP  | N/A  | posterior paraventricular nucleus of thalamus, left                                               | 4536  | 4534  | L | 7AE872 | 0 | 0 | 0 | 0 | 0 | 0 |
| *Pa   | **Pa | paraventricular nuclei, right of thalamus, right                                                  | 4537  | 4533  | R | 7AE872 | 3 | 1 | 0 | 0 | 0 | 0 |
| PARA  | N/A  | anterior paraventricular nucleus of thalamus, right                                               | 4538  | 4537  | R | 7AE872 | 0 | 0 | 0 | 0 | 0 | 0 |
| PARP  | N/A  | posterior paraventricular nucleus of thalamus, right                                              | 4539  | 4537  | R | 7AE872 | 0 | 0 | 0 | 0 | 0 | 0 |
| PIN   | PIN  | pineal gland                                                                                      | 4532  | 4520  |   | 72E875 | 0 | 0 | 0 | 1 | 0 | 0 |
| Hy    | N/A  | hypothalamus                                                                                      | 4540  | 4391  |   | 7FFF90 | 0 | 0 | 0 | 0 | 0 | 0 |
| AHR   | N/A  | anterior hypothalamic region                                                                      | 4570  | 4540  |   | 7FFF84 | 0 | 0 | 0 | 0 | 0 | 0 |
| AHA   | N/A  | anterior hypothalamic area                                                                        | 12902 | 4570  |   | 7FFF84 | 0 | 0 | 0 | 0 | 0 | 0 |
| AHA   | AHA  | anterior hypothalamic area, left                                                                  | 4598  | 12902 | L | 7FFF84 | 0 | 1 | 0 | 1 | 0 | 0 |
| AHAA  | N/A  | anterior hypothalamic area, left, anterior part                                                   | 4599  | 4598  | L | 7FFF84 | 0 | 0 | 0 | 0 | 0 | 0 |
| AHC   | N/A  | anterior hypothalamic area, left, central part                                                    | 4600  | 4598  | L | 7FFF84 | 0 | 0 | 0 | 0 | 0 | 0 |
| AHA   | AHA  | anterior hypothalamic area, right                                                                 | 4629  | 12902 | R | 7FFF84 | 0 | 1 | 0 | 0 | 0 | 0 |
| AHAA  | N/A  | anterior hypothalamic area, right, anterior part                                                  | 4630  | 4629  | R | 7FFF84 | 0 | 0 | 0 | 0 | 0 | 0 |
| AHC   | N/A  | anterior hypothalamic area, right, central part                                                   | 4631  | 4629  | R | 7FFF84 | 0 | 0 | 0 | 0 | 0 | 0 |
| AHN   | N/A  | anterior hypothalamic nucleus                                                                     | 12903 | 4570  |   | 7FFF84 | 0 | 0 | 0 | 0 | 0 | 0 |
| AHN   | N/A  | anterior hypothalamic nucleus, left                                                               | 4601  | 12903 | L | 7FFF84 | 0 | 0 | 0 | 0 | 0 | 0 |
| AHN   | N/A  | anterior hypothalamic nucleus, right                                                              | 4632  | 12903 | R | 7FFF84 | 0 | 0 | 0 | 0 | 0 | 0 |
| LHA   | N/A  | lateral hypothalamic area, anterior region                                                        | 12904 | 4570  |   | 7FFF84 | 0 | 0 | 0 | 0 | 0 | 0 |
| LHA   | LHA  | lateral hypothalamic area, anterior region, left                                                  | 4596  | 12904 | L | 7FFF84 | 1 | 2 | 1 | 1 | 0 | 1 |
| LHA   | LHA  | lateral hypothalamic area, anterior region, right                                                 | 4627  | 12904 | R | 7FFF84 | 1 | 2 | 0 | 0 | 0 | 0 |
| PVH   | N/A  | paraventricular nucleus of the hypothalamus                                                       | 12905 | 4570  |   | 7FFF84 | 0 | 0 | 0 | 0 | 0 | 0 |
| PVH   | PVH  | paraventricular nucleus of the hypothalamus, left                                                 | 4573  | 12905 | L | 7FFF84 | 0 | 2 | 1 | 2 | 1 | 1 |
| SPZ   | N/A  | subparaventricular zone, left                                                                     | 4574  | 4573  | L | 7FFF84 | 0 | 0 | 0 | 0 | 0 | 0 |
| PVHd  | N/A  | paraventricular nucleus of the hypothalamus, left, descending division                            | 4575  | 4573  | L | 7FFF84 | 0 | 0 | 0 | 0 | 0 | 0 |
| PVHdp | N/A  | paraventricular nucleus of the hypothalamus, left, descending division, dorsal parvicellular part | 4577  | 4575  | L | 7FFF84 | 0 | 0 | 0 | 0 | 0 | 0 |

|        |     |                                                                                                                       |      |       |   |        |   |   |   |   |   |   |
|--------|-----|-----------------------------------------------------------------------------------------------------------------------|------|-------|---|--------|---|---|---|---|---|---|
| PVHf   | N/A | paraventricular nucleus of the hypothalamus, left, descending division, forniceal part                                | 4579 | 4575  | L | 7FFF84 | 0 | 0 | 0 | 0 | 0 | 0 |
| PVHlp  | N/A | paraventricular nucleus of the hypothalamus, left, descending division, lateral parvicellular part                    | 4578 | 4575  | L | 7FFF84 | 0 | 0 | 0 | 0 | 0 | 0 |
| PVHmpv | N/A | paraventricular nucleus of the hypothalamus, left, descending division, medial parvicellular part, ventral zone       | 4576 | 4575  | L | 7FFF84 | 0 | 0 | 0 | 0 | 0 | 0 |
| PVHm   | N/A | paraventricular nucleus of the hypothalamus, left, magnocellular division                                             | 4580 | 4573  | L | 7FFF84 | 0 | 0 | 0 | 0 | 0 | 0 |
| PVHam  | N/A | paraventricular nucleus of the hypothalamus, left, magnocellular division, anterior magnocellular part                | 4581 | 4580  | L | 7FFF84 | 0 | 0 | 0 | 0 | 0 | 0 |
| PVHmm  | N/A | paraventricular nucleus of the hypothalamus, left, magnocellular division, medial magnocellular part                  | 4582 | 4580  | L | 7FFF84 | 0 | 0 | 0 | 0 | 0 | 0 |
| PVHpm  | N/A | paraventricular nucleus of the hypothalamus, left, magnocellular division, posterior magnocellular part               | 4583 | 4580  | L | 7FFF84 | 0 | 0 | 0 | 0 | 0 | 0 |
| PVHpml | N/A | paraventricular nucleus of the hypothalamus, left, magnocellular division, posterior magnocellular part, lateral zone | 4585 | 4583  | L | 7FFF84 | 0 | 0 | 0 | 0 | 0 | 0 |
| PVHpmm | N/A | paraventricular nucleus of the hypothalamus, left, magnocellular division, posterior magnocellular part, medial zone  | 4584 | 4583  | L | 7FFF84 | 0 | 0 | 0 | 0 | 0 | 0 |
| PVHp   | N/A | paraventricular nucleus of the hypothalamus, left, parvicellular division                                             | 4586 | 4573  | L | 7FFF84 | 0 | 0 | 0 | 0 | 0 | 0 |
| PVHap  | N/A | paraventricular nucleus of the hypothalamus, left, parvicellular division, anterior parvicellular part                | 4587 | 4586  | L | 7FFF84 | 0 | 0 | 0 | 0 | 0 | 0 |
| PVHmpd | N/A | paraventricular nucleus of the hypothalamus, left, parvicellular division, medial parvicellular part, dorsal zone     | 4588 | 4586  | L | 7FFF84 | 0 | 0 | 0 | 0 | 0 | 0 |
| PVHpv  | N/A | paraventricular nucleus of the hypothalamus, left, parvicellular division, periventricular part                       | 4589 | 4586  | L | 7FFF84 | 0 | 0 | 0 | 0 | 0 | 0 |
| PVH    | PVH | paraventricular nucleus of the hypothalamus, right                                                                    | 4604 | 12905 | R | 7FFF84 | 0 | 2 | 0 | 0 | 0 | 0 |
| SPZ    | N/A | subparaventricular zone, right                                                                                        | 4605 | 4604  | R | 7FFF84 | 0 | 0 | 0 | 0 | 0 | 0 |

|        |     |                                                                                                                        |      |      |   |        |   |   |   |   |   |   |
|--------|-----|------------------------------------------------------------------------------------------------------------------------|------|------|---|--------|---|---|---|---|---|---|
| PVHd   | N/A | paraventricular nucleus of the hypothalamus, right, descending division                                                | 4606 | 4604 | R | 7FFF84 | 0 | 0 | 0 | 0 | 0 | 0 |
| PVHdp  | N/A | paraventricular nucleus of the hypothalamus, right, descending division, dorsal parvicellular part                     | 4608 | 4606 | R | 7FFF84 | 0 | 0 | 0 | 0 | 0 | 0 |
| PVHf   | N/A | paraventricular nucleus of the hypothalamus, right, descending division, forniceal part                                | 4610 | 4606 | R | 7FFF84 | 0 | 0 | 0 | 0 | 0 | 0 |
| PVHlp  | N/A | paraventricular nucleus of the hypothalamus, right, descending division, lateral parvicellular part                    | 4609 | 4606 | R | 7FFF84 | 0 | 0 | 0 | 0 | 0 | 0 |
| PVHmpv | N/A | paraventricular nucleus of the hypothalamus, right, descending division, medial parvicellular part, ventral zone       | 4607 | 4606 | R | 7FFF84 | 0 | 0 | 0 | 0 | 0 | 0 |
| PVHm   | N/A | paraventricular nucleus of the hypothalamus, right, magnocellular division                                             | 4611 | 4604 | R | 7FFF84 | 0 | 0 | 0 | 0 | 0 | 0 |
| PVHam  | N/A | paraventricular nucleus of the hypothalamus, right, magnocellular division, anterior magnocellular part                | 4612 | 4611 | R | 7FFF84 | 0 | 0 | 0 | 0 | 0 | 0 |
| PVHmm  | N/A | paraventricular nucleus of the hypothalamus, right, magnocellular division, medial magnocellular part                  | 4613 | 4611 | R | 7FFF84 | 0 | 0 | 0 | 0 | 0 | 0 |
| PVHpm  | N/A | paraventricular nucleus of the hypothalamus, right, magnocellular division, posterior magnocellular part               | 4614 | 4611 | R | 7FFF84 | 0 | 0 | 0 | 0 | 0 | 0 |
| PVHpmI | N/A | paraventricular nucleus of the hypothalamus, right, magnocellular division, posterior magnocellular part, lateral zone | 4616 | 4614 | R | 7FFF84 | 0 | 0 | 0 | 0 | 0 | 0 |
| PVHpmM | N/A | paraventricular nucleus of the hypothalamus, right, magnocellular division, posterior magnocellular part, medial zone  | 4615 | 4614 | R | 7FFF84 | 0 | 0 | 0 | 0 | 0 | 0 |
| PVHp   | N/A | paraventricular nucleus of the hypothalamus, right, parvicellular division                                             | 4617 | 4604 | R | 7FFF84 | 0 | 0 | 0 | 0 | 0 | 0 |
| PVHap  | N/A | paraventricular nucleus of the hypothalamus, right, parvicellular division, anterior parvicellular part                | 4618 | 4617 | R | 7FFF84 | 0 | 0 | 0 | 0 | 0 | 0 |

|        |       |                                                                                                                    |       |       |   |        |   |   |   |   |   |   |
|--------|-------|--------------------------------------------------------------------------------------------------------------------|-------|-------|---|--------|---|---|---|---|---|---|
| PVHmpd | N/A   | paraventricular nucleus of the hypothalamus, right, parvicellular division, medial parvicellular part, dorsal zone | 4619  | 4617  | R | 7FFF84 | 0 | 0 | 0 | 0 | 0 | 0 |
| PVHpv  | N/A   | paraventricular nucleus of the hypothalamus, right, parvicellular division, periventricular part                   | 4620  | 4617  | R | 7FFF84 | 0 | 0 | 0 | 0 | 0 | 0 |
| PVa    | N/A   | periventricular nucleus of the hypothalamus, anterior part                                                         | 12906 | 4570  |   | 7FFF84 | 0 | 0 | 0 | 0 | 0 | 0 |
| PVa    | N/A   | periventricular nucleus of the hypohalamus, anterior part, left                                                    | 4572  | 12906 | L | 7FFF84 | 0 | 0 | 0 | 0 | 0 | 0 |
| PVa    | N/A   | periventricular nucleus of the hypohalamus, anterior part, right                                                   | 4603  | 12906 | R | 7FFF84 | 0 | 0 | 0 | 0 | 0 | 0 |
| SO     | N/A   | supraoptic nucleus                                                                                                 | 12907 | 4570  |   | 7FFF84 | 0 | 0 | 0 | 0 | 0 | 0 |
| SO     | SO    | supraoptic nucleus, left                                                                                           | 4593  | 12907 | L | 7FFF84 | 1 | 1 | 1 | 2 | 0 | 1 |
| SODL   | N/A   | supraoptic nucleus, left, dorsolateral part                                                                        | 4594  | 4593  | L | 7FFF84 | 0 | 0 | 0 | 0 | 0 | 0 |
| SOVM   | N/A   | supraoptic nucleus, left, ventromedial part                                                                        | 4595  | 4593  | L | 7FFF84 | 0 | 0 | 0 | 0 | 0 | 0 |
| SO     | SO    | supraoptic nucleus, right                                                                                          | 4624  | 12907 | R | 7FFF84 | 1 | 1 | 0 | 0 | 0 | 0 |
| SODL   | N/A   | supraoptic nucleus, right, dorsolateral part                                                                       | 4625  | 4624  | R | 7FFF84 | 0 | 0 | 0 | 0 | 0 | 0 |
| SOVM   | N/A   | supraoptic nucleus, right, ventromedial part                                                                       | 4626  | 4624  | R | 7FFF84 | 0 | 0 | 0 | 0 | 0 | 0 |
| SCN    | N/A   | suprachiasmatic nucleus                                                                                            | 12908 | 4570  |   | 7FFF84 | 0 | 0 | 0 | 0 | 0 | 0 |
| SCN    | N/A   | suprachiasmatic nucleus, left                                                                                      | 4590  | 12908 | L | 7FFF84 | 0 | 0 | 0 | 0 | 0 | 0 |
| SCNd   | N/A   | suprachiasmatic nucleus, left, dorsomedial part                                                                    | 4591  | 4590  | L | 7FFF84 | 0 | 0 | 0 | 0 | 0 | 0 |
| SCNv   | N/A   | suprachiasmatic nucleus, left, ventrolateral part                                                                  | 4592  | 4590  | L | 7FFF84 | 0 | 0 | 0 | 0 | 0 | 0 |
| SCN    | N/A   | suprachiasmatic nucleus, right                                                                                     | 4621  | 12908 | R | 7FFF84 | 0 | 0 | 0 | 0 | 0 | 0 |
| SCNd   | N/A   | suprachiasmatic nucleus, right, dorsomedial part                                                                   | 4622  | 4621  | R | 7FFF84 | 0 | 0 | 0 | 0 | 0 | 0 |
| SCNv   | N/A   | suprachiasmatic nucleus, right, ventrolateral part                                                                 | 4623  | 4621  | R | 7FFF84 | 0 | 0 | 0 | 0 | 0 | 0 |
| MamR   | N/A   | mammillary region                                                                                                  | 4665  | 4540  |   | 7FFF89 | 0 | 0 | 0 | 0 | 0 | 0 |
| LHM    | N/A   | lateral hypothalamic area, mammillary region                                                                       | 13004 | 4665  |   | 7FFF89 | 0 | 0 | 0 | 0 | 0 | 0 |
| LHM    | LHM   | lateral hypothalamic area, mammillary region, left                                                                 | 13005 | 13004 | L | 7FFF89 | 0 | 0 | 1 | 1 | 1 | 1 |
| PalHy  | PalHy | pallidohypothalamic nucleus, left                                                                                  | 4597  | 13005 | L | 7FFF89 | 0 | 0 | 0 | 1 | 1 | 1 |
| LHM    | N/A   | lateral hypothalamic area, mammillary region, right                                                                | 13006 | 13004 | R | 7FFF89 | 0 | 0 | 0 | 0 | 0 | 0 |
| PalHy  | N/A   | pallidohypothalamic nucleus, right                                                                                 | 4628  | 13006 | R | 7FFF89 | 0 | 0 | 0 | 0 | 0 | 0 |
| MB     | N/A   | mammillary body                                                                                                    | 12909 | 4665  |   | 7FFF89 | 0 | 0 | 0 | 0 | 0 | 0 |

|      |      |                                                  |           |       |   |        |   |   |   |   |   |   |
|------|------|--------------------------------------------------|-----------|-------|---|--------|---|---|---|---|---|---|
| MB   | MB   | mammillary body, left                            | 4671      | 12909 | L | 7FFF89 | 0 | 1 | 0 | 0 | 0 | 0 |
| LM   | LM   | lateral mammillary nucleus, left                 | 4675      | 4671  | L | 7FFF89 | 0 | 0 | 1 | 1 | 1 | 1 |
| MM   | MM   | medial mammillary nucleus, left                  | 4672      | 4671  | L | 7FFF89 | 0 | 0 | 1 | 2 | 2 | 1 |
| MMI  | N/A  | medial mammillary nucleus, left, lateral part    | 4673      | 4672  | L | 7FFF89 | 0 | 0 | 0 | 0 | 0 | 0 |
| MMm  | N/A  | medial mammillary nucleus, left, medial part     | 4674      | 4672  | L | 7FFF89 | 0 | 0 | 0 | 0 | 0 | 0 |
| MMb  | N/A  | medial mammillary nucleus, left, basal division  | 265504804 | 4672  | L | 7FFF89 | 0 | 0 | 0 | 0 | 0 | 0 |
| PMm  | N/A  | preammillary nucleus, left                       | 4676      | 4671  | L | 7FFF89 | 0 | 0 | 0 | 0 | 0 | 0 |
| PMD  | N/A  | preammillary nucleus, left, dorsal part          | 4677      | 4676  | L | 7FFF89 | 0 | 0 | 0 | 0 | 0 | 0 |
| PMV  | N/A  | preammillary nucleus, left, ventral part         | 4678      | 4676  | L | 7FFF89 | 0 | 0 | 0 | 0 | 0 | 0 |
| MB   | MB   | mammillary body, right                           | 4685      | 12909 | R | 7FFF89 | 0 | 1 | 0 | 0 | 0 | 0 |
| LM   | N/A  | lateral mammillary nucleus, right                | 4689      | 4685  | R | 7FFF89 | 0 | 0 | 0 | 0 | 0 | 0 |
| MM   | N/A  | medial mammillary nucleus, right                 | 4686      | 4685  | R | 7FFF89 | 0 | 0 | 0 | 0 | 0 | 0 |
| MMI  | N/A  | medial mammillary nucleus, right, lateral part   | 4687      | 4686  | R | 7FFF89 | 0 | 0 | 0 | 0 | 0 | 0 |
| MMm  | N/A  | medial mammillary nucleus, right, medial part    | 4688      | 4686  | R | 7FFF89 | 0 | 0 | 0 | 0 | 0 | 0 |
| MMb  | N/A  | medial mammillary nucleus, right, basal division | 265504808 | 4686  | R | 7FFF89 | 0 | 0 | 0 | 0 | 0 | 0 |
| PMm  | N/A  | preammillary nucleus, right                      | 4690      | 4685  | R | 7FFF89 | 0 | 0 | 0 | 0 | 0 | 0 |
| PMD  | N/A  | preammillary nucleus, right, dorsal part         | 4691      | 4690  | R | 7FFF89 | 0 | 0 | 0 | 0 | 0 | 0 |
| PMV  | N/A  | preammillary nucleus, right, ventral part        | 4692      | 4690  | R | 7FFF89 | 0 | 0 | 0 | 0 | 0 | 0 |
| *PHA | N/A  | posterior hypothalamic area                      | 12910     | 4665  |   | 7FFF89 | 0 | 0 | 0 | 0 | 0 | 0 |
| *PHA | *PHA | posterior hypothalamic area, left                | 4679      | 12910 | L | 7FFF89 | 2 | 1 | 1 | 1 | 1 | 1 |
| *PHA | *PHA | posterior hypothalamic area, right               | 4693      | 12910 | R | 7FFF89 | 1 | 1 | 0 | 0 | 0 | 0 |
| SuM  | N/A  | supramammillary nucleus                          | 12911     | 4665  |   | 7FFF89 | 0 | 0 | 0 | 0 | 0 | 0 |
| SuM  | SuM  | supramammillary nucleus, left                    | 4669      | 12911 | L | 7FFF89 | 0 | 0 | 1 | 1 | 1 | 1 |
| SuMM | N/A  | supramammillary nucleus, left, medial part       | 4670      | 4669  | L | 7FFF89 | 0 | 0 | 0 | 0 | 0 | 0 |
| SuM  | N/A  | supramammillary nucleus, right                   | 4683      | 12911 | R | 7FFF89 | 0 | 0 | 0 | 0 | 0 | 0 |
| SuMM | N/A  | supramammillary nucleus, right, medial part      | 4684      | 4683  | R | 7FFF89 | 0 | 0 | 0 | 0 | 0 | 0 |
| TM   | N/A  | tuberomammillary nucleus                         | 12912     | 4665  |   | 7FFF89 | 0 | 0 | 0 | 0 | 0 | 0 |
| TM   | TM   | tuberomammillary nucleus, left                   | 4667      | 12912 | L | 7FFF89 | 0 | 0 | 1 | 1 | 1 | 1 |
| TMp  | N/A  | tuberomammillary nucleus, left, principle part   | 4668      | 4667  | L | 7FFF89 | 0 | 0 | 0 | 0 | 0 | 0 |
| TM   | N/A  | tuberomammillary nucleus, right                  | 4681      | 12912 | R | 7FFF89 | 0 | 0 | 0 | 0 | 0 | 0 |
| TMp  | N/A  | tuberomammillary nucleus, right, principle part  | 4682      | 4681  | R | 7FFF89 | 0 | 0 | 0 | 0 | 0 | 0 |



|       |       |                                                                   |       |       |   |        |   |   |   |   |   |   |
|-------|-------|-------------------------------------------------------------------|-------|-------|---|--------|---|---|---|---|---|---|
| *PrOR | N/A   | preoptic region                                                   | 4541  | 4540  |   | 7FFF8F | 0 | 0 | 0 | 0 | 0 | 0 |
| *PrOR | *PrOR | preoptic region, left                                             | 4542  | 4541  | L | 7FFF8F | 1 | 1 | 1 | 1 | 1 | 1 |
| IMH   | N/A   | intermediate hypothalamic nuclei, left                            | 4553  | 4542  | L | 7FFF8F | 0 | 0 | 0 | 0 | 0 | 0 |
| IN    | N/A   | intermediate nucleus, left                                        | 4554  | 4553  | L | 7FFF8F | 0 | 0 | 0 | 0 | 0 | 0 |
| UN    | N/A   | uncinate nucleus, left                                            | 4555  | 4553  | L | 7FFF8F | 0 | 0 | 0 | 0 | 0 | 0 |
| LPO   | N/A   | lateral preoptic area, left                                       | 4552  | 4542  | L | 7FFF8F | 0 | 0 | 0 | 0 | 0 | 0 |
| MPA   | N/A   | medial preoptic area, left                                        | 4543  | 4542  | L | 7FFF8F | 0 | 0 | 0 | 0 | 0 | 0 |
| MPO   | N/A   | medial preoptic nucleus, left                                     | 4544  | 4543  | L | 7FFF8F | 0 | 0 | 0 | 0 | 0 | 0 |
| MPOC  | N/A   | medial preoptic nucleus, left, central part                       | 4547  | 4544  | L | 7FFF8F | 0 | 0 | 0 | 0 | 0 | 0 |
| MPOL  | N/A   | medial preoptic nucleus, left, lateral part                       | 4545  | 4544  | L | 7FFF8F | 0 | 0 | 0 | 0 | 0 | 0 |
| MPOM  | N/A   | medial preoptic nucleus, left, medial part                        | 4546  | 4544  | L | 7FFF8F | 0 | 0 | 0 | 0 | 0 | 0 |
| MnPO  | N/A   | median preoptic nucleus, left                                     | 4548  | 4543  | L | 7FFF8F | 0 | 0 | 0 | 0 | 0 | 0 |
| PVpo  | N/A   | periventricular nucleus of the hypothalamus, left, preoptic part  | 4549  | 4542  | L | 7FFF8F | 0 | 0 | 0 | 0 | 0 | 0 |
| AVPV  | N/A   | anteroventral periventricular nucleus, left                       | 4550  | 4549  | L | 7FFF8F | 0 | 0 | 0 | 0 | 0 | 0 |
| DPV   | N/A   | dorsal periventricular nucleus, left                              | 4551  | 4549  | L | 7FFF8F | 0 | 0 | 0 | 0 | 0 | 0 |
| *PrOR | *PrOR | preoptic region, right                                            | 4556  | 4541  | R | 7FFF8F | 1 | 1 | 0 | 0 | 0 | 0 |
| IMH   | N/A   | intermediate hypothalamic nuclei, right                           | 4567  | 4556  | R | 7FFF8F | 0 | 0 | 0 | 0 | 0 | 0 |
| IN    | N/A   | intermediate nucleus, right                                       | 4568  | 4567  | R | 7FFF8F | 0 | 0 | 0 | 0 | 0 | 0 |
| UN    | N/A   | uncinate nucleus, right                                           | 4569  | 4567  | R | 7FFF8F | 0 | 0 | 0 | 0 | 0 | 0 |
| LPO   | N/A   | lateral preoptic area, right                                      | 4566  | 4556  | R | 7FFF8F | 0 | 0 | 0 | 0 | 0 | 0 |
| MPA   | N/A   | medial preoptic area, right                                       | 4557  | 4556  | R | 7FFF8F | 0 | 0 | 0 | 0 | 0 | 0 |
| MPO   | N/A   | medial preoptic nucleus, right                                    | 4558  | 4557  | R | 7FFF8F | 0 | 0 | 0 | 0 | 0 | 0 |
| MPOC  | N/A   | medial preoptic nucleus, right, central part                      | 4561  | 4558  | R | 7FFF8F | 0 | 0 | 0 | 0 | 0 | 0 |
| MPOL  | N/A   | medial preoptic nucleus, right, lateral part                      | 4559  | 4558  | R | 7FFF8F | 0 | 0 | 0 | 0 | 0 | 0 |
| MPOM  | N/A   | medial preoptic nucleus, right, medial part                       | 4560  | 4558  | R | 7FFF8F | 0 | 0 | 0 | 0 | 0 | 0 |
| MnPO  | N/A   | median preoptic nucleus, right                                    | 4562  | 4557  | R | 7FFF8F | 0 | 0 | 0 | 0 | 0 | 0 |
| PVpo  | N/A   | periventricular nucleus of the hypothalamus, right, preoptic part | 4563  | 4556  | R | 7FFF8F | 0 | 0 | 0 | 0 | 0 | 0 |
| AVPV  | N/A   | anteroventral periventricular nucleus, right                      | 4564  | 4563  | R | 7FFF8F | 0 | 0 | 0 | 0 | 0 | 0 |
| DPV   | N/A   | dorsal periventricular nucleus, right                             | 4565  | 4563  | R | 7FFF8F | 0 | 0 | 0 | 0 | 0 | 0 |
| TubR  | N/A   | tuberal region                                                    | 4633  | 4540  |   | 7FFF97 | 0 | 0 | 0 | 0 | 0 | 0 |
| Pit   | N/A   | pituitary body                                                    | 4634  | 4633  |   | 7FFF97 | 0 | 0 | 0 | 0 | 0 | 0 |
| ARH   | N/A   | arcuate nucleus of the hypothalamus                               | 12913 | 4633  |   | 7FFF97 | 0 | 0 | 0 | 0 | 0 | 0 |
| ARH   | ARH   | arcuate nucleus of the hypothalamus, left                         | 4644  | 12913 | L | 7FFF97 | 0 | 1 | 0 | 0 | 1 | 1 |
| ArcD  | N/A   | arcuate nucleus of the hypothalamus, left, dorsal part            | 4645  | 4644  | L | 7FFF97 | 0 | 0 | 0 | 0 | 0 | 0 |
| ArcL  | N/A   | arcuate nucleus of the hypothalamus, left, lateral part           | 4646  | 4644  | L | 7FFF97 | 0 | 0 | 0 | 0 | 0 | 0 |

|      |     |                                                                  |       |       |   |        |   |   |   |   |   |   |
|------|-----|------------------------------------------------------------------|-------|-------|---|--------|---|---|---|---|---|---|
| ArcM | N/A | arcuate nucleus of the hypothalamus, left, medial part           | 4647  | 4644  | L | 7FFF97 | 0 | 0 | 0 | 0 | 0 | 0 |
| ARH  | ARH | arcuate nucleus of the hypothalamus, right                       | 4659  | 12913 | R | 7FFF97 | 0 | 1 | 0 | 0 | 0 | 0 |
| ArcD | N/A | arcuate nucleus of the hypothalamus, right, dorsal part          | 4660  | 4659  | R | 7FFF97 | 0 | 0 | 0 | 0 | 0 | 0 |
| ArcL | N/A | arcuate nucleus of the hypothalamus, right, lateral part         | 4661  | 4659  | R | 7FFF97 | 0 | 0 | 0 | 0 | 0 | 0 |
| ArcM | N/A | arcuate nucleus of the hypothalamus, right, medial part          | 4662  | 4659  | R | 7FFF97 | 0 | 0 | 0 | 0 | 0 | 0 |
| DMH  | N/A | dorsomedial hypothalamic nucleus                                 | 12914 | 4633  |   | 7FFF97 | 0 | 0 | 0 | 0 | 0 | 0 |
| DMH  | DMH | dorsomedial hypothalamic nucleus, left                           | 4641  | 12914 | L | 7FFF97 | 0 | 0 | 2 | 1 | 1 | 1 |
| DMH  | N/A | dorsomedial hypothalamic nucleus, left, compact part             | 4642  | 4641  | L | 7FFF97 | 0 | 0 | 0 | 0 | 0 | 0 |
| DMD  | N/A | dorsomedial hypothalamic nucleus, left, diffuse part             | 4643  | 4641  | L | 7FFF97 | 0 | 0 | 0 | 0 | 0 | 0 |
| DMH  | N/A | dorsomedial hypothalamic nucleus, right                          | 4656  | 12914 | R | 7FFF97 | 0 | 0 | 0 | 0 | 0 | 0 |
| DMH  | N/A | dorsomedial hypothalamic nucleus, right, compact part            | 4657  | 4656  | R | 7FFF97 | 0 | 0 | 0 | 0 | 0 | 0 |
| DMD  | N/A | dorsomedial hypothalamic nucleus, right, diffuse part            | 4658  | 4656  | R | 7FFF97 | 0 | 0 | 0 | 0 | 0 | 0 |
| LHT  | N/A | lateral hypothalamic area, tuberal region                        | 13007 | 4633  |   | 7FFF97 | 0 | 0 | 0 | 0 | 0 | 0 |
| LHT  | LHT | lateral hypothalamic area, tuberal region, left                  | 13008 | 13007 | L | 7FFF97 | 0 | 0 | 1 | 1 | 1 | 1 |
| LHT  | N/A | lateral hypothalamic area, tuberal region, right                 | 13009 | 13007 | R | 7FFF97 | 0 | 0 | 0 | 0 | 0 | 0 |
| LTu  | N/A | lateral tuberal nucleus                                          | 12915 | 4633  |   | 7FFF97 | 0 | 0 | 0 | 0 | 0 | 0 |
| LTu  | LTu | lateral tuberal nucleus, left                                    | 10151 | 12915 | L | 7FFF97 | 0 | 0 | 1 | 1 | 1 | 1 |
| LTu  | N/A | lateral tuberal nucleus, right                                   | 10152 | 12915 | R | 7FFF97 | 0 | 0 | 0 | 0 | 0 | 0 |
| ME   | N/A | median eminence                                                  | 12916 | 4633  |   | 7FFF97 | 0 | 0 | 0 | 0 | 0 | 0 |
| ME   | N/A | median eminence, left                                            | 4649  | 12916 | L | 7FFF97 | 0 | 0 | 0 | 0 | 0 | 0 |
| ME   | N/A | median eminence, right                                           | 4664  | 12916 | R | 7FFF97 | 0 | 0 | 0 | 0 | 0 | 0 |
| PeF  | N/A | perifornical nucleus                                             | 12917 | 4633  |   | 7FFF97 | 0 | 0 | 0 | 0 | 0 | 0 |
| PeF  | PeF | perifornical nucleus, left                                       | 4648  | 12917 | L | 7FFF97 | 0 | 0 | 1 | 1 | 1 | 2 |
| PeF  | N/A | perifornical nucleus, right                                      | 4663  | 12917 | R | 7FFF97 | 0 | 0 | 0 | 0 | 0 | 0 |
| PVt  | N/A | periventricular nucleus of the hypothalamus, tuberal part        | 12918 | 4633  |   | 7FFF97 | 0 | 0 | 0 | 0 | 0 | 0 |
| PVt  | N/A | periventricular nucleus of the hypothalamus, tuberal part, left  | 4636  | 12918 | L | 7FFF97 | 0 | 0 | 0 | 0 | 0 | 0 |
| PVt  | N/A | periventricular nucleus of the hypothalamus, tuberal part, right | 4651  | 12918 | R | 7FFF97 | 0 | 0 | 0 | 0 | 0 | 0 |

|      |      |                                                        |       |       |   |        |   |   |   |   |   |   |
|------|------|--------------------------------------------------------|-------|-------|---|--------|---|---|---|---|---|---|
| VMH  | N/A  | ventromedial hypothalamic nucleus                      | 12919 | 4633  |   | 7FFF97 | 0 | 0 | 0 | 0 | 0 | 0 |
| VMH  | VMH  | ventromedial hypothalamic nucleus, left                | 4637  | 12919 | L | 7FFF97 | 0 | 1 | 2 | 1 | 1 | 1 |
| VMHd | N/A  | ventromedial hypothalamic nucleus, left, dorsal part   | 4639  | 4637  | L | 7FFF97 | 0 | 0 | 0 | 0 | 0 | 0 |
| VMHc | N/A  | ventromedial hypothalamic nucleus, left, central part  | 4640  | 4637  | L | 7FFF97 | 0 | 0 | 0 | 0 | 0 | 0 |
| VMHv | N/A  | ventromedial hypothalamic nucleus, left, ventral part  | 4638  | 4637  | L | 7FFF97 | 0 | 0 | 0 | 0 | 0 | 0 |
| VMH  | VMH  | ventromedial hypothalamic nucleus, right               | 4652  | 12919 | R | 7FFF97 | 0 | 1 | 0 | 0 | 0 | 0 |
| VMHd | N/A  | ventromedial hypothalamic nucleus, right, dorsal part  | 4654  | 4652  | R | 7FFF97 | 0 | 0 | 0 | 0 | 0 | 0 |
| VMHc | N/A  | ventromedial hypothalamic nucleus, right, central part | 4655  | 4652  | R | 7FFF97 | 0 | 0 | 0 | 0 | 0 | 0 |
| VMHv | N/A  | ventromedial hypothalamic nucleus, right, ventral part | 4653  | 4652  | R | 7FFF97 | 0 | 0 | 0 | 0 | 0 | 0 |
| SbT  | N/A  | subthalamus                                            | 4517  | 4391  |   | 92FF5D | 0 | 0 | 0 | 0 | 0 | 0 |
| *Sb  | *Sb  | subthalamic nucleus, left                              | 4518  | 4517  | L | 92FF5D | 1 | 2 | 2 | 2 | 1 | 3 |
| *Sb  | *Sb  | subthalamic nucleus, right                             | 4519  | 4517  | R | 92FF5D | 2 | 1 | 0 | 0 | 0 | 0 |
| TH   | N/A  | thalamus                                               | 4392  | 4391  |   | C6F359 | 0 | 0 | 0 | 0 | 0 | 0 |
| DT   | N/A  | dorsal thalamus                                        | 4393  | 4392  |   | A9E855 | 0 | 0 | 0 | 0 | 0 | 0 |
| *DTA | N/A  | anterior group of nuclei                               | 12920 | 4393  |   | A9E855 | 0 | 0 | 0 | 0 | 0 | 0 |
| *DTA | *DTA | anterior group of nuclei, left                         | 4395  | 12920 | L | A9E855 | 4 | 4 | 3 | 3 | 2 | 3 |
| AD   | N/A  | anterodorsal nucleus of the thalamus, left             | 4398  | 4395  | L | A9E855 | 0 | 0 | 0 | 0 | 0 | 0 |
| AM   | N/A  | anteromedial nucleus of the thalamus, left             | 4396  | 4395  | L | A9E855 | 0 | 0 | 0 | 0 | 0 | 0 |
| AV   | N/A  | anteroventral nucleus of the thalamus, left            | 4397  | 4395  | L | A9E855 | 0 | 0 | 0 | 0 | 0 | 0 |
| LD   | N/A  | lateral dorsal nucleus of the thalamus, left           | 4399  | 4395  | L | A9E855 | 0 | 0 | 0 | 0 | 0 | 0 |
| *DTA | *DTA | anterior group of nuclei, right                        | 4450  | 12920 | R | A9E855 | 4 | 5 | 0 | 0 | 0 | 0 |
| AD   | N/A  | anterodorsal nucleus of the thalamus, right            | 4453  | 4450  | R | A9E855 | 0 | 0 | 0 | 0 | 0 | 0 |
| AM   | N/A  | anteromedial nucleus of the thalamus, right            | 4451  | 4450  | R | A9E855 | 0 | 0 | 0 | 0 | 0 | 0 |
| AV   | N/A  | anteroventral nucleus of the thalamus, right           | 4452  | 4450  | R | A9E855 | 0 | 0 | 0 | 0 | 0 | 0 |
| LD   | N/A  | lateral dorsal nucleus of the thalamus, right          | 4454  | 4450  | R | A9E855 | 0 | 0 | 0 | 0 | 0 | 0 |
| *ILc | N/A  | caudal group of intralaminar nuclei                    | 12921 | 4393  |   | A9E855 | 0 | 0 | 0 | 0 | 0 | 0 |
| *ILc | *ILc | caudal group of intralaminar nuclei, left              | 4437  | 12921 | L | A9E855 | 1 | 1 | 1 | 2 | 1 | 1 |
| CM   | N/A  | centre median nucleus of the thalamus, left            | 4438  | 4437  | L | A9E855 | 0 | 0 | 0 | 0 | 0 | 0 |
| pf   | N/A  | parafascicular nucleus of the thalamus, left           | 4439  | 4437  | L | A9E855 | 0 | 0 | 0 | 0 | 0 | 0 |
| *ILc | *ILc | caudal group of intralaminar nuclei, right             | 4492  | 12921 | R | A9E855 | 2 | 2 | 0 | 0 | 0 | 0 |
| CM   | N/A  | centre median nucleus of the thalamus, right           | 4493  | 4492  | R | A9E855 | 0 | 0 | 0 | 0 | 0 | 0 |
| pf   | N/A  | parafascicular nucleus of the thalamus, right          | 4494  | 4492  | R | A9E855 | 0 | 0 | 0 | 0 | 0 | 0 |

|       |       |                                                                     |       |       |   |        |   |   |   |   |   |   |
|-------|-------|---------------------------------------------------------------------|-------|-------|---|--------|---|---|---|---|---|---|
| *LGd  | N/A   | dorsal lateral geniculate nucleus                                   | 12922 | 4393  |   | A9E855 | 0 | 0 | 0 | 0 | 0 | 0 |
| *LGd  | *LGd  | dorsal lateral geniculate nucleus, left                             | 4440  | 12922 | L | A9E855 | 2 | 1 | 3 | 3 | 1 | 3 |
| LGdm  | N/A   | dorsal lateral geniculate nucleus, left, magnocellular layers       | 4441  | 4440  | L | A9E855 | 0 | 0 | 0 | 0 | 0 | 0 |
| LGdp  | N/A   | dorsal lateral geniculate nucleus, left, parvocellular layers       | 4442  | 4440  | L | A9E855 | 0 | 0 | 0 | 0 | 0 | 0 |
| LGds  | N/A   | dorsal lateral geniculate nucleus, left, s and intercalated layers  | 4443  | 4440  | L | A9E855 | 0 | 0 | 0 | 0 | 0 | 0 |
| *LGd  | *LGd  | dorsal lateral geniculate nucleus, right                            | 4495  | 12922 | R | A9E855 | 1 | 3 | 0 | 0 | 0 | 0 |
| LGdm  | N/A   | dorsal lateral geniculate nucleus, right, magnocellular layers      | 4496  | 4495  | R | A9E855 | 0 | 0 | 0 | 0 | 0 | 0 |
| LGdp  | N/A   | dorsal lateral geniculate nucleus, right, parvocellular layers      | 4497  | 4495  | R | A9E855 | 0 | 0 | 0 | 0 | 0 | 0 |
| LGds  | N/A   | dorsal lateral geniculate nucleus, right, s and intercalated layers | 4498  | 4495  | R | A9E855 | 0 | 0 | 0 | 0 | 0 | 0 |
| DTL   | N/A   | lateral group of nuclei                                             | 12923 | 4393  |   | A9E855 | 0 | 0 | 0 | 0 | 0 | 0 |
| *DTLd | N/A   | lateral group of nuclei, dorsal division                            | 12924 | 12923 |   | A9E855 | 0 | 0 | 0 | 0 | 0 | 0 |
| *DTLd | *DTLd | lateral group of nuclei, left, dorsal division                      | 4409  | 12924 | L | A9E855 | 1 | 1 | 3 | 4 | 2 | 2 |
| LP    | N/A   | lateral posterior nucleus of the thalamus, left                     | 4410  | 4409  | L | A9E855 | 0 | 0 | 0 | 0 | 0 | 0 |
| Pla   | N/A   | anterior nucleus of the pulvinar, left                              | 4411  | 4409  | L | A9E855 | 0 | 0 | 0 | 0 | 0 | 0 |
| Pli   | N/A   | inferior nucleus of the pulvinar, left                              | 4414  | 4409  | L | A9E855 | 0 | 0 | 0 | 0 | 0 | 0 |
| Plii  | N/A   | inferior nucleus of the pulvinar, left, lateral division            | 4415  | 4414  | L | A9E855 | 0 | 0 | 0 | 0 | 0 | 0 |
| Plim  | N/A   | inferior nucleus of the pulvinar, left, medial division             | 4416  | 4414  | L | A9E855 | 0 | 0 | 0 | 0 | 0 | 0 |
| Pli   | N/A   | lateral nucleus of the pulvinar, left                               | 4413  | 4409  | L | A9E855 | 0 | 0 | 0 | 0 | 0 | 0 |
| Plm   | N/A   | medial nucleus of the pulvinar, left                                | 4412  | 4409  | L | A9E855 | 0 | 0 | 0 | 0 | 0 | 0 |
| *DTLd | *DTLd | lateral group of nuclei, right, dorsal division                     | 4464  | 12924 | R | A9E855 | 2 | 2 | 0 | 0 | 0 | 0 |
| LP    | N/A   | lateral posterior nucleus of the thalamus, right                    | 4465  | 4464  | R | A9E855 | 0 | 0 | 0 | 0 | 0 | 0 |
| Pla   | N/A   | anterior nucleus of the pulvinar, right                             | 4466  | 4464  | R | A9E855 | 0 | 0 | 0 | 0 | 0 | 0 |
| Pli   | N/A   | inferior nucleus of the pulvinar, right                             | 4469  | 4464  | R | A9E855 | 0 | 0 | 0 | 0 | 0 | 0 |
| Plii  | N/A   | inferior nucleus of the pulvinar, right, lateral division           | 4470  | 4469  | R | A9E855 | 0 | 0 | 0 | 0 | 0 | 0 |
| Plim  | N/A   | inferior nucleus of the pulvinar, right, medial division            | 4471  | 4469  | R | A9E855 | 0 | 0 | 0 | 0 | 0 | 0 |
| Pli   | N/A   | lateral nucleus of the pulvinar, right                              | 4468  | 4464  | R | A9E855 | 0 | 0 | 0 | 0 | 0 | 0 |
| Plm   | N/A   | medial nucleus of the pulvinar, right                               | 4467  | 4464  | R | A9E855 | 0 | 0 | 0 | 0 | 0 | 0 |
| *DTLv | N/A   | lateral group of nuclei, ventral division                           | 12925 | 12923 |   | A9E855 | 0 | 0 | 0 | 0 | 0 | 0 |

|       |       |                                                                             |           |       |   |        |   |   |   |   |   |   |
|-------|-------|-----------------------------------------------------------------------------|-----------|-------|---|--------|---|---|---|---|---|---|
| *DTLv | *DTLv | lateral group of nuclei, left, ventral division                             | 4417      | 12925 | L | A9E855 | 5 | 4 | 3 | 2 | 3 | 3 |
| VMb   | N/A   | basal ventral medial nucleus of the thalamus, left                          | 4427      | 4417  | L | A9E855 | 0 | 0 | 0 | 0 | 0 | 0 |
| VA    | N/A   | ventral anterior nucleus of the thalamus, left                              | 4418      | 4417  | L | A9E855 | 0 | 0 | 0 | 0 | 0 | 0 |
| VAmc  | N/A   | ventral anterior nucleus of the thalamus, left, magnocellular division      | 4420      | 4418  | L | A9E855 | 0 | 0 | 0 | 0 | 0 | 0 |
| VAp   | N/A   | ventral anterior nucleus of the thalamus, left, principal division          | 4419      | 4418  | L | A9E855 | 0 | 0 | 0 | 0 | 0 | 0 |
| VLa   | N/A   | ventral lateral anterior nucleus of the thalamus, left                      | 4422      | 4417  | L | A9E855 | 0 | 0 | 0 | 0 | 0 | 0 |
| VLp   | N/A   | ventral lateral posterior nucleus of the thalamus, left                     | 4423      | 4417  | L | A9E855 | 0 | 0 | 0 | 0 | 0 | 0 |
| VM    | N/A   | ventral medial nucleus of the thalamus, left                                | 4421      | 4417  | L | A9E855 | 0 | 0 | 0 | 0 | 0 | 0 |
| VPI   | N/A   | ventral posterior inferior nucleus of the thalamus, left                    | 4426      | 4417  | L | A9E855 | 0 | 0 | 0 | 0 | 0 | 0 |
| VPL   | N/A   | ventral posterior lateral nucleus of the thalamus, left                     | 4425      | 4417  | L | A9E855 | 0 | 0 | 0 | 0 | 0 | 0 |
| VPLa  | N/A   | ventral posterior lateral nucleus of the thalamus, left, anterior division  | 265504812 | 4425  | L | A9E855 | 0 | 0 | 0 | 0 | 0 | 0 |
| VPLp  | N/A   | ventral posterior lateral nucleus of the thalamus, left, posterior division | 265504816 | 4425  | L | A9E855 | 0 | 0 | 0 | 0 | 0 | 0 |
| VPM   | N/A   | ventral posterior medial nucleus of the thalamus, left                      | 4424      | 4417  | L | A9E855 | 0 | 0 | 0 | 0 | 0 | 0 |
| *DTLv | *DTLv | lateral group of nuclei, right, ventral division                            | 4472      | 12925 | R | A9E855 | 7 | 5 | 0 | 0 | 0 | 0 |
| VMb   | N/A   | basal ventral medial nucleus of the thalamus, right                         | 4482      | 4472  | R | A9E855 | 0 | 0 | 0 | 0 | 0 | 0 |
| VA    | N/A   | ventral anterior nucleus of the thalamus, right                             | 4473      | 4472  | R | A9E855 | 0 | 0 | 0 | 0 | 0 | 0 |
| VAmc  | N/A   | ventral anterior nucleus of the thalamus, right, magnocellular division     | 4475      | 4473  | R | A9E855 | 0 | 0 | 0 | 0 | 0 | 0 |
| VAp   | N/A   | ventral anterior nucleus of the thalamus, right, principal division         | 4474      | 4473  | R | A9E855 | 0 | 0 | 0 | 0 | 0 | 0 |
| VLa   | N/A   | ventral lateral anterior nucleus of the thalamus, right                     | 4477      | 4472  | R | A9E855 | 0 | 0 | 0 | 0 | 0 | 0 |
| VLp   | N/A   | ventral lateral posterior nucleus of the thalamus, right                    | 4478      | 4472  | R | A9E855 | 0 | 0 | 0 | 0 | 0 | 0 |
| VM    | N/A   | ventral medial nucleus of the thalamus, right                               | 4476      | 4472  | R | A9E855 | 0 | 0 | 0 | 0 | 0 | 0 |

|      |      |                                                                              |           |           |   |        |   |   |   |   |   |   |
|------|------|------------------------------------------------------------------------------|-----------|-----------|---|--------|---|---|---|---|---|---|
| VPI  | N/A  | ventral posterior inferior nucleus of the thalamus, right                    | 4481      | 4472      | R | A9E855 | 0 | 0 | 0 | 0 | 0 | 0 |
| VPL  | N/A  | ventral posterior lateral nucleus of the thalamus, right                     | 4480      | 4472      | R | A9E855 | 0 | 0 | 0 | 0 | 0 | 0 |
| VPLa | N/A  | ventral posterior lateral nucleus of the thalamus, right, anterior division  | 265504820 | 4480      | R | A9E855 | 0 | 0 | 0 | 0 | 0 | 0 |
| VPLp | N/A  | ventral posterior lateral nucleus of the thalamus, right, posterior division | 265504824 | 4480      | R | A9E855 | 0 | 0 | 0 | 0 | 0 | 0 |
| VPM  | N/A  | ventral posterior medial nucleus of the thalamus, right                      | 4479      | 4472      | R | A9E855 | 0 | 0 | 0 | 0 | 0 | 0 |
| *MG  | N/A  | medial geniculate complex                                                    | 12926     | 4393      |   | A9E855 | 0 | 0 | 0 | 0 | 0 | 0 |
| *MG  | *MG  | medial geniculate complex, left                                              | 4444      | 12926     | L | A9E855 | 1 | 0 | 2 | 2 | 2 | 2 |
| MGd  | N/A  | dorsal nucelus of medial geniculate complex, left                            | 265504828 | 4444      | L | A9E855 | 0 | 0 | 0 | 0 | 0 | 0 |
| MGad | N/A  | anterodorsal nucleus of medial geniculate complex, left                      | 4446      | 265504828 | L | A9E855 | 0 | 0 | 0 | 0 | 0 | 0 |
| MGpd | N/A  | posterodorsal nucleus of medial geniculate complex, left                     | 4447      | 265504828 | L | A9E855 | 0 | 0 | 0 | 0 | 0 | 0 |
| MGmc | N/A  | magnocellular nucleus of the medial geniculate complex, left                 | 4448      | 4444      | L | A9E855 | 0 | 0 | 0 | 0 | 0 | 0 |
| MGv  | N/A  | ventral nucleus of the medial geniculate complex, left                       | 4445      | 4444      | L | A9E855 | 0 | 0 | 0 | 0 | 0 | 0 |
| *MG  | *MG  | medial geniculate complex, right                                             | 4499      | 12926     | R | A9E855 | 0 | 2 | 0 | 0 | 0 | 0 |
| MGd  | N/A  | dorsal nucelus of medial geniculate complex, right                           | 265504836 | 4499      | R | A9E855 | 0 | 0 | 0 | 0 | 0 | 0 |
| MGad | N/A  | anterodorsal nucleus of medial geniculate complex, right                     | 4501      | 265504836 | R | A9E855 | 0 | 0 | 0 | 0 | 0 | 0 |
| MGpd | N/A  | posterodorsal nucleus of medial geniculate complex, right                    | 4502      | 265504836 | R | A9E855 | 0 | 0 | 0 | 0 | 0 | 0 |
| MGmc | N/A  | magnocellular nucleus of the medial geniculate complex, right                | 4503      | 4499      | R | A9E855 | 0 | 0 | 0 | 0 | 0 | 0 |
| MGv  | N/A  | ventral nucleus of the medial geniculate complex, right                      | 4500      | 4499      | R | A9E855 | 0 | 0 | 0 | 0 | 0 | 0 |
| *DTM | N/A  | medial group of nuclei                                                       | 12927     | 4393      |   | A9E855 | 0 | 0 | 0 | 0 | 0 | 0 |
| *DTM | *DTM | medial group of nuclei, left                                                 | 4400      | 12927     | L | A9E855 | 4 | 5 | 2 | 3 | 2 | 2 |
| MD   | N/A  | mediodorsal nucleus of the thalamus, left                                    | 4401      | 4400      | L | A9E855 | 0 | 0 | 0 | 0 | 0 | 0 |
| MDp  | N/A  | mediodorsal nucleus of the thalamus, left, parvocellular division            | 4402      | 4401      | L | A9E855 | 0 | 0 | 0 | 0 | 0 | 0 |
| MDm  | N/A  | mediodorsal nucleus of the thalamus, left, magnocellular division            | 4403      | 4401      | L | A9E855 | 0 | 0 | 0 | 0 | 0 | 0 |

|      |      |                                                                      |           |       |   |        |   |   |   |   |   |   |
|------|------|----------------------------------------------------------------------|-----------|-------|---|--------|---|---|---|---|---|---|
| MDd  | N/A  | mediodorsal nucleus of the thalamus, left, densocellular division    | 4404      | 4401  | L | A9E855 | 0 | 0 | 0 | 0 | 0 | 0 |
| MDI  | N/A  | mediodorsal nucleus of thalamus, left, multiform (lateral) division  | 265504844 | 4401  | L | A9E855 | 0 | 0 | 0 | 0 | 0 | 0 |
| MV   | N/A  | medioventral nucleus of the thalamus, left                           | 4407      | 4400  | L | A9E855 | 0 | 0 | 0 | 0 | 0 | 0 |
| Pt   | N/A  | parataenial nucleus of the thalamus, left                            | 4405      | 4400  | L | A9E855 | 0 | 0 | 0 | 0 | 0 | 0 |
| Sm   | N/A  | submedial nucleus of the thalamus, left                              | 4406      | 4400  | L | A9E855 | 0 | 0 | 0 | 0 | 0 | 0 |
| *DTM | *DTM | medial group of nuclei, right                                        | 4455      | 12927 | R | A9E855 | 4 | 4 | 0 | 0 | 0 | 0 |
| MD   | N/A  | mediodorsal nucleus of the thalamus, right                           | 4456      | 4455  | R | A9E855 | 0 | 0 | 0 | 0 | 0 | 0 |
| MDp  | N/A  | mediodorsal nucleus of the thalamus, right, parvocellular division   | 4457      | 4456  | R | A9E855 | 0 | 0 | 0 | 0 | 0 | 0 |
| MDm  | N/A  | mediodorsal nucleus of the thalamus, right, magnocellular division   | 4458      | 4456  | R | A9E855 | 0 | 0 | 0 | 0 | 0 | 0 |
| MDd  | N/A  | mediodorsal nucleus of the thalamus, right, densocellular division   | 4459      | 4456  | R | A9E855 | 0 | 0 | 0 | 0 | 0 | 0 |
| MDI  | N/A  | mediodorsal nucleus of thalamus, right, multiform (lateral) division | 265504848 | 4456  |   | A9E855 | 0 | 0 | 0 | 0 | 0 | 0 |
| MV   | N/A  | medioventral nucleus of the thalamus, right                          | 4462      | 4455  | R | A9E855 | 0 | 0 | 0 | 0 | 0 | 0 |
| Pt   | N/A  | parataenial nucleus of the thalamus, right                           | 4460      | 4455  | R | A9E855 | 0 | 0 | 0 | 0 | 0 | 0 |
| Sm   | N/A  | submedial nucleus of the thalamus, right                             | 4461      | 4455  | R | A9E855 | 0 | 0 | 0 | 0 | 0 | 0 |
| DTP  | N/A  | posterior group of nuclei                                            | 12928     | 4393  |   | A9E855 | 0 | 0 | 0 | 0 | 0 | 0 |
| DTP  | *DTP | posterior group of nuclei, left                                      | 4428      | 12928 | L | A9E855 | 1 | 0 | 2 | 1 | 1 | 1 |
| L    | N/A  | limitans nucleus of the thalamus, left                               | 4429      | 4428  | L | A9E855 | 0 | 0 | 0 | 0 | 0 | 0 |
| Po   | N/A  | posterior nucleus of the thalamus, left                              | 4431      | 4428  | L | A9E855 | 0 | 0 | 0 | 0 | 0 | 0 |
| SG   | N/A  | suprageniculate nucleus of the thalamus, left                        | 4430      | 4428  | L | A9E855 | 0 | 0 | 0 | 0 | 0 | 0 |
| DTP  | *DTP | posterior group of nuclei, right                                     | 4483      | 12928 | R | A9E855 | 1 | 2 | 0 | 0 | 0 | 0 |
| L    | N/A  | limitans nucleus of the thalamus, right                              | 4484      | 4483  | R | A9E855 | 0 | 0 | 0 | 0 | 0 | 0 |
| Po   | N/A  | posterior nucleus of the thalamus, right                             | 4486      | 4483  | R | A9E855 | 0 | 0 | 0 | 0 | 0 | 0 |
| SG   | N/A  | suprageniculate nucleus of the thalamus, right                       | 4485      | 4483  | R | A9E855 | 0 | 0 | 0 | 0 | 0 | 0 |
| *ILr | N/A  | rostral group of intralaminar nuclei                                 | 12929     | 4393  |   | A9E855 | 0 | 0 | 0 | 0 | 0 | 0 |
| *ILr | *ILr | rostral group of intralaminar nuclei, left                           | 4432      | 12929 | L | A9E855 | 3 | 3 | 2 | 3 | 2 | 2 |
| CL   | N/A  | central lateral nucleus of the thalamus, left                        | 4434      | 4432  | L | A9E855 | 0 | 0 | 0 | 0 | 0 | 0 |
| CeM  | N/A  | central medial nucleus of the thalamus, left                         | 4436      | 4432  | L | A9E855 | 0 | 0 | 0 | 0 | 0 | 0 |
| Pc   | N/A  | paracentral nucleus of the thalamus, left                            | 4435      | 4432  | L | A9E855 | 0 | 0 | 0 | 0 | 0 | 0 |
| Rh   | N/A  | rhomboid nucleus of the thalamus, left                               | 4433      | 4432  | L | A9E855 | 0 | 0 | 0 | 0 | 0 | 0 |
| *ILr | *ILr | rostral group of intralaminar nuclei, right                          | 4487      | 12929 | R | A9E855 | 4 | 3 | 0 | 0 | 0 | 0 |
| CL   | N/A  | central lateral nucleus of the thalamus, right                       | 4489      | 4487  | R | A9E855 | 0 | 0 | 0 | 0 | 0 | 0 |

|      |     |                                                           |      |      |   |        |   |   |   |   |   |   |
|------|-----|-----------------------------------------------------------|------|------|---|--------|---|---|---|---|---|---|
| CeM  | N/A | central medial nucleus of the thalamus, right             | 4491 | 4487 | R | A9E855 | 0 | 0 | 0 | 0 | 0 | 0 |
| Pc   | N/A | paracentral nucleus of the thalamus, right                | 4490 | 4487 | R | A9E855 | 0 | 0 | 0 | 0 | 0 | 0 |
| Rh   | N/A | rhomboid nucleus of the thalamus, right                   | 4488 | 4487 | R | A9E855 | 0 | 0 | 0 | 0 | 0 | 0 |
| VT   | N/A | ventral thalamus                                          | 4504 | 4392 |   | E2FF5D | 0 | 0 | 0 | 0 | 0 | 0 |
| VT   | N/A | ventral thalamus, left                                    | 4505 | 4504 | L | E2FF5D | 0 | 0 | 0 | 0 | 0 | 0 |
| FF   | N/A | nucleus of the H field of Forel, left                     | 4508 | 4505 | L | E2FF5D | 0 | 0 | 0 | 0 | 0 | 0 |
| *R   | *R  | reticular nucleus of thalamus, left                       | 4506 | 4505 | L | E2FF5D | 2 | 3 | 3 | 3 | 3 | 1 |
| *ZI  | *ZI | zona incerta, left                                        | 4507 | 4505 | L | E2FF5D | 1 | 2 | 2 | 2 | 2 | 1 |
| VT   | N/A | ventral thalamus, right                                   | 4511 | 4504 | R | E2FF5D | 0 | 0 | 0 | 0 | 0 | 0 |
| FF   | N/A | nucleus of the H field of Forel, right                    | 4514 | 4511 | R | E2FF5D | 0 | 0 | 0 | 0 | 0 | 0 |
| *R   | *R  | reticular nucleus of thalamus, right                      | 4512 | 4511 | R | E2FF5D | 3 | 4 | 0 | 0 | 0 | 0 |
| *ZI  | *ZI | zona incerta, right                                       | 4513 | 4511 | R | E2FF5D | 1 | 1 | 0 | 0 | 0 | 0 |
| MES  | N/A | mesencephalon                                             | 9001 | 4006 |   | 0E7911 | 0 | 0 | 0 | 0 | 0 | 0 |
| Tec  | N/A | midbrain tectum                                           | 9101 | 9001 |   | 98653  | 0 | 0 | 0 | 0 | 0 | 0 |
| IC   | N/A | inferior colliculus                                       | 9102 | 9101 |   | 98653  | 0 | 0 | 0 | 0 | 0 | 0 |
| IC   | IC  | inferior colliculus, left                                 | 9103 | 9102 | L | 98653  | 0 | 2 | 1 | 0 | 2 | 2 |
| CIC  | N/A | central nucleus of the inferior colliculus, left          | 9104 | 9103 | L | 98653  | 0 | 0 | 0 | 0 | 0 | 0 |
| EIC  | N/A | external nucleus of the inferior colliculus, left         | 9105 | 9103 | L | 98653  | 0 | 0 | 0 | 0 | 0 | 0 |
| PCIC | N/A | pericentral nucleus of the inferior colliculus, left      | 9106 | 9103 | L | 98653  | 0 | 0 | 0 | 0 | 0 | 0 |
| IC   | N/A | inferior colliculus, right                                | 9107 | 9102 | R | 98653  | 0 | 0 | 0 | 0 | 0 | 0 |
| CIC  | N/A | central nucleus of the inferior colliculus, right         | 9108 | 9107 | R | 98653  | 0 | 0 | 0 | 0 | 0 | 0 |
| EIC  | N/A | external nucleus of the inferior colliculus, right        | 9109 | 9107 | R | 98653  | 0 | 0 | 0 | 0 | 0 | 0 |
| PCIC | N/A | pericentral nucleus of the inferior colliculus, right     | 9110 | 9107 | R | 98653  | 0 | 0 | 0 | 0 | 0 | 0 |
| ICN  | N/A | intercollicular nucleus                                   | 9480 | 9101 |   | 98653  | 0 | 0 | 0 | 0 | 0 | 0 |
| ICN  | N/A | intercollicular nucleus, left                             | 9481 | 9480 | L | 98653  | 0 | 0 | 0 | 0 | 0 | 0 |
| ICN  | N/A | intercollicular nucleus, right                            | 9482 | 9480 | R | 98653  | 0 | 0 | 0 | 0 | 0 | 0 |
| BrC  | N/A | nucleus of the brachium of the inferior colliculus        | 9483 | 9101 |   | 98653  | 0 | 0 | 0 | 0 | 0 | 0 |
| BrC  | N/A | nucleus of the brachium of the inferior colliculus, left  | 9484 | 9483 | L | 98653  | 0 | 0 | 0 | 0 | 0 | 0 |
| BrC  | N/A | nucleus of the brachium of the inferior colliculus, right | 9485 | 9483 | R | 98653  | 0 | 0 | 0 | 0 | 0 | 0 |
| PBG  | N/A | parabigeminal nucleus                                     | 9111 | 9101 |   | 98653  | 0 | 0 | 0 | 0 | 0 | 0 |
| PBG  | N/A | parabigeminal nucleus, left                               | 9112 | 9111 | L | 98653  | 0 | 0 | 0 | 0 | 0 | 0 |



|      |     |                                                           |      |      |   |        |   |   |   |   |   |   |
|------|-----|-----------------------------------------------------------|------|------|---|--------|---|---|---|---|---|---|
| PBG  | N/A | parabigeminal nucleus, right                              | 9113 | 9111 | R | 98653  | 0 | 0 | 0 | 0 | 0 | 0 |
| SC   | N/A | superior colliculus                                       | 9114 | 9101 |   | 98653  | 0 | 0 | 0 | 0 | 0 | 0 |
| SC   | SC  | superior colliculus, left                                 | 9115 | 9114 | L | 98653  | 1 | 1 | 0 | 0 | 2 | 2 |
| StL  | N/A | stratum lemnisci of the superior colliculus, left         | 9116 | 9115 | L | 98653  | 0 | 0 | 0 | 0 | 0 | 0 |
| DpG  | N/A | deep gray layer of the superior colliculus, left          | 9117 | 9116 | L | 98653  | 0 | 0 | 0 | 0 | 0 | 0 |
| DpWh | N/A | deep white layer of the superior colliculus, left         | 9118 | 9116 | L | 98653  | 0 | 0 | 0 | 0 | 0 | 0 |
| MGr  | N/A | middle gray layer of the superior colliculus, left        | 9119 | 9116 | L | 98653  | 0 | 0 | 0 | 0 | 0 | 0 |
| MWh  | N/A | middle white layer of the superior colliculus, left       | 9120 | 9116 | L | 98653  | 0 | 0 | 0 | 0 | 0 | 0 |
| SuG  | N/A | superficial gray layer of the superior colliculus, left   | 9121 | 9115 | L | 98653  | 0 | 0 | 0 | 0 | 0 | 0 |
| SuWh | N/A | superficial white layer of the superior colliculus, left  | 9122 | 9115 | L | 98653  | 0 | 0 | 0 | 0 | 0 | 0 |
| SC   | SC  | superior colliculus, right                                | 9123 | 9114 | R | 98653  | 0 | 1 | 0 | 0 | 0 | 0 |
| StL  | N/A | stratum lemnisci of the superior colliculus, right        | 9124 | 9123 | R | 98653  | 0 | 0 | 0 | 0 | 0 | 0 |
| DpG  | N/A | deep gray layer of the superior colliculus, right         | 9125 | 9124 | R | 98653  | 0 | 0 | 0 | 0 | 0 | 0 |
| DpWh | N/A | deep white layer of the superior colliculus, right        | 9126 | 9124 | R | 98653  | 0 | 0 | 0 | 0 | 0 | 0 |
| MGr  | N/A | middle gray layer of the superior colliculus, right       | 9127 | 9124 | R | 98653  | 0 | 0 | 0 | 0 | 0 | 0 |
| MWh  | N/A | middle white layer of the superior colliculus, right      | 9128 | 9124 | R | 98653  | 0 | 0 | 0 | 0 | 0 | 0 |
| SuG  | N/A | superficial gray layer of the superior colliculus, right  | 9129 | 9123 | R | 98653  | 0 | 0 | 0 | 0 | 0 | 0 |
| SuWh | N/A | superficial white layer of the superior colliculus, right | 9130 | 9123 | R | 98653  | 0 | 0 | 0 | 0 | 0 | 0 |
| Sag  | N/A | sagulum nucleus                                           | 9486 | 9101 |   | 98653  | 0 | 0 | 0 | 0 | 0 | 0 |
| Sag  | N/A | sagulum nucleus, left                                     | 9487 | 9486 | L | 98653  | 0 | 0 | 0 | 0 | 0 | 0 |
| Sag  | N/A | sagulum, nucleus, right                                   | 9488 | 9486 | R | 98653  | 0 | 0 | 0 | 0 | 0 | 0 |
| SCO  | N/A | subcommissural organ                                      | 9489 | 9101 |   | 98653  | 0 | 0 | 0 | 0 | 0 | 0 |
| SCO  | N/A | subcommissural organ, left                                | 9490 | 9489 | L | 98653  | 0 | 0 | 0 | 0 | 0 | 0 |
| SCO  | N/A | subcommissural organ, right                               | 9491 | 9489 | R | 98653  | 0 | 0 | 0 | 0 | 0 | 0 |
| MTg  | N/A | midbrain tegmentum                                        | 9002 | 9001 |   | 349009 | 0 | 0 | 0 | 0 | 0 | 0 |
| CGMB | N/A | central gray substance of midbrain                        | 9003 | 9002 |   | 349009 | 0 | 0 | 0 | 0 | 0 | 0 |

|        |      |                                                                   |           |           |   |        |   |   |   |   |   |   |
|--------|------|-------------------------------------------------------------------|-----------|-----------|---|--------|---|---|---|---|---|---|
| CGMB   | CGMB | central gray substance of midbrain, left                          | 9004      | 9003      | L | 349009 | 6 | 4 | 0 | 2 | 3 | 3 |
| CGMBdl | N/A  | central gray substance of midbrain, left, dorsolateral division   | 9440      | 9004      | L | 349009 | 0 | 0 | 0 | 0 | 0 | 0 |
| CGMBdm | N/A  | central gray substance of midbrain, left, dorsomedial division    | 9439      | 9004      | L | 349009 | 0 | 0 | 0 | 0 | 0 | 0 |
| CGMBl  | N/A  | central gray substance of midbrain, left, lateral division        | 9441      | 9004      | L | 349009 | 0 | 0 | 0 | 0 | 0 | 0 |
| CGMBpl | N/A  | central gray substance of midbrain, left, pleioglial division     | 9443      | 9004      | L | 349009 | 0 | 0 | 0 | 0 | 0 | 0 |
| CGMBvl | N/A  | central gray substance of midbrain, left, ventrolateral division  | 9442      | 9004      | L | 349009 | 0 | 0 | 0 | 0 | 0 | 0 |
| CGMB   | CGMB | central gray substance of midbrain, right                         | 9005      | 9003      | R | 349009 | 5 | 3 | 0 | 0 | 0 | 0 |
| CGMBdl | N/A  | central gray substance of midbrain, right, dorsolateral division  | 9445      | 9005      | R | 349009 | 0 | 0 | 0 | 0 | 0 | 0 |
| CGMBdm | N/A  | central gray substance of midbrain, right, dorsomedial division   | 9444      | 9005      | R | 349009 | 0 | 0 | 0 | 0 | 0 | 0 |
| CGMBl  | N/A  | central gray substance of midbrain, right, lateral division       | 9446      | 9005      | R | 349009 | 0 | 0 | 0 | 0 | 0 | 0 |
| CGMBpl | N/A  | central gray substance of midbrain, right, pleioglial division    | 9448      | 9005      | R | 349009 | 0 | 0 | 0 | 0 | 0 | 0 |
| CGMBvl | N/A  | central gray substance of midbrain, right, ventrolateral division | 9447      | 9005      | R | 349009 | 0 | 0 | 0 | 0 | 0 | 0 |
| EW     | N/A  | Edinger-Westphal nucleus                                          | 9449      | 9002      |   | 349009 | 0 | 0 | 0 | 0 | 0 | 0 |
| EW     | EW   | Edinger-Westphal nucleus, left                                    | 9450      | 9449      | L | 349009 | 0 | 1 | 0 | 1 | 0 | 0 |
| EW     | EW   | Edinger-Westphal nucleus, right                                   | 9451      | 9449      | R | 349009 | 0 | 1 | 0 | 0 | 0 | 0 |
| IP     | N/A  | interpeduncular nucleus                                           | 9012      | 9002      |   | 349009 | 0 | 0 | 0 | 0 | 0 | 0 |
| IP     | N/A  | interpeduncular nucleus, left                                     | 9013      | 9012      | L | 349009 | 0 | 0 | 0 | 0 | 0 | 0 |
| IP     | N/A  | interpeduncular nucleus, right                                    | 9014      | 9012      | R | 349009 | 0 | 0 | 0 | 0 | 0 | 0 |
| ICjl   | N/A  | interstitial nucleus of Cajal                                     | 9015      | 9002      |   | 349009 | 0 | 0 | 0 | 0 | 0 | 0 |
| ICjl   | ICjl | interstitial nucleus of Cajal, left                               | 9016      | 9015      | L | 349009 | 0 | 1 | 0 | 1 | 0 | 0 |
| ICjl   | ICjl | interstitial nucleus of Cajal, right                              | 9017      | 9015      | R | 349009 | 0 | 1 | 0 | 0 | 0 | 0 |
| isRt   | N/A  | isthmic reticular formation                                       | 265504852 | 9002      |   | 349009 | 0 | 0 | 0 | 0 | 0 | 0 |
| isRt   | N/A  | isthmic reticular formation, left                                 | 265504856 | 265504852 | L | 349009 | 0 | 0 | 0 | 0 | 0 | 0 |
| isRt   | N/A  | isthmic reticular formation, right                                | 265504860 | 265504852 | R | 349009 | 0 | 0 | 0 | 0 | 0 | 0 |
| MBRa   | MBRa | midbrain raphe nuclei                                             | 9455      | 9002      |   | 349009 | 3 | 4 | 0 | 0 | 0 | 0 |
| MBRa   | MBRa | midbrain raphe nuclei, left                                       | 9456      | 9455      | L | 349009 | 0 | 0 | 0 | 1 | 2 | 2 |
| DR     | N/A  | dorsal raphe nucleus, left                                        | 9457      | 9456      | L | 349009 | 0 | 0 | 0 | 0 | 0 | 0 |
| DRD    | N/A  | dorsal raphe nucleus, left, dorsal part                           | 9458      | 9457      | L | 349009 | 0 | 0 | 0 | 0 | 0 | 0 |
| DRI    | N/A  | dorsal raphe nucleus, left, interfascicular part                  | 9459      | 9457      | L | 349009 | 0 | 0 | 0 | 0 | 0 | 0 |

|       |       |                                                   |      |      |   |        |   |   |   |   |   |   |
|-------|-------|---------------------------------------------------|------|------|---|--------|---|---|---|---|---|---|
| DRrc  | N/A   | dorsal raphe nucleus, left, raphe cap             | 9461 | 9457 | L | 349009 | 0 | 0 | 0 | 0 | 0 | 0 |
| DRV   | N/A   | dorsal raphe nucleus, left, ventral part          | 9460 | 9457 | L | 349009 | 0 | 0 | 0 | 0 | 0 | 0 |
| MnR   | N/A   | median raphe, left                                | 9462 | 9456 | L | 349009 | 0 | 0 | 0 | 0 | 0 | 0 |
| MBRa  | N/A   | midbrain raphe nuclei, right                      | 9463 | 9455 | R | 349009 | 0 | 0 | 0 | 0 | 0 | 0 |
| DR    | N/A   | dorsal raphe nucleus, right                       | 9464 | 9463 | R | 349009 | 0 | 0 | 0 | 0 | 0 | 0 |
| DRD   | N/A   | dorsal raphe nucleus, right, dorsal part          | 9465 | 9464 | R | 349009 | 0 | 0 | 0 | 0 | 0 | 0 |
| DRI   | N/A   | dorsal raphe nucleus, right, interfascicular part | 9466 | 9464 | R | 349009 | 0 | 0 | 0 | 0 | 0 | 0 |
| DRrc  | N/A   | dorsal raphe nucleus, left, raphe cap             | 9468 | 9464 | R | 349009 | 0 | 0 | 0 | 0 | 0 | 0 |
| DRV   | N/A   | dorsal raphe nucleus, right, ventral part         | 9467 | 9464 | R | 349009 | 0 | 0 | 0 | 0 | 0 | 0 |
| MnR   | N/A   | median raphe, right                               | 9469 | 9463 | R | 349009 | 0 | 0 | 0 | 0 | 0 | 0 |
| MBRF  | N/A   | midbrain reticular formation                      | 9018 | 9002 |   | 349009 | 0 | 0 | 0 | 0 | 0 | 0 |
| MBRF  | N/A   | midbrain reticular formation, left                | 9019 | 9018 | L | 349009 | 0 | 0 | 0 | 0 | 0 | 0 |
| CnF   | CnF   | cuneiform nucleus, left                           | 9020 | 9019 | L | 349009 | 0 | 2 | 0 | 2 | 2 | 1 |
| PPTg  | N/A   | pedunclopontine tegmental nucleus, left           | 9021 | 9019 | L | 349009 | 0 | 0 | 0 | 0 | 0 | 0 |
| SubCn | SubCn | subcuneiform nucleus, left                        | 9022 | 9019 | L | 349009 | 1 | 2 | 1 | 1 | 1 | 0 |
| MBRF  | N/A   | midbrain reticular formation, right               | 9023 | 9018 | R | 349009 | 0 | 0 | 0 | 0 | 0 | 0 |
| CnF   | CnF   | cuneiform nucleus, right                          | 9024 | 9023 | R | 349009 | 0 | 2 | 0 | 0 | 0 | 0 |
| PPTg  | N/A   | pedunclopontine tegmental nucleus, right          | 9025 | 9023 | R | 349009 | 0 | 0 | 0 | 0 | 0 | 0 |
| SubCn | SubCn | subcuneiform nucleus, right                       | 9026 | 9023 | R | 349009 | 1 | 2 | 0 | 0 | 0 | 0 |
| Dk    | N/A   | nucleus of Darkschewitsch                         | 9047 | 9002 |   | 349009 | 0 | 0 | 0 | 0 | 0 | 0 |
| Dk    | Dk    | nucleus of Darkschewitsch, left                   | 9048 | 9047 | L | 349009 | 0 | 1 | 0 | 1 | 0 | 0 |
| Dk    | N/A   | nucleus of Darkschewitsch, right                  | 9049 | 9047 | R | 349009 | 0 | 0 | 0 | 0 | 0 | 0 |
| PCom  | N/A   | nucleus of the posterior commissure               | 9027 | 9002 |   | 349009 | 0 | 0 | 0 | 0 | 0 | 0 |
| PCom  | N/A   | nucleus of the posterior commissure, left         | 9028 | 9027 | L | 349009 | 0 | 0 | 0 | 0 | 0 | 0 |
| PCom  | N/A   | nucleus of the posterior commissure, right        | 9029 | 9027 | R | 349009 | 0 | 0 | 0 | 0 | 0 | 0 |
| 3     | N/A   | oculomotor nuclear complex                        | 9030 | 9002 |   | 349009 | 0 | 0 | 0 | 0 | 0 | 0 |
| 3     | 3     | oculomotor nuclear complex, left                  | 9031 | 9030 | L | 349009 | 1 | 0 | 0 | 1 | 0 | 1 |
| AM3   | N/A   | anterior median oculomotor nucleus, left          | 9032 | 9031 | L | 349009 | 0 | 0 | 0 | 0 | 0 | 0 |
| CC3   | N/A   | caudal central oculomotor nucleus, left           | 9033 | 9031 | L | 349009 | 0 | 0 | 0 | 0 | 0 | 0 |
| C3    | N/A   | central oculomotor nucleus, left                  | 9034 | 9031 | L | 349009 | 0 | 0 | 0 | 0 | 0 | 0 |
| D3    | N/A   | dorsal oculomotor nucleus, left                   | 9035 | 9031 | L | 349009 | 0 | 0 | 0 | 0 | 0 | 0 |
| I3    | N/A   | intermediate oculomotor nucleus, left             | 9036 | 9031 | L | 349009 | 0 | 0 | 0 | 0 | 0 | 0 |
| M3    | N/A   | medial oculomotor nucleus, left                   | 9037 | 9031 | L | 349009 | 0 | 0 | 0 | 0 | 0 | 0 |
| V3    | N/A   | ventral oculomotor nucleus, left                  | 9038 | 9031 | L | 349009 | 0 | 0 | 0 | 0 | 0 | 0 |
| 3     | 3     | oculomotor nuclear complex, right                 | 9039 | 9030 | R | 349009 | 1 | 2 | 0 | 0 | 0 | 0 |
| AM3   | N/A   | anterior median oculomotor nucleus, right         | 9040 | 9039 | R | 349009 | 0 | 0 | 0 | 0 | 0 | 0 |
| CC3   | N/A   | caudal central oculomotor nucleus, right          | 9041 | 9039 | R | 349009 | 0 | 0 | 0 | 0 | 0 | 0 |
| C3    | N/A   | central oculomotor nucleus, right                 | 9042 | 9039 | R | 349009 | 0 | 0 | 0 | 0 | 0 | 0 |
| D3    | N/A   | dorsal oculomotor nucleus, right                  | 9043 | 9039 | R | 349009 | 0 | 0 | 0 | 0 | 0 | 0 |

|      |      |                                                                           |      |      |   |        |   |   |   |   |   |   |
|------|------|---------------------------------------------------------------------------|------|------|---|--------|---|---|---|---|---|---|
| I3   | N/A  | intermediate oculomotor nucleus, right                                    | 9044 | 9039 | R | 349009 | 0 | 0 | 0 | 0 | 0 | 0 |
| M3   | N/A  | medial oculomotor nucleus, right                                          | 9045 | 9039 | R | 349009 | 0 | 0 | 0 | 0 | 0 | 0 |
| V3   | N/A  | ventral oculomotor nucleus, right                                         | 9046 | 9039 | R | 349009 | 0 | 0 | 0 | 0 | 0 | 0 |
| PPd  | N/A  | peripeduncular nucleus                                                    | 9050 | 9002 |   | 349009 | 0 | 0 | 0 | 0 | 0 | 0 |
| PPd  | N/A  | peripeduncular nucleus, left                                              | 9051 | 9050 | L | 349009 | 0 | 0 | 0 | 0 | 0 | 0 |
| PPd  | N/A  | peripeduncular nucleus, right                                             | 9052 | 9050 | R | 349009 | 0 | 0 | 0 | 0 | 0 | 0 |
| *RN  | N/A  | red nucleus                                                               | 9053 | 9002 |   | 349009 | 0 | 0 | 0 | 0 | 0 | 0 |
| *RN  | *RN  | red nucleus, left                                                         | 9054 | 9053 | L | 349009 | 3 | 3 | 1 | 1 | 2 | 1 |
| RMC  | N/A  | magnocellular part of the red nucleus, left                               | 9055 | 9054 | L | 349009 | 0 | 0 | 0 | 0 | 0 | 0 |
| RPC  | N/A  | parvocellular part of the red nucleus, left                               | 9056 | 9054 | L | 349009 | 0 | 0 | 0 | 0 | 0 | 0 |
| *RN  | *RN  | red nucleus, right                                                        | 9057 | 9053 | R | 349009 | 2 | 3 | 0 | 0 | 0 | 0 |
| RMC  | N/A  | magnocellular part of the red nucleus, right                              | 9058 | 9057 | R | 349009 | 0 | 0 | 0 | 0 | 0 | 0 |
| RPC  | N/A  | parvocellular part of the red nucleus, right                              | 9059 | 9057 | R | 349009 | 0 | 0 | 0 | 0 | 0 | 0 |
| RI   | N/A  | rostral interstitial nucleus of the medial longitudinal fasciculus        | 9060 | 9002 |   | 349009 | 0 | 0 | 0 | 0 | 0 | 0 |
| RI   | N/A  | rostral interstitial nucleus of the medial longitudinal fasciculus, left  | 9061 | 9060 | L | 349009 | 0 | 0 | 0 | 0 | 0 | 0 |
| RI   | N/A  | rostral interstitial nucleus of the medial longitudinal fasciculus, right | 9062 | 9060 | R | 349009 | 0 | 0 | 0 | 0 | 0 | 0 |
| SN   | N/A  | substantia nigra                                                          | 9072 | 9002 |   | 349009 | 0 | 0 | 0 | 0 | 0 | 0 |
| SN   | N/A  | substantia nigra, left                                                    | 9073 | 9072 | L | 349009 | 0 | 0 | 0 | 0 | 0 | 0 |
| *SNC | *SNC | substantia nigra, pars compacta, left                                     | 9074 | 9073 | L | 349009 | 4 | 4 | 3 | 3 | 4 | 3 |
| *SNR | *SNR | substantia nigra, pars reticulata, left                                   | 9075 | 9073 | L | 349009 | 2 | 3 | 1 | 4 | 4 | 2 |
| SN   | N/A  | substantia nigra, right                                                   | 9076 | 9072 | R | 349009 | 0 | 0 | 0 | 0 | 0 | 0 |
| *SNC | *SNC | substantia nigra, pars compacta, right                                    | 9077 | 9076 | R | 349009 | 3 | 4 | 0 | 0 | 0 | 0 |
| *SNR | *SNR | substantia nigra, pars reticulata, right                                  | 9078 | 9076 | R | 349009 | 2 | 6 | 0 | 0 | 0 | 0 |
| 4    | N/A  | trochlear nucleus                                                         | 9063 | 9002 |   | 349009 | 0 | 0 | 0 | 0 | 0 | 0 |
| 4    | 4    | trochlear nucleus, left                                                   | 9064 | 9063 | L | 349009 | 1 | 2 | 0 | 0 | 0 | 0 |
| 4    | 4    | trochlear nucleus, right                                                  | 9065 | 9063 | R | 349009 | 1 | 2 | 0 | 0 | 0 | 0 |
| *VTA | N/A  | ventral tegmental area                                                    | 9066 | 9002 |   | 349009 | 0 | 0 | 0 | 0 | 0 | 0 |
| *VTA | *VTA | ventral tegmental area, left                                              | 9067 | 9066 | L | 349009 | 3 | 2 | 2 | 3 | 2 | 1 |
| CLN  | N/A  | caudal linear nucleus, left                                               | 9470 | 9067 | L | 349009 | 0 | 0 | 0 | 0 | 0 | 0 |
| IF   | N/A  | interfascicular nucleus, left                                             | 9472 | 9067 | L | 349009 | 0 | 0 | 0 | 0 | 0 | 0 |
| PBP  | N/A  | parabrachial pigmented nucleus, left                                      | 9473 | 9067 | L | 349009 | 0 | 0 | 0 | 0 | 0 | 0 |
| PN   | N/A  | paranigral nucleus, left                                                  | 9474 | 9067 | L | 349009 | 0 | 0 | 0 | 0 | 0 | 0 |
| RL   | N/A  | rostral linear nucleus, left                                              | 9471 | 9067 | L | 349009 | 0 | 0 | 0 | 0 | 0 | 0 |
| *VTA | *VTA | ventral tegmental area, right                                             | 9068 | 9066 | R | 349009 | 2 | 1 | 0 | 0 | 0 | 0 |
| CLN  | N/A  | caudal linear nucleus, right                                              | 9475 | 9068 | R | 349009 | 0 | 0 | 0 | 0 | 0 | 0 |
| IF   | N/A  | interfascicular nucleus, right                                            | 9477 | 9068 | R | 349009 | 0 | 0 | 0 | 0 | 0 | 0 |
| PBP  | N/A  | parabrachial pigmented nucleus, right                                     | 9478 | 9068 | R | 349009 | 0 | 0 | 0 | 0 | 0 | 0 |

|          |       |                                      |      |      |   |        |   |   |   |   |   |   |
|----------|-------|--------------------------------------|------|------|---|--------|---|---|---|---|---|---|
| PN       | N/A   | paranigral nucleus, right            | 9479 | 9068 | R | 349009 | 0 | 0 | 0 | 0 | 0 | 0 |
| RL       | N/A   | rostral linear nucleus, right        | 9476 | 9068 | R | 349009 | 0 | 0 | 0 | 0 | 0 | 0 |
| VTg      | N/A   | ventral tegmental nucleus            | 9069 | 9002 |   | 349009 | 0 | 0 | 0 | 0 | 0 | 0 |
| VTg      | N/A   | ventral tegmental nucleus, left      | 9070 | 9069 | L | 349009 | 0 | 0 | 0 | 0 | 0 | 0 |
| VTg      | N/A   | ventral tegmental nucleus, right     | 9071 | 9069 | R | 349009 | 0 | 0 | 0 | 0 | 0 | 0 |
| PTec     | PTec  | pretectal region                     | 9079 | 9001 |   | 99033  | 2 | 1 | 0 | 1 | 0 | 0 |
| OT       | N/A   | nucleus of the optic tract           | 9080 | 9079 |   | 99033  | 0 | 0 | 0 | 0 | 0 | 0 |
| OT       | N/A   | nucleus of the optic tract, left     | 9081 | 9080 | L | 99033  | 0 | 0 | 0 | 0 | 0 | 0 |
| OT       | N/A   | nucleus of the optic tract, right    | 9082 | 9080 | R | 99033  | 0 | 0 | 0 | 0 | 0 | 0 |
| PTA      | N/A   | nucleus of the pretectal area        | 9083 | 9079 |   | 99033  | 0 | 0 | 0 | 0 | 0 | 0 |
| PTA      | N/A   | nucleus of the pretectal area, left  | 9084 | 9083 | L | 99033  | 0 | 0 | 0 | 0 | 0 | 0 |
| PTA      | N/A   | nucleus of the pretectal area, right | 9085 | 9083 | R | 99033  | 0 | 0 | 0 | 0 | 0 | 0 |
| OPt      | N/A   | olivary pretectal nucleus            | 9086 | 9079 |   | 99033  | 0 | 0 | 0 | 0 | 0 | 0 |
| OPt      | N/A   | olivary pretectal nucleus, left      | 9087 | 9086 | L | 99033  | 0 | 0 | 0 | 0 | 0 | 0 |
| OPt      | N/A   | olivary pretectal nucleus, right     | 9088 | 9086 | R | 99033  | 0 | 0 | 0 | 0 | 0 | 0 |
| PPt      | N/A   | principal pretectal nucleus          | 9089 | 9079 |   | 99033  | 0 | 0 | 0 | 0 | 0 | 0 |
| PPt      | N/A   | principal pretectal nucleus, left    | 9090 | 9089 | L | 99033  | 0 | 0 | 0 | 0 | 0 | 0 |
| PPt      | N/A   | principal pretectal nucleus, right   | 9091 | 9089 | R | 99033  | 0 | 0 | 0 | 0 | 0 | 0 |
| SLn      | N/A   | sublentiform nucleus                 | 9092 | 9079 |   | 99033  | 0 | 0 | 0 | 0 | 0 | 0 |
| SLn      | N/A   | sublentiform nucleus, left           | 9093 | 9092 | L | 99033  | 0 | 0 | 0 | 0 | 0 | 0 |
| SLn      | N/A   | sublentiform nucleus, right          | 9094 | 9092 | R | 99033  | 0 | 0 | 0 | 0 | 0 | 0 |
| MET      | N/A   | metencephalon                        | 4833 | 4006 |   | 02E1D2 | 0 | 0 | 0 | 0 | 0 | 0 |
| Cb       | N/A   | cerebellum                           | 4696 | 4833 |   | 03CFF3 | 0 | 0 | 0 | 0 | 0 | 0 |
| CbCx     | N/A   | cerebellar cortex                    | 4697 | 4696 |   | 00D5E8 | 0 | 0 | 0 | 0 | 0 | 0 |
| Ve       | N/A   | vermis                               | 4698 | 4697 |   | 00D5E8 | 0 | 0 | 0 | 0 | 0 | 0 |
| ALVCb    | N/A   | anterior lobe of the vermis          | 4699 | 4698 |   | 00D5E8 | 0 | 0 | 0 | 0 | 0 | 0 |
| Ve-I-II  | Cb_Ve | I-II                                 | 4700 | 4699 |   | 00D5E8 | 1 | 0 | 0 | 0 | 2 | 2 |
| Ve-III   | Cb_Ve | III                                  | 4701 | 4699 |   | 00D5E8 | 2 | 2 | 0 | 0 | 2 | 2 |
| Ve-IV    | Cb_Ve | IV                                   | 4702 | 4699 |   | 00D5E8 | 1 | 2 | 0 | 0 | 2 | 2 |
| Ve-V     | Cb_Ve | V                                    | 4703 | 4699 |   | 00D5E8 | 1 | 2 | 0 | 0 | 2 | 2 |
| PLVCb    | N/A   | posterior lobe of the vermis         | 4704 | 4698 |   | 00D5E8 | 0 | 0 | 0 | 0 | 0 | 0 |
| Ve-VI    | Cb_Ve | VI                                   | 4705 | 4704 |   | 00D5E8 | 1 | 2 | 0 | 0 | 2 | 2 |
| Ve-VIIAf | Cb_Ve | VIIAf                                | 4706 | 4704 |   | 00D5E8 | 1 | 0 | 0 | 0 | 2 | 2 |
| Ve-VIIAt | Cb_Ve | VIIAt                                | 4707 | 4704 |   | 00D5E8 | 1 | 2 | 0 | 0 | 2 | 2 |
| Ve-VIIB  | Cb_Ve | VIIB                                 | 4708 | 4704 |   | 00D5E8 | 1 | 2 | 0 | 0 | 2 | 2 |
| Ve-VIIIA | Cb_Ve | VIIIA                                | 4709 | 4704 |   | 00D5E8 | 1 | 2 | 0 | 0 | 2 | 2 |
| Ve-VIIIB | Cb_Ve | VIIIB                                | 4710 | 4704 |   | 00D5E8 | 1 | 2 | 0 | 0 | 2 | 2 |
| Ve-IX    | Cb_Ve | IX                                   | 4711 | 4704 |   | 00D5E8 | 1 | 2 | 0 | 0 | 2 | 2 |
| FNL      | N/A   | Flocculonodular Lobe of the Vermis   | 4712 | 4698 |   | 00D5E8 | 0 | 0 | 0 | 0 | 0 | 0 |
| Ve-X     | Cb_Ve | X                                    | 4713 | 4712 |   | 00D5E8 | 0 | 1 | 0 | 0 | 2 | 2 |

|             |        |                                    |       |       |   |        |   |   |   |   |   |   |
|-------------|--------|------------------------------------|-------|-------|---|--------|---|---|---|---|---|---|
| CbH         | N/A    | cerebellar hemispheres             | 12930 | 4697  |   | 00D5E8 | 0 | 0 | 0 | 0 | 0 | 0 |
| Cb-AL       | N/A    | Anterior Lobe                      | 12931 | 12930 |   | 00D5E8 | 0 | 0 | 0 | 0 | 0 | 0 |
| Cb-I-II     | N/A    | I-II                               | 12932 | 12931 |   | 00D5E8 | 0 | 0 | 0 | 0 | 0 | 0 |
| PV-I-II     | N/A    | I-II, left, paravermis             | 4717  | 12932 | L | 00D5E8 | 0 | 0 | 0 | 0 | 0 | 0 |
| He-I-II     | N/A    | I-II, left, lateral hemisphere     | 4733  | 12932 | L | 00D5E8 | 0 | 0 | 0 | 0 | 0 | 0 |
| PV-I-II     | N/A    | I-II, right, paravermis            | 4750  | 12932 | R | 00D5E8 | 0 | 0 | 0 | 0 | 0 | 0 |
| He-I-II     | N/A    | I-II, right, lateral hemisphere    | 4766  | 12932 | R | 00D5E8 | 0 | 0 | 0 | 0 | 0 | 0 |
| Cb-III      | N/A    | III                                | 12933 | 12931 |   | 00D5E8 | 0 | 0 | 0 | 0 | 0 | 0 |
| PV-III      | *Cb_PV | III, left, paravermis              | 4718  | 12933 | L | 00D5E8 | 1 | 0 | 2 | 2 | 0 | 2 |
| He-III      | *Cb_He | III, left, lateral hemisphere      | 4734  | 12933 | L | 00D5E8 | 0 | 0 | 2 | 0 | 0 | 2 |
| PV-III      | *Cb_PV | III, right, paravermis             | 4751  | 12933 | R | 00D5E8 | 1 | 0 | 0 | 0 | 0 | 0 |
| He-III      | N/A    | III, right, lateral hemisphere     | 4767  | 12933 | R | 00D5E8 | 0 | 0 | 0 | 0 | 0 | 0 |
| Cb-IV       | N/A    | IV                                 | 12934 | 12931 |   | 00D5E8 | 0 | 0 | 0 | 0 | 0 | 0 |
| *PV-IV      | *Cb_PV | IV, left, paravermis               | 4719  | 12934 | L | 00D5E8 | 1 | 2 | 2 | 2 | 2 | 2 |
| He-IV       | *Cb_He | IV, left, lateral hemisphere       | 4735  | 12934 | L | 00D5E8 | 0 | 0 | 2 | 2 | 2 | 2 |
| *PV-IV      | *Cb_PV | IV, right, paravermis              | 4752  | 12934 | R | 00D5E8 | 1 | 0 | 0 | 0 | 0 | 0 |
| He-IV       | N/A    | IV, right, lateral hemisphere      | 4768  | 12934 | R | 00D5E8 | 0 | 0 | 0 | 0 | 0 | 0 |
| Cb-V        | N/A    | V                                  | 12935 | 12931 |   | 00D5E8 | 0 | 0 | 0 | 0 | 0 | 0 |
| *PV-V       | *Cb_PV | V, left, paravermis                | 4720  | 12935 | L | 00D5E8 | 1 | 2 | 2 | 2 | 2 | 2 |
| He-V        | *Cb_He | V, left, lateral hemisphere        | 4736  | 12935 | L | 00D5E8 | 0 | 0 | 2 | 4 | 2 | 2 |
| *PV-V       | *Cb_PV | V, right, paravermis               | 4753  | 12935 | R | 00D5E8 | 1 | 2 | 0 | 0 | 0 | 0 |
| He-V        | N/A    | V, right, lateral hemisphere       | 4769  | 12935 | R | 00D5E8 | 0 | 0 | 0 | 0 | 0 | 0 |
| Cb-PL       | N/A    | Posterior Lobe                     | 12936 | 12930 |   | 00D5E8 | 0 | 0 | 0 | 0 | 0 | 0 |
| Cb-VI       | N/A    | VI                                 | 12937 | 12936 |   | 00D5E8 | 0 | 0 | 0 | 0 | 0 | 0 |
| *PV-VI      | *Cb_PV | VI, left, paravermis               | 4722  | 12937 | L | 00D5E8 | 1 | 2 | 2 | 2 | 2 | 2 |
| *He-VI      | *Cb_He | VI, left, lateral hemisphere       | 4738  | 12937 | L | 00D5E8 | 1 | 2 | 2 | 3 | 2 | 4 |
| *PV-VI      | *Cb_PV | VI, right, paravermis              | 4755  | 12937 | R | 00D5E8 | 1 | 2 | 0 | 0 | 0 | 0 |
| *He-VI      | *Cb_He | VI, right, lateral hemisphere      | 4771  | 12937 | R | 00D5E8 | 1 | 2 | 0 | 0 | 0 | 0 |
| Cb-Crus I   | N/A    | crus I                             | 12938 | 12936 |   | 00D5E8 | 0 | 0 | 0 | 0 | 0 | 0 |
| *PV-Crus I  | *Cb_PV | Crus I, left, paravermis           | 4723  | 12938 | L | 00D5E8 | 1 | 2 | 2 | 2 | 2 | 2 |
| *He-Crus I  | *Cb_He | Crus I, left, lateral hemisphere   | 4739  | 12938 | L | 00D5E8 | 1 | 2 | 2 | 4 | 2 | 4 |
| *PV-Crus I  | *Cb_PV | Crus I, right, paravermis          | 4756  | 12938 | R | 00D5E8 | 1 | 2 | 0 | 0 | 0 | 0 |
| *He-Crus I  | *Cb_He | Crus I, right, lateral hemisphere  | 4772  | 12938 | R | 00D5E8 | 1 | 4 | 0 | 0 | 0 | 0 |
| Cb-Crus II  | N/A    | crus II                            | 12939 | 12936 |   | 00D5E8 | 0 | 0 | 0 | 0 | 0 | 0 |
| *PV-Crus II | *Cb_PV | Crus II, left, paravermis          | 4724  | 12939 | L | 00D5E8 | 1 | 2 | 2 | 2 | 2 | 2 |
| *He-Crus II | *Cb_He | Crus II, left, lateral hemisphere  | 4740  | 12939 | L | 00D5E8 | 1 | 4 | 2 | 4 | 2 | 4 |
| *PV-Crus II | *Cb_PV | Crus II, right, paravermis         | 4757  | 12939 | R | 00D5E8 | 1 | 0 | 0 | 0 | 0 | 0 |
| *He-Crus II | *Cb_He | Crus II, right, lateral hemisphere | 4773  | 12939 | R | 00D5E8 | 1 | 4 | 0 | 0 | 0 | 0 |
| Cb-VIIB     | N/A    | VIIB                               | 12940 | 12936 |   | 00D5E8 | 0 | 0 | 0 | 0 | 0 | 0 |
| *PV-VIIB    | *Cb_PV | VIIB, left, paravermis             | 4725  | 12940 | L | 00D5E8 | 1 | 2 | 2 | 2 | 2 | 2 |

|          |        |                                  |       |       |   |        |   |   |   |   |   |   |
|----------|--------|----------------------------------|-------|-------|---|--------|---|---|---|---|---|---|
| *He-VIIB | *Cb_He | VIIB, left, lateral hemisphere   | 4741  | 12940 | L | 00D5E8 | 1 | 1 | 2 | 4 | 2 | 4 |
| *PV-VIIB | *Cb_PV | VIIB, right, paravermis          | 4758  | 12940 | R | 00D5E8 | 1 | 2 | 0 | 0 | 0 | 0 |
| *He-VIIB | *Cb_He | VIIB, right, lateral hemisphere  | 4774  | 12940 | R | 00D5E8 | 1 | 2 | 0 | 0 | 0 | 0 |
| Cb-VIIIA | N/A    | VIIIA                            | 12941 | 12936 |   | 00D5E8 | 0 | 0 | 0 | 0 | 0 | 0 |
| PV-VIIIA | *Cb_PV | VIIIA, left, paravermis          | 4726  | 12941 | L | 00D5E8 | 1 | 2 | 2 | 0 | 2 | 2 |
| He-VIIIA | *Cb_He | VIIIA, left, lateral hemisphere  | 4742  | 12941 | L | 00D5E8 | 0 | 2 | 2 | 4 | 2 | 4 |
| PV-VIIIA | *Cb_PV | VIIIA, right, paravermis         | 4759  | 12941 | R | 00D5E8 | 1 | 2 | 0 | 0 | 0 | 0 |
| He-VIIIA | *Cb_He | VIIIA, right, lateral hemisphere | 4775  | 12941 | R | 00D5E8 | 1 | 0 | 0 | 0 | 0 | 0 |
| Cb-VIIIB | N/A    | VIIIB                            | 12942 | 12936 |   | 00D5E8 | 0 | 0 | 0 | 0 | 0 | 0 |
| PV-VIIIB | *Cb_PV | VIIIB, left, paravermis          | 4727  | 12942 | L | 00D5E8 | 1 | 1 | 2 | 0 | 1 | 2 |
| He-VIIIB | *Cb_He | VIIIB, left, lateral hemisphere  | 4743  | 12942 | L | 00D5E8 | 0 | 0 | 2 | 1 | 2 | 2 |
| PV-VIIIB | *Cb_PV | VIIIB, right, paravermis         | 4760  | 12942 | R | 00D5E8 | 1 | 2 | 0 | 0 | 0 | 0 |
| He-VIIIB | N/A    | VIIIB, right, lateral hemisphere | 4776  | 12942 | R | 00D5E8 | 0 | 0 | 0 | 0 | 0 | 0 |
| Cb-IX    | N/A    | IX                               | 12943 | 12936 |   | 00D5E8 | 0 | 0 | 0 | 0 | 0 | 0 |
| PV-IX    | *Cb_PV | IX, left, paravermis             | 4728  | 12943 | L | 00D5E8 | 1 | 2 | 2 | 0 | 2 | 2 |
| He-IX    | *Cb_He | IX, left, lateral hemisphere     | 4744  | 12943 | L | 00D5E8 | 0 | 0 | 2 | 2 | 0 | 0 |
| PV-IX    | *Cb_PV | IX, right, paravermis            | 4761  | 12943 | R | 00D5E8 | 1 | 2 | 0 | 0 | 0 | 0 |
| He-IX    | N/A    | IX, right, lateral hemisphere    | 4777  | 12943 | R | 00D5E8 | 0 | 0 | 0 | 0 | 0 | 0 |
| Cb-FNL   | N/A    | flocculonodular lobe             | 12944 | 12930 |   | 00D5E8 | 0 | 0 | 0 | 0 | 0 | 0 |
| Cb-X     | N/A    | X                                | 12945 | 12944 |   | 00D5E8 | 0 | 0 | 0 | 0 | 0 | 0 |
| PV-X     | N/A    | X, left, paravermis              | 4730  | 12945 | L | 00D5E8 | 0 | 0 | 0 | 0 | 0 | 0 |
| He-X     | *Cb_He | X, left, lateral hemisphere      | 4746  | 12945 | L | 00D5E8 | 0 | 0 | 0 | 1 | 2 | 2 |
| PV-X     | *Cb_PV | X, right, paravermis             | 4763  | 12945 | R | 00D5E8 | 0 | 2 | 0 | 0 | 0 | 0 |
| He-X     | N/A    | X, right, lateral hemisphere     | 4779  | 12945 | R | 00D5E8 | 0 | 0 | 0 | 0 | 0 | 0 |
| CbN      | N/A    | cerebellar nuclei                | 4780  | 4696  |   | 06CAFF | 0 | 0 | 0 | 0 | 0 | 0 |
| *Dt      | N/A    | dentate nucleus                  | 12946 | 4780  |   | 06CAFF | 0 | 0 | 0 | 0 | 0 | 0 |
| *Dt      | *Dt    | dentate nucleus, left            | 4782  | 12946 | L | 06CAFF | 2 | 2 | 2 | 2 | 2 | 2 |
| *Dt      | *Dt    | dentate nucleus, right           | 4787  | 12946 | R | 06CAFF | 3 | 2 | 0 | 0 | 0 | 0 |
| Emb      | N/A    | emboliform nucleus               | 12947 | 4780  |   | 06CAFF | 0 | 0 | 0 | 0 | 0 | 0 |
| Emb      | Emb    | emboliform nucleus, left         | 4783  | 12947 | L | 06CAFF | 1 | 1 | 0 | 0 | 0 | 1 |
| Emb      | Emb    | emboliform nucleus, right        | 4788  | 12947 | R | 06CAFF | 1 | 0 | 0 | 0 | 0 | 0 |
| Fas      | N/A    | fastigial nucleus                | 12948 | 4780  |   | 06CAFF | 0 | 0 | 0 | 0 | 0 | 0 |
| Fas      | Fas    | fastigial nucleus, left          | 4784  | 12948 | L | 06CAFF | 1 | 1 | 0 | 1 | 0 | 0 |
| Fas      | Fas    | fastigial nucleus, right         | 4789  | 12948 | R | 06CAFF | 2 | 0 | 0 | 0 | 0 | 0 |
| Glo      | N/A    | globose nucleus                  | 12949 | 4780  |   | 06CAFF | 0 | 0 | 0 | 0 | 0 | 0 |
| Glo      | Glo    | globose nucleus, left            | 4785  | 12949 | L | 06CAFF | 1 | 1 | 0 | 1 | 0 | 1 |
| Glo      | Glo    | globose nucleus, right           | 4790  | 12949 | R | 06CAFF | 1 | 0 | 0 | 0 | 0 | 0 |
| Pons     | N/A    | pons                             | 9131  | 4833  |   | 00F3B2 | 0 | 0 | 0 | 0 | 0 | 0 |
| Bpons    | N/A    | basal part of pons               | 9132  | 9131  |   | 00E8BB | 0 | 0 | 0 | 0 | 0 | 0 |
| *Pn      | N/A    | pontine nuclei                   | 9133  | 9132  |   | 00E8BB | 0 | 0 | 0 | 0 | 0 | 0 |

|      |      |                                                |           |           |   |        |   |   |   |   |   |   |
|------|------|------------------------------------------------|-----------|-----------|---|--------|---|---|---|---|---|---|
| *Pn  | *Pn  | pontine nuclei, left                           | 9492      | 9133      | L | 00E8BB | 5 | 6 | 4 | 7 | 8 | 5 |
| *Pn  | *Pn  | pontine nuclei, right                          | 9493      | 9133      | R | 00E8BB | 7 | 6 | 0 | 0 | 0 | 0 |
| PTg  | N/A  | pontine tegmentum                              | 9135      | 9131      |   | 00FFAA | 0 | 0 | 0 | 0 | 0 | 0 |
| 6    | N/A  | abducens nucleus                               | 9136      | 9135      |   | 00FFAA | 0 | 0 | 0 | 0 | 0 | 0 |
| 6    | 6    | abducens nucleus, left                         | 9137      | 9136      | L | 00FFAA | 2 | 1 | 0 | 1 | 1 | 2 |
| 6    | 6    | abducens nucleus, right                        | 9138      | 9136      | R | 00FFAA | 2 | 1 | 0 | 0 | 0 | 0 |
| Acs7 | N/A  | accessory facial nucleus                       | 9494      | 9135      |   | 00FFAA | 0 | 0 | 0 | 0 | 0 | 0 |
| Acs7 | N/A  | accessory facial nucleus, left                 | 9495      | 9494      | L | 00FFAA | 0 | 0 | 0 | 0 | 0 | 0 |
| Acs7 | N/A  | accessory facial nucleus, right                | 9496      | 9494      | R | 00FFAA | 0 | 0 | 0 | 0 | 0 | 0 |
| Acs5 | N/A  | accessory trigeminal nucleus                   | 9497      | 9135      |   | 00FFAA | 0 | 0 | 0 | 0 | 0 | 0 |
| Acs5 | N/A  | accessory trigeminal nucleus, left             | 9498      | 9497      | L | 00FFAA | 0 | 0 | 0 | 0 | 0 | 0 |
| Acs5 | N/A  | accessory trigeminal nucleus, right            | 9499      | 9497      | R | 00FFAA | 0 | 0 | 0 | 0 | 0 | 0 |
| CGPo | N/A  | central gray of the pons                       | 10147     | 9135      |   | 00FFAA | 0 | 0 | 0 | 0 | 0 | 0 |
| CGPo | CGPo | central gray of the pons, left                 | 10148     | 10147     | L | 00FFAA | 0 | 1 | 0 | 0 | 0 | 2 |
| CGPo | CGPo | central gray of the pons, right                | 10149     | 10147     | R | 00FFAA | 0 | 1 | 0 | 0 | 0 | 0 |
| DLL  | N/A  | dorsal nucleus of lateral lemniscus            | 9139      | 9135      |   | 00FFAA | 0 | 0 | 0 | 0 | 0 | 0 |
| DLL  | N/A  | dorsal nucleus of lateral lemniscus, left      | 9140      | 9139      | L | 00FFAA | 0 | 0 | 0 | 0 | 0 | 0 |
| DLL  | N/A  | dorsal nucleus of lateral lemniscus, right     | 9141      | 9139      | R | 00FFAA | 0 | 0 | 0 | 0 | 0 | 0 |
| DMTg | N/A  | dorsomedial tegmental area                     | 265504864 | 9135      |   | 00FFAA | 0 | 0 | 0 | 0 | 0 | 0 |
| DMTg | N/A  | dorsomedial tegmental area, left               | 265504868 | 265504864 | L | 00FFAA | 0 | 0 | 0 | 0 | 0 | 0 |
| DMTg | N/A  | dorsomedial tegmental area, right              | 265504872 | 265504864 | R | 00FFAA | 0 | 0 | 0 | 0 | 0 | 0 |
| DTg  | N/A  | dorsal tegmental nucleus                       | 265504876 | 9135      |   | 00FFAA | 0 | 0 | 0 | 0 | 0 | 0 |
| DTg  | N/A  | dorsal tegmental nucleus, left                 | 265504880 | 265504876 | L | 00FFAA | 0 | 0 | 0 | 0 | 0 | 0 |
| DTg  | N/A  | dorsal tegmental nucleus, right                | 265504884 | 265504876 | R | 00FFAA | 0 | 0 | 0 | 0 | 0 | 0 |
| 7    | N/A  | facial motor nucleus                           | 9142      | 9135      |   | 00FFAA | 0 | 0 | 0 | 0 | 0 | 0 |
| 7    | 7    | facial motor nucleus, left                     | 9143      | 9142      | L | 00FFAA | 1 | 2 | 0 | 3 | 3 | 2 |
| 7L   | N/A  | facial motor nucleus, left, lateral part       | 9501      | 9143      | L | 00FFAA | 0 | 0 | 0 | 0 | 0 | 0 |
| 7I   | N/A  | facial motor nucleus, left, intermediate part  | 9502      | 9143      | L | 00FFAA | 0 | 0 | 0 | 0 | 0 | 0 |
| 7M   | N/A  | facial motor nucleus, left, medial part        | 9500      | 9143      | L | 00FFAA | 0 | 0 | 0 | 0 | 0 | 0 |
| P7   | N/A  | facial motor nucleus, left, perifacial zone    | 9505      | 9143      | L | 00FFAA | 0 | 0 | 0 | 0 | 0 | 0 |
| 7vl  | N/A  | facial motor nucleus, left, ventral part       | 9503      | 9143      | L | 00FFAA | 0 | 0 | 0 | 0 | 0 | 0 |
| 7VL  | N/A  | facial motor nucleus, left, ventrolateral part | 9504      | 9143      | L | 00FFAA | 0 | 0 | 0 | 0 | 0 | 0 |
| 7    | 7    | facial motor nucleus, right                    | 9144      | 9142      | R | 00FFAA | 2 | 1 | 0 | 0 | 0 | 0 |
| 7L   | N/A  | facial motor nucleus, right, lateral part      | 9507      | 9144      | R | 00FFAA | 0 | 0 | 0 | 0 | 0 | 0 |
| 7I   | N/A  | facial motor nucleus, right, intermediate part | 9508      | 9144      | R | 00FFAA | 0 | 0 | 0 | 0 | 0 | 0 |
| 7M   | N/A  | facial motor nucleus, right, medial part       | 9506      | 9144      | R | 00FFAA | 0 | 0 | 0 | 0 | 0 | 0 |
| P7   | N/A  | facial motor nucleus, right, perifacial zone   | 9511      | 9144      | R | 00FFAA | 0 | 0 | 0 | 0 | 0 | 0 |
| 7vl  | N/A  | facial motor nucleus, right, ventral part      | 9509      | 9144      | R | 00FFAA | 0 | 0 | 0 | 0 | 0 | 0 |



|      |      |                                                  |           |           |   |        |   |   |   |   |   |   |
|------|------|--------------------------------------------------|-----------|-----------|---|--------|---|---|---|---|---|---|
| 7VL  | N/A  | facial motor nucleus, right, ventrolateral part  | 9510      | 9144      | R | 00FFAA | 0 | 0 | 0 | 0 | 0 | 0 |
| ILL  | N/A  | intermediate nucleus of lateral lemniscus        | 265504888 | 9135      |   | 00FFAA | 0 | 0 | 0 | 0 | 0 | 0 |
| ILL  | N/A  | intermediate nucleus of lateral lemniscus, left  | 265504892 | 265504888 | L | 00FFAA | 0 | 0 | 0 | 0 | 0 | 0 |
| ILL  | N/A  | intermediate nucleus of lateral lemniscus, right | 265504896 | 265504888 | R | 00FFAA | 0 | 0 | 0 | 0 | 0 | 0 |
| LDTg | N/A  | lateral dorsal tegmental nucleus                 | 9452      | 9135      |   | 00FFAA | 0 | 0 | 0 | 0 | 0 | 0 |
| LDTg | N/A  | lateral dorsal tegmental nucleus, left           | 9453      | 9452      | L | 00FFAA | 0 | 0 | 0 | 0 | 0 | 0 |
| LDTg | N/A  | lateral dorsal tegmental nucleus, right          | 9454      | 9452      | R | 00FFAA | 0 | 0 | 0 | 0 | 0 | 0 |
| LPB  | N/A  | lateral parabrachial nucleus                     | 9145      | 9135      |   | 00FFAA | 0 | 0 | 0 | 0 | 0 | 0 |
| LPB  | LPB  | lateral parabrachial nucleus, left               | 9146      | 9145      | L | 00FFAA | 2 | 2 | 1 | 1 | 0 | 1 |
| LPB  | LPB  | lateral parabrachial nucleus, right              | 9147      | 9145      | R | 00FFAA | 2 | 0 | 0 | 0 | 0 | 0 |
| LC   | N/A  | locus ceruleus                                   | 9148      | 9135      |   | 00FFAA | 0 | 0 | 0 | 0 | 0 | 0 |
| LC   | LC   | locus ceruleus, left                             | 9149      | 9148      | L | 00FFAA | 4 | 2 | 0 | 0 | 3 | 2 |
| LC   | LC   | locus ceruleus, right                            | 9150      | 9148      | R | 00FFAA | 4 | 2 | 0 | 0 | 0 | 0 |
| MPB  | N/A  | medial parabrachial nucleus                      | 9151      | 9135      |   | 00FFAA | 0 | 0 | 0 | 0 | 0 | 0 |
| MPB  | MPB  | medial parabrachial nucleus, left                | 9152      | 9151      | L | 00FFAA | 1 | 3 | 0 | 2 | 1 | 2 |
| MPB  | MPB  | medial parabrachial nucleus, right               | 9153      | 9151      | R | 00FFAA | 1 | 2 | 0 | 0 | 0 | 0 |
| SubC | N/A  | nucleus subceruleus                              | 9154      | 9135      |   | 00FFAA | 0 | 0 | 0 | 0 | 0 | 0 |
| SubC | SubC | nucleus subceruleus, left                        | 9155      | 9154      | L | 00FFAA | 2 | 2 | 0 | 2 | 1 | 1 |
| SubC | SubC | nucleus subceruleus, right                       | 9156      | 9154      | R | 00FFAA | 2 | 2 | 0 | 0 | 0 | 0 |
| PnG  | N/A  | pontine gamma nucleus                            | 272788859 | 9135      |   | 00FFAA | 0 | 0 | 0 | 0 | 0 | 0 |
| PnG  | N/A  | pontine gamma nucleus, left                      | 272788863 | 272788859 | L | 00FFAA | 0 | 0 | 0 | 0 | 0 | 0 |
| PnG  | N/A  | pontine gamma nucleus, right                     | 272788867 | 272788859 | R | 00FFAA | 0 | 0 | 0 | 0 | 0 | 0 |
| RPn  | RPn  | pontine raphe nucleus                            | 9157      | 9135      |   | 00FFAA | 1 | 1 | 0 | 0 | 0 | 0 |
| RPn  | RPn  | pontine raphe nucleus, left                      | 9158      | 9157      | L | 00FFAA | 0 | 0 | 0 | 2 | 2 | 1 |
| RPn  | N/A  | pontine raphe nucleus, right                     | 9159      | 9157      | R | 00FFAA | 0 | 0 | 0 | 0 | 0 | 0 |
| PPRF | N/A  | paramedian pontine reticular formation           | 9160      | 9135      |   | 00FFAA | 0 | 0 | 0 | 0 | 0 | 0 |
| *PRF | *PRF | pontine reticular formation, left                | 9161      | 9160      | L | 00FFAA | 3 | 3 | 1 | 3 | 4 | 2 |
| PnC  | N/A  | caudal pontine reticular nucleus, left           | 9162      | 9161      | L | 00FFAA | 0 | 0 | 0 | 0 | 0 | 0 |
| PnO  | N/A  | oral pontine reticular nucleus, left             | 9166      | 9161      | L | 00FFAA | 0 | 0 | 0 | 0 | 0 | 0 |
| RtTg | N/A  | reticulotegmental nucleus, left                  | 9167      | 9161      | L | 00FFAA | 0 | 0 | 0 | 0 | 0 | 0 |
| *PRF | *PRF | pontine reticular formation, right               | 9169      | 9160      | R | 00FFAA | 4 | 4 | 0 | 0 | 0 | 0 |
| PnC  | N/A  | caudal pontine reticular nucleus, right          | 9170      | 9169      | R | 00FFAA | 0 | 0 | 0 | 0 | 0 | 0 |
| PnO  | N/A  | oral pontine reticular nucleus, right            | 9174      | 9169      | R | 00FFAA | 0 | 0 | 0 | 0 | 0 | 0 |
| RtTg | N/A  | reticulotegmental nucleus, right                 | 9175      | 9169      | R | 00FFAA | 0 | 0 | 0 | 0 | 0 | 0 |
| SOC  | N/A  | superior olivary complex                         | 9177      | 9135      |   | 00FFAA | 0 | 0 | 0 | 0 | 0 | 0 |
| SOC  | SOC  | superior olivary complex, left                   | 9178      | 9177      | L | 00FFAA | 3 | 2 | 0 | 3 | 2 | 2 |
| PeO  | N/A  | periolivary nucleus, left                        | 9179      | 9178      | L | 00FFAA | 0 | 0 | 0 | 0 | 0 | 0 |

|     |     |                                                      |           |      |   |        |   |   |   |   |   |   |
|-----|-----|------------------------------------------------------|-----------|------|---|--------|---|---|---|---|---|---|
| PrO | N/A | preolivary nucleus, left                             | 9180      | 9178 | L | 00FFAA | 0 | 0 | 0 | 0 | 0 | 0 |
| RO  | N/A | retro-olivary cell group, left                       | 9181      | 9178 | L | 00FFAA | 0 | 0 | 0 | 0 | 0 | 0 |
| SOI | N/A | superior olive, left                                 | 9182      | 9178 | L | 00FFAA | 0 | 0 | 0 | 0 | 0 | 0 |
| LSO | N/A | lateral superior olivary nucleus, left               | 9183      | 9182 | L | 00FFAA | 0 | 0 | 0 | 0 | 0 | 0 |
| MSO | N/A | medial superior olivary nucleus, left                | 9184      | 9182 | L | 00FFAA | 0 | 0 | 0 | 0 | 0 | 0 |
| SPO | N/A | superior paraolivary nucleus, left                   | 265504906 | 9178 | L | 00FFAA | 0 | 0 | 0 | 0 | 0 | 0 |
| Tz  | N/A | trapezoid nuclei, left                               | 9185      | 9178 | L | 00FFAA | 0 | 0 | 0 | 0 | 0 | 0 |
| SOC | SOC | superior olivary complex, right                      | 9186      | 9177 | R | 00FFAA | 3 | 2 | 0 | 0 | 0 | 0 |
| PeO | N/A | periolivary nucleus, right                           | 9187      | 9186 | R | 00FFAA | 0 | 0 | 0 | 0 | 0 | 0 |
| PrO | N/A | preolivary nucleus, right                            | 9188      | 9186 | R | 00FFAA | 0 | 0 | 0 | 0 | 0 | 0 |
| RO  | N/A | retro-olivary cell group, right                      | 9189      | 9186 | R | 00FFAA | 0 | 0 | 0 | 0 | 0 | 0 |
| SOI | N/A | superior olive, right                                | 9190      | 9186 | R | 00FFAA | 0 | 0 | 0 | 0 | 0 | 0 |
| LSO | N/A | lateral superior olivary nucleus, right              | 9191      | 9190 | R | 00FFAA | 0 | 0 | 0 | 0 | 0 | 0 |
| MSO | N/A | medial superior olivary nucleus, right               | 9192      | 9190 | R | 00FFAA | 0 | 0 | 0 | 0 | 0 | 0 |
| SPO | N/A | superior paraolivary nucleus, right                  | 265504910 | 9186 | R | 00FFAA | 0 | 0 | 0 | 0 | 0 | 0 |
| Tz  | N/A | trapezoid nuclei, right                              | 9193      | 9186 | R | 00FFAA | 0 | 0 | 0 | 0 | 0 | 0 |
| SuS | N/A | superior salivatory nucleus                          | 9194      | 9135 |   | 00FFAA | 0 | 0 | 0 | 0 | 0 | 0 |
| SuS | N/A | superior salivatory nucleus, left                    | 9195      | 9194 | L | 00FFAA | 0 | 0 | 0 | 0 | 0 | 0 |
| SuS | N/A | superior salivatory nucleus, right                   | 9196      | 9194 | R | 00FFAA | 0 | 0 | 0 | 0 | 0 | 0 |
| tz  | N/A | trapezoid body                                       | 9197      | 9135 |   | 00FFAA | 0 | 0 | 0 | 0 | 0 | 0 |
| tz  | N/A | trapezoid body, left                                 | 9198      | 9197 | L | 00FFAA | 0 | 0 | 0 | 0 | 0 | 0 |
| tz  | N/A | trapezoid body, right                                | 9199      | 9197 | R | 00FFAA | 0 | 0 | 0 | 0 | 0 | 0 |
| 5   | N/A | trigeminal nuclei                                    | 9203      | 9135 |   | 00FFAA | 0 | 0 | 0 | 0 | 0 | 0 |
| 5   | N/A | trigeminal nuclei, left                              | 9204      | 9203 | L | 00FFAA | 0 | 0 | 0 | 0 | 0 | 0 |
| Me5 | N/A | mesencephalic nucleus of trigeminal nerve, left      | 9205      | 9204 | L | 00FFAA | 0 | 0 | 0 | 0 | 0 | 0 |
| Mo5 | Mo5 | motor nucleus of trigeminal nerve, left              | 9206      | 9204 | L | 00FFAA | 1 | 1 | 0 | 2 | 2 | 2 |
| Pr5 | Pr5 | principal sensory nucleus of trigeminal nerve, left  | 9207      | 9204 | L | 00FFAA | 1 | 1 | 0 | 0 | 2 | 2 |
| 5   | N/A | trigeminal nuclei, right                             | 9211      | 9203 | R | 00FFAA | 0 | 0 | 0 | 0 | 0 | 0 |
| Me5 | N/A | mesencephalic nucleus of trigeminal nerve, right     | 9212      | 9211 | R | 00FFAA | 0 | 0 | 0 | 0 | 0 | 0 |
| Mo5 | Mo5 | motor nucleus of trigeminal nerve, right             | 9213      | 9211 | R | 00FFAA | 1 | 1 | 0 | 0 | 0 | 0 |
| Pr5 | Pr5 | principal sensory nucleus of trigeminal nerve, right | 9214      | 9211 | R | 00FFAA | 2 | 1 | 0 | 0 | 0 | 0 |
| VLL | N/A | ventral nucleus of lateral lemniscus                 | 9200      | 9135 |   | 00FFAA | 0 | 0 | 0 | 0 | 0 | 0 |
| VLL | N/A | ventral nucleus of lateral lemniscus, left           | 9201      | 9200 | L | 00FFAA | 0 | 0 | 0 | 0 | 0 | 0 |
| VLL | N/A | ventral nucleus of lateral lemniscus, right          | 9202      | 9200 | R | 00FFAA | 0 | 0 | 0 | 0 | 0 | 0 |
| MY  | N/A | myelencephalon                                       | 9512      | 4006 |   | 1F67CC | 0 | 0 | 0 | 0 | 0 | 0 |
| ACu | N/A | accessory cuneate nucleus                            | 9513      | 9512 |   | 0149AE | 0 | 0 | 0 | 0 | 0 | 0 |

|      |       |                                          |           |           |   |        |   |   |   |   |   |   |
|------|-------|------------------------------------------|-----------|-----------|---|--------|---|---|---|---|---|---|
| ACu  | N/A   | accessory cuneate nucleus, left          | 9514      | 9513      | L | 0149AE | 0 | 0 | 0 | 0 | 0 | 0 |
| ACu  | N/A   | accessory cuneate nucleus, right         | 9515      | 9513      | R | 0149AE | 0 | 0 | 0 | 0 | 0 | 0 |
| Amb  | N/A   | ambiguus nucleus                         | 9516      | 9512      |   | 034BB0 | 0 | 0 | 0 | 0 | 0 | 0 |
| Amb  | N/A   | ambiguus nucleus, left                   | 9517      | 9516      | L | 034BB0 | 0 | 0 | 0 | 0 | 0 | 0 |
| Amb  | N/A   | ambiguus nucleus, right                  | 9518      | 9516      | R | 034BB0 | 0 | 0 | 0 | 0 | 0 | 0 |
| *Arc | N/A   | arcuate nucleus of medulla               | 9519      | 9512      |   | 054DB2 | 0 | 0 | 0 | 0 | 0 | 0 |
| *Arc | *Arc  | arcuate nucleus of medulla, left         | 9520      | 9519      | L | 054DB2 | 4 | 4 | 2 | 4 | 3 | 1 |
| *Arc | *Arc  | arcuate nucleus of medulla, right        | 9521      | 9519      | R | 054DB2 | 4 | 2 | 0 | 0 | 0 | 0 |
| AP   | N/A   | area postrema                            | 9522      | 9512      |   | 074FB4 | 0 | 0 | 0 | 0 | 0 | 0 |
| AP   | N/A   | area postrema, left                      | 9523      | 9522      | L | 074FB4 | 0 | 0 | 0 | 0 | 0 | 0 |
| AP   | N/A   | area postrema, right                     | 9524      | 9522      | R | 074FB4 | 0 | 0 | 0 | 0 | 0 | 0 |
| *CGS | **CGS | central glial substance                  | 9525      | 9512      |   | 0951B6 | 4 | 2 | 0 | 2 | 1 | 0 |
| *CGS | N/A   | central glial substance, left            | 9526      | 9525      | L | 0951B6 | 0 | 0 | 0 | 0 | 0 | 0 |
| *CGS | N/A   | central glial substance, right           | 9527      | 9525      | R | 0951B6 | 0 | 0 | 0 | 0 | 0 | 0 |
| CGMe | N/A   | central gray of the medulla              | 265504914 | 9512      |   | 064EB3 | 0 | 0 | 0 | 0 | 0 | 0 |
| CGMe | N/A   | central gray of the medulla, left        | 265504918 | 265504914 | L | 064EB3 | 0 | 0 | 0 | 0 | 0 | 0 |
| CGMe | N/A   | central gray of the medulla, right       | 265504922 | 265504914 | R | 064EB3 | 0 | 0 | 0 | 0 | 0 | 0 |
| 8Co  | N/A   | cochlear nuclei                          | 9528      | 9512      |   | 0A52B7 | 0 | 0 | 0 | 0 | 0 | 0 |
| 8Co  | 8Co   | cochlear nuclei, left                    | 9529      | 9528      | L | 0A52B7 | 1 | 2 | 0 | 1 | 2 | 1 |
| DCo  | N/A   | dorsal cochlear nucleus, left            | 9530      | 9529      | L | 0A52B7 | 0 | 0 | 0 | 0 | 0 | 0 |
| VCo  | N/A   | ventral cochlear nuclei, left            | 9531      | 9529      | L | 0A52B7 | 0 | 0 | 0 | 0 | 0 | 0 |
| AVCo | N/A   | anteroventral cochlear nucleus, left     | 9532      | 9531      | L | 0A52B7 | 0 | 0 | 0 | 0 | 0 | 0 |
| PVCo | N/A   | posteroventral cochlear nucleus, left    | 9533      | 9531      | L | 0A52B7 | 0 | 0 | 0 | 0 | 0 | 0 |
| 8Co  | 8Co   | cochlear nuclei, right                   | 9534      | 9528      | R | 0A52B7 | 1 | 0 | 0 | 0 | 0 | 0 |
| DCo  | N/A   | dorsal cochlear nucleus, right           | 9535      | 9534      | R | 0A52B7 | 0 | 0 | 0 | 0 | 0 | 0 |
| VCo  | N/A   | ventral cochlear nuclei, right           | 9536      | 9534      | R | 0A52B7 | 0 | 0 | 0 | 0 | 0 | 0 |
| AVCo | N/A   | anteroventral cochlear nucleus, right    | 9537      | 9536      | R | 0A52B7 | 0 | 0 | 0 | 0 | 0 | 0 |
| PVCo | N/A   | posteroventral cochlear nucleus, right   | 9538      | 9536      | R | 0A52B7 | 0 | 0 | 0 | 0 | 0 | 0 |
| CT   | N/A   | conterminalis                            | 9539      | 9512      |   | 0C54B9 | 0 | 0 | 0 | 0 | 0 | 0 |
| CT   | N/A   | conterminalis, left                      | 9540      | 9539      | L | 0C54B9 | 0 | 0 | 0 | 0 | 0 | 0 |
| CT   | N/A   | conterminalis, right                     | 9541      | 9539      | R | 0C54B9 | 0 | 0 | 0 | 0 | 0 | 0 |
| *Cu  | N/A   | cuneate nucleus                          | 9542      | 9512      |   | 0E56BB | 0 | 0 | 0 | 0 | 0 | 0 |
| *Cu  | *Cu   | cuneate nucleus, left                    | 9543      | 9542      | L | 0E56BB | 2 | 4 | 1 | 4 | 2 | 3 |
| *Cu  | *Cu   | cuneate nucleus, right                   | 9544      | 9542      | R | 0E56BB | 3 | 3 | 0 | 0 | 0 | 0 |
| 10   | N/A   | dorsal motor nucleus of the vagus        | 9545      | 9512      |   | 1058BD | 0 | 0 | 0 | 0 | 0 | 0 |
| 10   | 10    | dorsal motor nucleus of the vagus, left  | 9546      | 9545      | L | 1058BD | 3 | 3 | 0 | 0 | 2 | 2 |
| 10   | 10    | dorsal motor nucleus of the vagus, right | 9547      | 9545      | R | 1058BD | 3 | 3 | 0 | 0 | 0 | 0 |
| EL   | N/A   | endolemniscal nucleus                    | 9548      | 9512      |   | 125ABF | 0 | 0 | 0 | 0 | 0 | 0 |
| EL   | N/A   | endolemniscal nucleus, left              | 9549      | 9548      | L | 125ABF | 0 | 0 | 0 | 0 | 0 | 0 |
| EL   | N/A   | endolemniscal nucleus, right             | 9550      | 9548      | R | 125ABF | 0 | 0 | 0 | 0 | 0 | 0 |

|      |     |                                                     |           |           |   |        |   |   |   |   |   |   |
|------|-----|-----------------------------------------------------|-----------|-----------|---|--------|---|---|---|---|---|---|
| EF   | N/A | epifascicular nucleus                               | 9551      | 9512      |   | 145CC1 | 0 | 0 | 0 | 0 | 0 | 0 |
| EF   | N/A | epifascicular nucleus, left                         | 9552      | 9551      | L | 145CC1 | 0 | 0 | 0 | 0 | 0 | 0 |
| EF   | N/A | epifascicular nucleus, right                        | 9553      | 9551      | R | 145CC1 | 0 | 0 | 0 | 0 | 0 | 0 |
| ECu  | N/A | external (accessory/lateral) cuneate nucleus        | 265504926 | 9512      |   | 145CC2 | 0 | 0 | 0 | 0 | 0 | 0 |
| ECu  | N/A | external (accessory/lateral) cuneate nucleus, left  | 265504930 | 265504926 | L | 145CC2 | 0 | 0 | 0 | 0 | 0 | 0 |
| ECu  | N/A | external (accessory/lateral) cuneate nucleus, right | 265504934 | 265504926 | R | 145CC2 | 0 | 0 | 0 | 0 | 0 | 0 |
| Gr   | N/A | gracile nucleus                                     | 9554      | 9512      |   | 165EC3 | 0 | 0 | 0 | 0 | 0 | 0 |
| Gr   | Gr  | gracile nucleus, left                               | 9555      | 9554      | L | 165EC3 | 1 | 1 | 0 | 1 | 0 | 0 |
| Gr   | Gr  | gracile nucleus, right                              | 9556      | 9554      | R | 165EC3 | 3 | 3 | 0 | 0 | 0 | 0 |
| 12   | N/A | hypoglossal nucleus                                 | 9557      | 9512      |   | 1860C5 | 0 | 0 | 0 | 0 | 0 | 0 |
| 12   | 12  | hypoglossal nucleus, left                           | 9558      | 9557      | L | 1860C5 | 2 | 3 | 0 | 0 | 3 | 1 |
| 12   | 12  | hypoglossal nucleus, right                          | 9559      | 9557      | R | 1860C5 | 3 | 3 | 0 | 0 | 0 | 0 |
| *IO  | N/A | inferior olivary complex                            | 9560      | 9512      |   | 1961C6 | 0 | 0 | 0 | 0 | 0 | 0 |
| *IO  | *IO | inferior olivary complex, left                      | 9561      | 9560      | L | 1961C6 | 3 | 4 | 2 | 6 | 4 | 2 |
| DIO  | N/A | dorsal accessory inferior olivary nucleus, left     | 9562      | 9561      | L | 1961C6 | 0 | 0 | 0 | 0 | 0 | 0 |
| MIO  | N/A | medial accessory inferior olivary nucleus, left     | 9563      | 9561      | L | 1961C6 | 0 | 0 | 0 | 0 | 0 | 0 |
| PrIO | N/A | principal inferior olivary nucleus, left            | 9564      | 9561      | L | 1961C6 | 0 | 0 | 0 | 0 | 0 | 0 |
| BIO  | N/A | beta inferior olivary nucleus, left                 | 265504938 | 9561      | L | 1961C6 | 0 | 0 | 0 | 0 | 0 | 0 |
| *IO  | *IO | inferior olivary complex, right                     | 9565      | 9560      | R | 1961C6 | 3 | 5 | 0 | 0 | 0 | 0 |
| DIO  | N/A | dorsal accessory inferior olivary nucleus, right    | 9566      | 9565      | R | 1961C6 | 0 | 0 | 0 | 0 | 0 | 0 |
| MIO  | N/A | medial accessory inferior olivary nucleus, right    | 9567      | 9565      | R | 1961C6 | 0 | 0 | 0 | 0 | 0 | 0 |
| PrIO | N/A | principal inferior olivary nucleus, right           | 9568      | 9565      | R | 1961C6 | 0 | 0 | 0 | 0 | 0 | 0 |
| BIO  | N/A | beta inferior olivary nucleus, right                | 265504942 | 9565      | R | 1961C6 | 0 | 0 | 0 | 0 | 0 | 0 |
| IS   | N/A | inferior salivatory nucleus                         | 9569      | 9512      |   | 1B63C8 | 0 | 0 | 0 | 0 | 0 | 0 |
| IS   | N/A | inferior salivatory nucleus, left                   | 9570      | 9569      | L | 1B63C8 | 0 | 0 | 0 | 0 | 0 | 0 |
| IS   | N/A | inferior salivatory nucleus, right                  | 9571      | 9569      | R | 1B63C8 | 0 | 0 | 0 | 0 | 0 | 0 |
| In   | N/A | intercalated nucleus                                | 9572      | 9512      |   | 1D65CA | 0 | 0 | 0 | 0 | 0 | 0 |
| In   | N/A | intercalated nucleus, left                          | 9573      | 9572      | L | 1D65CA | 0 | 0 | 0 | 0 | 0 | 0 |
| In   | N/A | intercalated nucleus, right                         | 9574      | 9572      | R | 1D65CA | 0 | 0 | 0 | 0 | 0 | 0 |
| IFH  | N/A | interfascicular hypoglossal nucleus                 | 9575      | 9512      |   | 1F67CC | 0 | 0 | 0 | 0 | 0 | 0 |
| IFH  | N/A | interfascicular hypoglossal nucleus, left           | 9576      | 9575      | L | 1F67CC | 0 | 0 | 0 | 0 | 0 | 0 |
| IFH  | N/A | interfascicular hypoglossal nucleus, right          | 9577      | 9575      | R | 1F67CC | 0 | 0 | 0 | 0 | 0 | 0 |
| IPo  | N/A | interpositus nucleus                                | 9578      | 9512      |   | 2169CE | 0 | 0 | 0 | 0 | 0 | 0 |

|       |       |                                                 |      |      |   |        |   |   |   |   |   |   |
|-------|-------|-------------------------------------------------|------|------|---|--------|---|---|---|---|---|---|
| IPo   | N/A   | interpositus nucleus, left                      | 9579 | 9578 | L | 2169CE | 0 | 0 | 0 | 0 | 0 | 0 |
| IPo   | N/A   | interpositus nucleus, right                     | 9580 | 9578 | R | 2169CE | 0 | 0 | 0 | 0 | 0 | 0 |
| LPCu  | N/A   | lateral pericuneate nucleus                     | 9581 | 9512 |   | 236BD0 | 0 | 0 | 0 | 0 | 0 | 0 |
| LPCu  | N/A   | lateral pericuneate nucleus, left               | 9582 | 9581 | L | 236BD0 | 0 | 0 | 0 | 0 | 0 | 0 |
| LPCu  | N/A   | lateral pericuneate nucleus, right              | 9583 | 9581 | R | 236BD0 | 0 | 0 | 0 | 0 | 0 | 0 |
| MPCu  | N/A   | medial pericuneate nucleus                      | 9584 | 9512 |   | 256DD2 | 0 | 0 | 0 | 0 | 0 | 0 |
| MPCu  | N/A   | medial pericuneate nucleus, left                | 9585 | 9584 | L | 256DD2 | 0 | 0 | 0 | 0 | 0 | 0 |
| MPCu  | N/A   | medial pericuneate nucleus, right               | 9586 | 9584 | R | 256DD2 | 0 | 0 | 0 | 0 | 0 | 0 |
| MeRF  | N/A   | medullary reticular formation                   | 9587 | 9512 |   | 276FD4 | 0 | 0 | 0 | 0 | 0 | 0 |
| CMRt  | N/A   | central medullary reticular group               | 9588 | 9587 |   | 276FD4 | 0 | 0 | 0 | 0 | 0 | 0 |
| CMRt  | CMRt  | central medullary reticular group, left         | 9589 | 9588 | L | 276FD4 | 3 | 3 | 0 | 2 | 1 | 0 |
| CRt   | N/A   | central reticular nucleus of the medulla, left  | 9590 | 9589 | L | 276FD4 | 0 | 0 | 0 | 0 | 0 | 0 |
| MRt   | N/A   | medial reticular nucleus of the medulla, left   | 9591 | 9589 | L | 276FD4 | 0 | 0 | 0 | 0 | 0 | 0 |
| VRt   | N/A   | ventral reticular nucleus of the medulla, left  | 9592 | 9589 | L | 276FD4 | 0 | 0 | 0 | 0 | 0 | 0 |
| Irt   | N/A   | intermediate zone, left                         | 9611 | 9589 | L | 276FD4 | 0 | 0 | 0 | 0 | 0 | 0 |
| CMRt  | CMRt  | central medullary reticular group, right        | 9593 | 9588 | R | 276FD4 | 3 | 3 | 0 | 0 | 0 | 0 |
| CRt   | N/A   | central reticular nucleus of the medulla, right | 9594 | 9593 | R | 276FD4 | 0 | 0 | 0 | 0 | 0 | 0 |
| MRt   | N/A   | medial reticular nucleus of the medulla, right  | 9595 | 9593 | R | 276FD4 | 0 | 0 | 0 | 0 | 0 | 0 |
| VRt   | N/A   | ventral reticular nucleus of the medulla, right | 9596 | 9593 | R | 276FD4 | 0 | 0 | 0 | 0 | 0 | 0 |
| Irt   | N/A   | intermediate zone, right                        | 9612 | 9593 | R | 276FD4 | 0 | 0 | 0 | 0 | 0 | 0 |
| *GiRt | N/A   | gigantocellular group                           | 9597 | 9587 |   | 276FD4 | 0 | 0 | 0 | 0 | 0 | 0 |
| *GiRt | *GiRt | gigantocellular group, left                     | 9598 | 9597 | L | 276FD4 | 2 | 4 | 2 | 5 | 3 | 3 |
| DPGi  | N/A   | dorsal paragigantocellular nucleus, left        | 9600 | 9598 | L | 276FD4 | 0 | 0 | 0 | 0 | 0 | 0 |
| LPGi  | N/A   | lateral paragigantocellular nucleus, left       | 9601 | 9598 | L | 276FD4 | 0 | 0 | 0 | 0 | 0 | 0 |
| Gi    | N/A   | gigantocellular nucleus, left                   | 9602 | 9598 | L | 276FD4 | 0 | 0 | 0 | 0 | 0 | 0 |
| GiV   | N/A   | gigantocellular nucleus, ventral part, left     | 9603 | 9598 | L | 276FD4 | 0 | 0 | 0 | 0 | 0 | 0 |
| Gia   | N/A   | paragigantocellular nucleus, alpha part, left   | 9599 | 9598 | L | 276FD4 | 0 | 0 | 0 | 0 | 0 | 0 |
| *GiRt | *GiRt | gigantocellular group, right                    | 9604 | 9597 | R | 276FD4 | 1 | 4 | 0 | 0 | 0 | 0 |
| DPGi  | N/A   | dorsal paragigantocellular nucleus, right       | 9606 | 9604 | R | 276FD4 | 0 | 0 | 0 | 0 | 0 | 0 |
| LPGi  | N/A   | lateral paragigantocellular nucleus, right      | 9607 | 9604 | R | 276FD4 | 0 | 0 | 0 | 0 | 0 | 0 |
| Gi    | N/A   | gigantocellular nucleus, right                  | 9608 | 9604 | R | 276FD4 | 0 | 0 | 0 | 0 | 0 | 0 |
| GiV   | N/A   | gigantocellular nucleus, ventral part, right    | 9609 | 9604 | R | 276FD4 | 0 | 0 | 0 | 0 | 0 | 0 |
| Gia   | N/A   | paragigantocellular nucleus, alpha part, right  | 9605 | 9604 | R | 276FD4 | 0 | 0 | 0 | 0 | 0 | 0 |
| *LMRt | N/A   | lateral medullary reticular group               | 9613 | 9587 |   | 276FD4 | 0 | 0 | 0 | 0 | 0 | 0 |
| *LMRt | *LMRt | lateral medullary reticular group, left         | 9614 | 9613 | L | 276FD4 | 2 | 3 | 1 | 3 | 3 | 1 |
| EO    | N/A   | epiolivary nucleus, left                        | 9615 | 9614 | L | 276FD4 | 0 | 0 | 0 | 0 | 0 | 0 |

|       |       |                                          |           |           |   |        |   |   |   |   |   |   |
|-------|-------|------------------------------------------|-----------|-----------|---|--------|---|---|---|---|---|---|
| LRt   | N/A   | lateral reticular nucleus, left          | 9616      | 9614      | L | 276FD4 | 0 | 0 | 0 | 0 | 0 | 0 |
| LRtPC | N/A   | parvocellular division, left             | 9618      | 9614      | L | 276FD4 | 0 | 0 | 0 | 0 | 0 | 0 |
| LRtS5 | N/A   | subtrigeminal division, left             | 9617      | 9614      | L | 276FD4 | 0 | 0 | 0 | 0 | 0 | 0 |
| *LMRt | *LMRt | lateral medullary reticular group, right | 9619      | 9613      | R | 276FD4 | 4 | 3 | 0 | 0 | 0 | 0 |
| EO    | N/A   | epiolivary nucleus, right                | 9620      | 9619      | R | 276FD4 | 0 | 0 | 0 | 0 | 0 | 0 |
| LRt   | N/A   | lateral reticular nucleus, right         | 9621      | 9619      | R | 276FD4 | 0 | 0 | 0 | 0 | 0 | 0 |
| LRtPC | N/A   | parvocellular division, right            | 9623      | 9619      | R | 276FD4 | 0 | 0 | 0 | 0 | 0 | 0 |
| LRtS5 | N/A   | subtrigeminal division, right            | 9622      | 9619      | R | 276FD4 | 0 | 0 | 0 | 0 | 0 | 0 |
| PCRt  | N/A   | parvicellular reticular nucleus          | 9624      | 9587      |   | 276FD4 | 0 | 0 | 0 | 0 | 0 | 0 |
| PCRt  | N/A   | parvicellular reticular nucleus, left    | 9625      | 9624      | L | 276FD4 | 0 | 0 | 0 | 0 | 0 | 0 |
| PCRt  | N/A   | parvicellular reticular nucleus, right   | 9626      | 9624      | R | 276FD4 | 0 | 0 | 0 | 0 | 0 | 0 |
| Ro    | N/A   | nucleus of Roller                        | 9627      | 9512      |   | 2870D5 | 0 | 0 | 0 | 0 | 0 | 0 |
| Ro    | N/A   | nucleus of Roller, left                  | 9628      | 9627      | L | 2870D5 | 0 | 0 | 0 | 0 | 0 | 0 |
| Ro    | N/A   | nucleus of Roller, right                 | 9629      | 9627      | R | 2870D5 | 0 | 0 | 0 | 0 | 0 | 0 |
| Pa5   | N/A   | paratrigeminal nucleus                   | 9630      | 9512      |   | 2A72D7 | 0 | 0 | 0 | 0 | 0 | 0 |
| Pa5   | N/A   | paratrigeminal nucleus, left             | 9631      | 9630      | L | 2A72D7 | 0 | 0 | 0 | 0 | 0 | 0 |
| Pa5   | N/A   | paratrigeminal nucleus, right            | 9632      | 9630      | R | 2A72D7 | 0 | 0 | 0 | 0 | 0 | 0 |
| Pe5   | N/A   | peritrigeminal nucleus                   | 9633      | 9512      |   | 2C74D9 | 0 | 0 | 0 | 0 | 0 | 0 |
| Pe5   | N/A   | peritrigeminal nucleus, left             | 9634      | 9633      | L | 2C74D9 | 0 | 0 | 0 | 0 | 0 | 0 |
| Pe5   | N/A   | peritrigeminal nucleus, right            | 9635      | 9633      | R | 2C74D9 | 0 | 0 | 0 | 0 | 0 | 0 |
| PnB   | N/A   | pontobulbar nucleus                      | 9636      | 9512      |   | 2E76DB | 0 | 0 | 0 | 0 | 0 | 0 |
| PnB   | N/A   | pontobulbar nucleus, left                | 9637      | 9636      | L | 2E76DB | 0 | 0 | 0 | 0 | 0 | 0 |
| PnB   | N/A   | pontobulbar nucleus, right               | 9638      | 9636      | R | 2E76DB | 0 | 0 | 0 | 0 | 0 | 0 |
| Pr    | N/A   | prepositus nucleus                       | 9639      | 9512      |   | 3078DD | 0 | 0 | 0 | 0 | 0 | 0 |
| Pr    | N/A   | prepositus nucleus, left                 | 9640      | 9639      | L | 3078DD | 0 | 0 | 0 | 0 | 0 | 0 |
| Pr    | N/A   | prepositus nucleus, right                | 9641      | 9639      | R | 3078DD | 0 | 0 | 0 | 0 | 0 | 0 |
| *RaM  | *RaM  | raphe nuclei of medulla                  | 9642      | 9512      |   | 327ADF | 2 | 4 | 2 | 4 | 2 | 2 |
| RMg   | N/A   | nucleus raphe magnus                     | 9643      | 9642      |   | 327ADF | 0 | 0 | 0 | 0 | 0 | 0 |
| RMg   | N/A   | nucleus raphe magnus, left               | 9644      | 9643      | L | 327ADF | 0 | 0 | 0 | 0 | 0 | 0 |
| RMg   | N/A   | nucleus raphe magnus, right              | 9645      | 9643      | R | 327ADF | 0 | 0 | 0 | 0 | 0 | 0 |
| ROb   | N/A   | nucleus raphe obscurus                   | 9646      | 9642      |   | 327ADF | 0 | 0 | 0 | 0 | 0 | 0 |
| ROb   | N/A   | nucleus raphe obscurus, left             | 9647      | 9646      | L | 327ADF | 0 | 0 | 0 | 0 | 0 | 0 |
| ROb   | N/A   | nucleus raphe obscurus, right            | 9648      | 9646      | R | 327ADF | 0 | 0 | 0 | 0 | 0 | 0 |
| RPa   | N/A   | nucleus raphe pallidus                   | 9649      | 9642      |   | 327ADF | 0 | 0 | 0 | 0 | 0 | 0 |
| RPRa  | N/A   | nucleus pararaphales                     | 265504950 | 9642      |   | 327AE0 | 0 | 0 | 0 | 0 | 0 | 0 |
| RPRa  | N/A   | nucleus pararaphales, left               | 265504954 | 265504950 | L | 327AE0 | 0 | 0 | 0 | 0 | 0 | 0 |
| RPRa  | N/A   | nucleus pararaphales, right              | 265504958 | 265504950 | R | 327AE0 | 0 | 0 | 0 | 0 | 0 | 0 |
| Ramb  | N/A   | retroambiguus nucleus                    | 9650      | 9512      |   | 347CE1 | 0 | 0 | 0 | 0 | 0 | 0 |
| Ramb  | N/A   | retroambiguus nucleus, left              | 9651      | 9650      | L | 347CE1 | 0 | 0 | 0 | 0 | 0 | 0 |
| Ramb  | N/A   | retroambiguus nucleus, right             | 9652      | 9650      | R | 347CE1 | 0 | 0 | 0 | 0 | 0 | 0 |

|        |      |                                                         |      |      |   |        |   |   |   |   |   |   |
|--------|------|---------------------------------------------------------|------|------|---|--------|---|---|---|---|---|---|
| Sol    | N/A  | solitary nucleus                                        | 9653 | 9512 |   | 367EE3 | 0 | 0 | 0 | 0 | 0 | 0 |
| Sol    | N/A  | solitary nucleus, left                                  | 9654 | 9653 | L | 367EE3 | 0 | 0 | 0 | 0 | 0 | 0 |
| SolC   | N/A  | solitary nucleus, left, commissural subnucleus          | 9655 | 9654 | L | 367EE3 | 0 | 0 | 0 | 0 | 0 | 0 |
| SolD   | N/A  | solitary nucleus, left, dorsal subnucleus               | 9656 | 9654 | L | 367EE3 | 0 | 0 | 0 | 0 | 0 | 0 |
| SolDL  | N/A  | solitary nucleus, left, dorsolateral subnucleus         | 9657 | 9654 | L | 367EE3 | 0 | 0 | 0 | 0 | 0 | 0 |
| SolG   | N/A  | solitary nucleus, left, gelatinosus subnucleus          | 9658 | 9654 | L | 367EE3 | 0 | 0 | 0 | 0 | 0 | 0 |
| SolI   | N/A  | solitary nucleus, left, interstitial subnucleus         | 9659 | 9654 | L | 367EE3 | 0 | 0 | 0 | 0 | 0 | 0 |
| SolIM  | N/A  | solitary nucleus, left, intermediate subnucleus         | 9660 | 9654 | L | 367EE3 | 0 | 0 | 0 | 0 | 0 | 0 |
| SolM   | N/A  | solitary nucleus, left, meidal subnucleus               | 9661 | 9654 | L | 367EE3 | 0 | 0 | 0 | 0 | 0 | 0 |
| SolPaC | N/A  | solitary nucleus, left, paracommissural part            | 9662 | 9654 | L | 367EE3 | 0 | 0 | 0 | 0 | 0 | 0 |
| SolV   | N/A  | solitary nucleus, left, ventral subnucleus              | 9663 | 9654 | L | 367EE3 | 0 | 0 | 0 | 0 | 0 | 0 |
| SolVL  | N/A  | ventrolateral subnucleus of solitary tract, left        | 9664 | 9654 | L | 367EE3 | 0 | 0 | 0 | 0 | 0 | 0 |
| Sol    | N/A  | solitary nucleus, right                                 | 9665 | 9653 | R | 367EE3 | 0 | 0 | 0 | 0 | 0 | 0 |
| SolC   | N/A  | solitary nucleus, right, commissural subnucleus         | 9666 | 9665 | R | 367EE3 | 0 | 0 | 0 | 0 | 0 | 0 |
| SolD   | N/A  | solitary nucleus, right, dorsal subnucleus              | 9667 | 9665 | R | 367EE3 | 0 | 0 | 0 | 0 | 0 | 0 |
| SolDL  | N/A  | solitary nucleus, right, dorsolateral subnucleus        | 9668 | 9665 | R | 367EE3 | 0 | 0 | 0 | 0 | 0 | 0 |
| SolG   | N/A  | solitary nucleus, right, gelatinosus subnucleus         | 9669 | 9665 | R | 367EE3 | 0 | 0 | 0 | 0 | 0 | 0 |
| SolI   | N/A  | solitary nucleus, right, interstitial subnucleus        | 9670 | 9665 | R | 367EE3 | 0 | 0 | 0 | 0 | 0 | 0 |
| SolIM  | N/A  | solitary nucleus, right, intermediate subnucleus        | 9671 | 9665 | R | 367EE3 | 0 | 0 | 0 | 0 | 0 | 0 |
| SolM   | N/A  | solitary nucleus, right, meidal subnucleus              | 9672 | 9665 | R | 367EE3 | 0 | 0 | 0 | 0 | 0 | 0 |
| SolPaC | N/A  | solitary nucleus, right, paracommissural part           | 9673 | 9665 | R | 367EE3 | 0 | 0 | 0 | 0 | 0 | 0 |
| SolV   | N/A  | solitary nucleus, right, ventral subnucleus             | 9674 | 9665 | R | 367EE3 | 0 | 0 | 0 | 0 | 0 | 0 |
| SolVL  | N/A  | ventrolateral subnucleus of solitary tract, right       | 9675 | 9665 | R | 367EE3 | 0 | 0 | 0 | 0 | 0 | 0 |
| *Sp5   | N/A  | spinal trigeminal nucleus                               | 9676 | 9512 |   | 377FE4 | 0 | 0 | 0 | 0 | 0 | 0 |
| *Sp5   | *Sp5 | spinal trigeminal nucleus, left                         | 9677 | 9676 | L | 377FE4 | 8 | 5 | 4 | 8 | 6 | 4 |
| Sp5C   | N/A  | caudal spinal trigeminal nucleus, left                  | 9680 | 9677 | L | 377FE4 | 0 | 0 | 0 | 0 | 0 | 0 |
| Sp5Cg  | N/A  | caudal spinal trigeminal nucleus, left, gelatinous part | 9681 | 9680 | L | 377FE4 | 0 | 0 | 0 | 0 | 0 | 0 |

|        |      |                                                             |      |      |   |          |   |   |   |   |   |   |
|--------|------|-------------------------------------------------------------|------|------|---|----------|---|---|---|---|---|---|
| SP5Cm  | N/A  | caudal spinal trigeminal nucleus, left, magnocellular part  | 9682 | 9680 | L | 377FE4   | 0 | 0 | 0 | 0 | 0 | 0 |
| SP5Cz  | N/A  | caudal spinal trigeminal nucleus, left, zonal part          | 9683 | 9680 | L | 377FE4   | 0 | 0 | 0 | 0 | 0 | 0 |
| Sp5l   | N/A  | interpolar part of spinal trigeminal nucleus, left          | 9678 | 9677 | L | 377FE4   | 0 | 0 | 0 | 0 | 0 | 0 |
| Sp5O   | N/A  | oral part of spinal trigeminal nucleus, left                | 9679 | 9677 | L | 377FE4   | 0 | 0 | 0 | 0 | 0 | 0 |
| *Sp5   | *Sp5 | spinal trigeminal nucleus, right                            | 9684 | 9676 | R | 377FE4   | 6 | 6 | 0 | 0 | 0 | 0 |
| Sp5C   | N/A  | caudal spinal trigeminal nucleus, right                     | 9687 | 9684 | R | 377FE4   | 0 | 0 | 0 | 0 | 0 | 0 |
| Sp5Cg  | N/A  | caudal spinal trigeminal nucleus, right, gelatenous part    | 9688 | 9687 | R | 377FE4   | 0 | 0 | 0 | 0 | 0 | 0 |
| SP5Cm  | N/A  | caudal spinal trigeminal nucleus, right, magnocellular part | 9689 | 9687 | R | 377FE4   | 0 | 0 | 0 | 0 | 0 | 0 |
| SP5Cz  | N/A  | caudal spinal trigeminal nucleus, right, zonal part         | 9690 | 9687 | R | 377FE4   | 0 | 0 | 0 | 0 | 0 | 0 |
| Sp5l   | N/A  | interpolar part of spinal trigeminal nucleus, right         | 9685 | 9684 | R | 377FE4   | 0 | 0 | 0 | 0 | 0 | 0 |
| Sp5O   | N/A  | oral part of spinal trigeminal nucleus, right               | 9686 | 9684 | R | 377FE4   | 0 | 0 | 0 | 0 | 0 | 0 |
| Sge    | N/A  | suprageniculate nucleus of the medulla                      | 9691 | 9512 |   | 3.98E+09 | 0 | 0 | 0 | 0 | 0 | 0 |
| Sge    | N/A  | suprageniculate nucleus of the medulla, left                | 9692 | 9691 | L | 3.98E+09 | 0 | 0 | 0 | 0 | 0 | 0 |
| Sge    | N/A  | suprageniculate nucleus of the medulla, right               | 9693 | 9691 | R | 3.98E+09 | 0 | 0 | 0 | 0 | 0 | 0 |
| SSp    | N/A  | supraspinal nucleus                                         | 9694 | 9512 |   | 3B83E8   | 0 | 0 | 0 | 0 | 0 | 0 |
| SSp    | N/A  | supraspinal nucleus, left                                   | 9695 | 9694 | L | 3B83E8   | 0 | 0 | 0 | 0 | 0 | 0 |
| SSp    | N/A  | supraspinal nucleus, right                                  | 9696 | 9694 | R | 3B83E8   | 0 | 0 | 0 | 0 | 0 | 0 |
| *8Ve   | N/A  | vestibular nuclei                                           | 9697 | 9512 |   | 3D85EA   | 0 | 0 | 0 | 0 | 0 | 0 |
| *8Ve   | *8Ve | vestibular nuclei, left                                     | 9698 | 9697 | L | 3D85EA   | 2 | 4 | 2 | 4 | 3 | 3 |
| LVe    | N/A  | lateral vestibular nucleus, left                            | 9699 | 9698 | L | 3D85EA   | 0 | 0 | 0 | 0 | 0 | 0 |
| MVe    | N/A  | medial vestibular nucleus, left                             | 9700 | 9698 | L | 3D85EA   | 0 | 0 | 0 | 0 | 0 | 0 |
| SpVe   | N/A  | spinal vestibular nucleus, left                             | 9702 | 9698 | L | 3D85EA   | 0 | 0 | 0 | 0 | 0 | 0 |
| SuVe   | N/A  | superior vestibular nucleus, left                           | 9701 | 9698 | L | 3D85EA   | 0 | 0 | 0 | 0 | 0 | 0 |
| *8Ve   | *8Ve | vestibular nuclei, right                                    | 9703 | 9697 | R | 3D85EA   | 3 | 4 | 0 | 0 | 0 | 0 |
| LVe    | N/A  | lateral vestibular nucleus, right                           | 9704 | 9703 | R | 3D85EA   | 0 | 0 | 0 | 0 | 0 | 0 |
| MVe    | N/A  | medial vestibular nucleus, right                            | 9705 | 9703 | R | 3D85EA   | 0 | 0 | 0 | 0 | 0 | 0 |
| SpVe   | N/A  | spinal vestibular nucleus, right                            | 9707 | 9703 | R | 3D85EA   | 0 | 0 | 0 | 0 | 0 | 0 |
| SuVe   | N/A  | superior vestibular nucleus, right                          | 9706 | 9703 | R | 3D85EA   | 0 | 0 | 0 | 0 | 0 | 0 |
| WM     | N/A  | white matter                                                | 9218 | 4005 |   | F2F1F0   | 0 | 0 | 0 | 0 | 0 | 0 |
| TELWM  | N/A  | telencephalic white matter                                  | 9219 | 9218 |   | F2F1F0   | 0 | 0 | 0 | 0 | 0 | 0 |
| TELCom | N/A  | telencephalic commissures                                   | 9220 | 9219 |   | F2F1F0   | 0 | 0 | 0 | 0 | 0 | 0 |
| ac     | N/A  | anterior commissure                                         | 9221 | 9220 |   | F2F1F0   | 0 | 0 | 0 | 0 | 0 | 0 |



|       |     |                                   |           |           |   |        |   |   |   |   |   |   |
|-------|-----|-----------------------------------|-----------|-----------|---|--------|---|---|---|---|---|---|
| *cc   | *cc | corpus callosum                   | 9222      | 9220      |   | F2F1F0 | 2 | 1 | 4 | 1 | 2 | 3 |
| bcc   | N/A | body of the corpus callosum       | 9224      | 9222      |   | F2F1F0 | 0 | 0 | 0 | 0 | 0 | 0 |
| gcc   | N/A | genu of the corpus callosum       | 9223      | 9222      |   | F2F1F0 | 0 | 0 | 0 | 0 | 0 | 0 |
| rcc   | N/A | rostrum of the corpus callosum    | 9226      | 9222      |   | F2F1F0 | 0 | 0 | 0 | 0 | 0 | 0 |
| scc   | N/A | splenium of the corpus callosum   | 9225      | 9222      |   | F2F1F0 | 0 | 0 | 0 | 0 | 0 | 0 |
| rdcc  | N/A | radiations of corpus callosum     | 265504962 | 9222      |   | F2F1F0 | 0 | 0 | 0 | 0 | 0 | 0 |
| tap   | N/A | tapetum of corpus callosum        | 265504966 | 9222      |   | F2F1F0 | 0 | 0 | 0 | 0 | 0 | 0 |
| hbc   | N/A | habenular commissure              | 9227      | 9220      |   | F2F1F0 | 0 | 0 | 0 | 0 | 0 | 0 |
| hc    | N/A | hippocampal commissure            | 9228      | 9220      |   | F2F1F0 | 0 | 0 | 0 | 0 | 0 | 0 |
| pc    | N/A | posterior commissure              | 9229      | 9220      |   | F2F1F0 | 0 | 0 | 0 | 0 | 0 | 0 |
| smc   | N/A | supramamillary commissure         | 265504970 | 9220      |   | F2F1F0 | 0 | 0 | 0 | 0 | 0 | 0 |
| TeITr | N/A | telencephalic white matter tracts | 9230      | 9219      |   | F2F1F0 | 0 | 0 | 0 | 0 | 0 | 0 |
| ar    | N/A | acoustic radiation                | 265504974 | 9230      |   | F2F1F0 | 0 | 0 | 0 | 0 | 0 | 0 |
| ar    | N/A | acoustic radiation                | 265504978 | 265504974 | L | F2F1F0 | 0 | 0 | 0 | 0 | 0 | 0 |
| ar    | N/A | acoustic radiation                | 265504982 | 265504974 | R | F2F1F0 | 0 | 0 | 0 | 0 | 0 | 0 |
| arf   | N/A | arcuate fasciculus                | 9231      | 9230      |   | F2F1F0 | 0 | 0 | 0 | 0 | 0 | 0 |
| arf   | N/A | arcuate fasciculus, left          | 9232      | 9231      | L | F2F1F0 | 0 | 0 | 0 | 0 | 0 | 0 |
| arf   | N/A | arcuate fasciculus, right         | 9233      | 9231      | R | F2F1F0 | 0 | 0 | 0 | 0 | 0 | 0 |
| alv   | N/A | alveus                            | 9234      | 9230      |   | F2F1F0 | 0 | 0 | 0 | 0 | 0 | 0 |
| alv   | N/A | alveus, left                      | 9235      | 9234      | L | F2F1F0 | 0 | 0 | 0 | 0 | 0 | 0 |
| alv   | N/A | alveus, right                     | 9236      | 9234      | R | F2F1F0 | 0 | 0 | 0 | 0 | 0 | 0 |
| amtg  | N/A | amygdalotegmental tract           | 265504986 | 9230      |   | F2F1F0 | 0 | 0 | 0 | 0 | 0 | 0 |
| amtg  | N/A | amygdalotegmental tract, left     | 265504990 | 265504986 | L | F2F1F0 | 0 | 0 | 0 | 0 | 0 | 0 |
| amtg  | N/A | amygdalotegmental tract, right    | 265504994 | 265504986 | R | F2F1F0 | 0 | 0 | 0 | 0 | 0 | 0 |
| agb   | N/A | angular bundle                    | 265504998 | 9230      |   | F2F1F0 | 0 | 0 | 0 | 0 | 0 | 0 |
| agb   | N/A | angular bundle, left              | 265505002 | 265504998 | L | F2F1F0 | 0 | 0 | 0 | 0 | 0 | 0 |
| agb   | N/A | angular bundle, right             | 265505006 | 265504998 | R | F2F1F0 | 0 | 0 | 0 | 0 | 0 | 0 |
| al    | N/A | ansa lenticularis                 | 9237      | 9230      |   | F2F1F0 | 0 | 0 | 0 | 0 | 0 | 0 |
| al    | N/A | ansa lenticularis, left           | 9238      | 9237      | L | F2F1F0 | 0 | 0 | 0 | 0 | 0 | 0 |
| al    | N/A | ansa lenticularis, right          | 9239      | 9237      | R | F2F1F0 | 0 | 0 | 0 | 0 | 0 | 0 |
| ap    | N/A | ansa peduncularis                 | 265505010 | 9230      |   | F2F1F0 | 0 | 0 | 0 | 0 | 0 | 0 |
| ap    | N/A | ansa peduncularis, left           | 265505014 | 265505010 | L | F2F1F0 | 0 | 0 | 0 | 0 | 0 | 0 |
| ap    | N/A | ansa peduncularis, right          | 265505018 | 265505010 | R | F2F1F0 | 0 | 0 | 0 | 0 | 0 | 0 |
| bx    | N/A | bundle X                          | 265505022 | 9230      |   | F2F1F0 | 0 | 0 | 0 | 0 | 0 | 0 |
| bx    | N/A | bundle X, left                    | 265505026 | 265505022 | L | F2F1F0 | 0 | 0 | 0 | 0 | 0 | 0 |
| bx    | N/A | bundle X, right                   | 265505030 | 265505022 | R | F2F1F0 | 0 | 0 | 0 | 0 | 0 | 0 |
| cgb   | N/A | cingulum bundle                   | 9240      | 9230      |   | F2F1F0 | 0 | 0 | 0 | 0 | 0 | 0 |
| cgb   | cgb | cingulum bundle, left             | 9241      | 9240      | L | F2F1F0 | 1 | 0 | 0 | 0 | 0 | 0 |
| cgb   | cgb | cingulum bundle, right            | 9242      | 9240      | R | F2F1F0 | 1 | 0 | 0 | 0 | 0 | 0 |
| comb  | N/A | comb fibers                       | 265505034 | 9230      |   | F2F1F0 | 0 | 0 | 0 | 0 | 0 | 0 |

|        |     |                                                     |           |           |   |        |   |   |   |   |   |   |
|--------|-----|-----------------------------------------------------|-----------|-----------|---|--------|---|---|---|---|---|---|
| comb   | N/A | comb fibers, left                                   | 265505038 | 265505034 | L | F2F1F0 | 0 | 0 | 0 | 0 | 0 | 0 |
| comb   | N/A | comb fibers, right                                  | 265505042 | 265505034 | R | F2F1F0 | 0 | 0 | 0 | 0 | 0 | 0 |
| cor    | N/A | corona radiata                                      | 265505046 | 9230      |   | F2F1F0 | 0 | 0 | 0 | 0 | 0 | 0 |
| cor    | N/A | corona radiata, left                                | 265505050 | 265505046 | L | F2F1F0 | 0 | 0 | 0 | 0 | 0 | 0 |
| cor    | N/A | corona radiata, right                               | 265505054 | 265505046 | R | F2F1F0 | 0 | 0 | 0 | 0 | 0 | 0 |
| cbu    | N/A | corticobulbar tract                                 | 265505058 | 9230      |   | F2F1F0 | 0 | 0 | 0 | 0 | 0 | 0 |
| cbu-sc | N/A | corticobulbar tract, supracapsular part             | 265505062 | 265505058 |   | F2F1F0 | 0 | 0 | 0 | 0 | 0 | 0 |
| cbu-sc | N/A | corticobulbar tract, supracapsular part, left       | 265505066 | 265505062 | L | F2F1F0 | 0 | 0 | 0 | 0 | 0 | 0 |
| cbu-sc | N/A | corticobulbar tract, supracapsular part, right      | 265505070 | 265505062 | R | F2F1F0 | 0 | 0 | 0 | 0 | 0 | 0 |
| cbu-ic | N/A | corticobulbar tract, infracapsular part             | 265505074 | 265505058 |   | F2F1F0 | 0 | 0 | 0 | 0 | 0 | 0 |
| cbu-ic | N/A | corticobulbar tract, infracapsular part, left       | 265505078 | 265505074 | L | F2F1F0 | 0 | 0 | 0 | 0 | 0 | 0 |
| cbu-ic | N/A | corticobulbar tract, infracapsular part, right      | 265505082 | 265505074 | R | F2F1F0 | 0 | 0 | 0 | 0 | 0 | 0 |
| ec     | N/A | external capsule                                    | 9243      | 9230      |   | F2F1F0 | 0 | 0 | 0 | 0 | 0 | 0 |
| ec     | N/A | external capsule, left                              | 9244      | 9243      | L | F2F1F0 | 0 | 0 | 0 | 0 | 0 | 0 |
| ec     | N/A | external capsule, right                             | 9245      | 9243      | R | F2F1F0 | 0 | 0 | 0 | 0 | 0 | 0 |
| emlgp  | N/A | external medullary lamina of globus pallidus        | 265505086 | 9230      |   | F2F1F0 | 0 | 0 | 0 | 0 | 0 | 0 |
| emlgp  | N/A | external medullary lamina of globus pallidus, left  | 265505090 | 265505086 | L | F2F1F0 | 0 | 0 | 0 | 0 | 0 | 0 |
| emlgp  | N/A | external medullary lamina of globus pallidus, right | 265505094 | 265505086 | R | F2F1F0 | 0 | 0 | 0 | 0 | 0 | 0 |
| emlth  | N/A | external medullary lamina of thalamus               | 265505098 | 9230      |   | F2F1F0 | 0 | 0 | 0 | 0 | 0 | 0 |
| emlth  | N/A | external medullary lamina of thalamus, left         | 265505102 | 265505098 | L | F2F1F0 | 0 | 0 | 0 | 0 | 0 | 0 |
| emlth  | N/A | external medullary lamina of thalamus, right        | 265505106 | 265505098 | R | F2F1F0 | 0 | 0 | 0 | 0 | 0 | 0 |
| exc    | N/A | extreme capsule                                     | 9246      | 9230      |   | F2F1F0 | 0 | 0 | 0 | 0 | 0 | 0 |
| exc    | N/A | extreme capsule, left                               | 9247      | 9246      | L | F2F1F0 | 0 | 0 | 0 | 0 | 0 | 0 |
| exc    | N/A | extreme capsule, right                              | 9248      | 9246      | R | F2F1F0 | 0 | 0 | 0 | 0 | 0 | 0 |
| fx     | N/A | fornix                                              | 9249      | 9230      |   | F2F1F0 | 0 | 0 | 0 | 0 | 0 | 0 |
| fx     | N/A | fornix, left                                        | 9250      | 9249      | L | F2F1F0 | 0 | 0 | 0 | 0 | 0 | 0 |
| afx    | N/A | anterior column of the fornix, left                 | 9251      | 9250      | L | F2F1F0 | 0 | 0 | 0 | 0 | 0 | 0 |
| bfx    | N/A | body of the fornix, left                            | 9252      | 9250      | L | F2F1F0 | 0 | 0 | 0 | 0 | 0 | 0 |
| fi     | N/A | fimbria, left                                       | 9253      | 9250      | L | F2F1F0 | 0 | 0 | 0 | 0 | 0 | 0 |
| pfx    | N/A | posterior column of the fornix, left                | 9254      | 9250      | L | F2F1F0 | 0 | 0 | 0 | 0 | 0 | 0 |
| fx     | N/A | fornix, right                                       | 9255      | 9249      | R | F2F1F0 | 0 | 0 | 0 | 0 | 0 | 0 |
| afx    | N/A | anterior column of the fornix, right                | 9256      | 9255      | R | F2F1F0 | 0 | 0 | 0 | 0 | 0 | 0 |
| bfx    | N/A | body of the fornix, right                           | 9257      | 9255      | R | F2F1F0 | 0 | 0 | 0 | 0 | 0 | 0 |
| fi     | N/A | fimbria, right                                      | 9258      | 9255      | R | F2F1F0 | 0 | 0 | 0 | 0 | 0 | 0 |
| pfx    | N/A | posterior column of the fornix, right               | 9259      | 9255      | R | F2F1F0 | 0 | 0 | 0 | 0 | 0 | 0 |

|       |     |                                                     |           |           |   |        |   |   |   |   |   |   |
|-------|-----|-----------------------------------------------------|-----------|-----------|---|--------|---|---|---|---|---|---|
| ilf   | N/A | inferior longitudinal fasciculus                    | 9260      | 9230      |   | F2F1F0 | 0 | 0 | 0 | 0 | 0 | 0 |
| ilf   | N/A | inferior longitudinal fasciculus, left              | 9261      | 9260      | L | F2F1F0 | 0 | 0 | 0 | 0 | 0 | 0 |
| ilf   | N/A | inferior longitudinal fasciculus, right             | 9262      | 9260      | R | F2F1F0 | 0 | 0 | 0 | 0 | 0 | 0 |
| ithp  | N/A | inferior thalamic peduncle                          | 265505110 | 9230      |   | F2F1F0 | 0 | 0 | 0 | 0 | 0 | 0 |
| ithp  | N/A | inferior thalamic peduncle, left                    | 265505114 | 265505110 | L | F2F1F0 | 0 | 0 | 0 | 0 | 0 | 0 |
| ithp  | N/A | inferior thalamic peduncle, right                   | 265505118 | 265505110 | R | F2F1F0 | 0 | 0 | 0 | 0 | 0 | 0 |
| ic    | N/A | internal capsule                                    | 9263      | 9230      |   | F2F1F0 | 0 | 0 | 0 | 0 | 0 | 0 |
| ic    | N/A | internal capsule, left                              | 9264      | 9263      | L | F2F1F0 | 0 | 0 | 0 | 0 | 0 | 0 |
| ic    | N/A | internal capsule, right                             | 9265      | 9263      | R | F2F1F0 | 0 | 0 | 0 | 0 | 0 | 0 |
| imlgp | N/A | internal medullary lamina of globus pallidus        | 265505122 | 9230      |   | F2F1F0 | 0 | 0 | 0 | 0 | 0 | 0 |
| imlgp | N/A | internal medullary lamina of globus pallidus, left  | 265505126 | 265505122 | L | F2F1F0 | 0 | 0 | 0 | 0 | 0 | 0 |
| imlgp | N/A | internal medullary lamina of globus pallidus, right | 265505130 | 265505122 | R | F2F1F0 | 0 | 0 | 0 | 0 | 0 | 0 |
| imlth | N/A | internal medullary lamina of thalamus               | 265505134 | 9230      |   | F2F1F0 | 0 | 0 | 0 | 0 | 0 | 0 |
| imlth | N/A | internal medullary lamina of thalamus, left         | 265505138 | 265505134 | L | F2F1F0 | 0 | 0 | 0 | 0 | 0 | 0 |
| imlth | N/A | internal medullary lamina of thalamus, right        | 265505142 | 265505134 | R | F2F1F0 | 0 | 0 | 0 | 0 | 0 | 0 |
| lls   | N/A | lateral longitudinal stria                          | 265505146 | 9230      |   | F2F1F0 | 0 | 0 | 0 | 0 | 0 | 0 |
| lls   | N/A | lateral longitudinal stria, left                    | 265505150 | 265505146 | L | F2F1F0 | 0 | 0 | 0 | 0 | 0 | 0 |
| lls   | N/A | lateral longitudinal stria, right                   | 265505154 | 265505146 | R | F2F1F0 | 0 | 0 | 0 | 0 | 0 | 0 |
| lef   | N/A | lenticular fasciculus                               | 265505158 | 9230      |   | F2F1F0 | 0 | 0 | 0 | 0 | 0 | 0 |
| lef   | N/A | lenticular fasciculus, left                         | 4510      | 265505158 | L | F2F1F0 | 0 | 0 | 0 | 0 | 0 | 0 |
| lef   | N/A | lenticular fasciculus, right                        | 4516      | 265505158 | R | F2F1F0 | 0 | 0 | 0 | 0 | 0 | 0 |
| mp    | N/A | mammillary peduncle                                 | 265505166 | 9230      |   | F2F1F0 | 0 | 0 | 0 | 0 | 0 | 0 |
| mp    | N/A | mammillary peduncle, left                           | 265505170 | 265505166 | L | F2F1F0 | 0 | 0 | 0 | 0 | 0 | 0 |
| mp    | N/A | mammillary peduncle, right                          | 265505174 | 265505166 | R | F2F1F0 | 0 | 0 | 0 | 0 | 0 | 0 |
| mtg   | N/A | mammillotegmental tract                             | 265505178 | 9230      |   | F2F1F0 | 0 | 0 | 0 | 0 | 0 | 0 |
| mtg   | N/A | mammillotegmental tract, left                       | 265505182 | 265505178 | L | F2F1F0 | 0 | 0 | 0 | 0 | 0 | 0 |
| mtg   | N/A | mammillotegmental tract, right                      | 265505186 | 265505178 | R | F2F1F0 | 0 | 0 | 0 | 0 | 0 | 0 |
| mtt   | N/A | mammillothalamic tract                              | 9266      | 9230      |   | F2F1F0 | 0 | 0 | 0 | 0 | 0 | 0 |
| mtt   | N/A | mammillothalamic tract, left                        | 9267      | 9266      | L | F2F1F0 | 0 | 0 | 0 | 0 | 0 | 0 |
| mtt   | N/A | mammillothalamic tract, right                       | 9268      | 9266      | R | F2F1F0 | 0 | 0 | 0 | 0 | 0 | 0 |
| mfb   | N/A | medial forebrain bundle                             | 265505190 | 9230      |   | F2F1F0 | 0 | 0 | 0 | 0 | 0 | 0 |
| mfb   | N/A | medial forebrain bundle, left                       | 265505194 | 265505190 | L | F2F1F0 | 0 | 0 | 0 | 0 | 0 | 0 |
| mfb   | N/A | medial forebrain bundle, right                      | 265505198 | 265505190 | R | F2F1F0 | 0 | 0 | 0 | 0 | 0 | 0 |
| mls   | N/A | medial longitudinal stria                           | 265505202 | 9230      |   | F2F1F0 | 0 | 0 | 0 | 0 | 0 | 0 |
| mls   | N/A | medial longitudinal stria, left                     | 265505206 | 265505202 | L | F2F1F0 | 0 | 0 | 0 | 0 | 0 | 0 |
| mls   | N/A | medial longitudinal stria, right                    | 265505210 | 265505202 | R | F2F1F0 | 0 | 0 | 0 | 0 | 0 | 0 |
| or-lp | N/A | Meyer's loop of optic radiation                     | 265505214 | 9230      |   | F2F1F0 | 0 | 0 | 0 | 0 | 0 | 0 |
| or-lp | N/A | Meyer's loop of optic radiation , left              | 265505218 | 265505214 | L | F2F1F0 | 0 | 0 | 0 | 0 | 0 | 0 |

|       |     |                                         |           |           |   |        |   |   |   |   |   |   |
|-------|-----|-----------------------------------------|-----------|-----------|---|--------|---|---|---|---|---|---|
| or-lp | N/A | Meyer's loop of optic radiation , right | 265505222 | 265505214 | R | F2F1F0 | 0 | 0 | 0 | 0 | 0 | 0 |
| milf  | N/A | middle longitudinal fasciculus          | 265505226 | 9230      |   | F2F1F0 | 0 | 0 | 0 | 0 | 0 | 0 |
| milf  | N/A | middle longitudinal fasciculus, left    | 265505230 | 265505226 | L | F2F1F0 | 0 | 0 | 0 | 0 | 0 | 0 |
| milf  | N/A | middle longitudinal fasciculus, right   | 265505234 | 265505226 | R | F2F1F0 | 0 | 0 | 0 | 0 | 0 | 0 |
| off   | N/A | occipitofrontal fasciculus              | 9269      | 9230      |   | F2F1F0 | 0 | 0 | 0 | 0 | 0 | 0 |
| off   | N/A | occipitofrontal fasciculus, left        | 9270      | 9269      | L | F2F1F0 | 0 | 0 | 0 | 0 | 0 | 0 |
| off   | N/A | occipitofrontal fasciculus, right       | 9271      | 9269      | R | F2F1F0 | 0 | 0 | 0 | 0 | 0 | 0 |
| orpt  | N/A | orbito-polar tract                      | 265505238 | 9230      |   | F2F1F0 | 0 | 0 | 0 | 0 | 0 | 0 |
| orpt  | N/A | orbito-polar tract, left                | 265505242 | 265505238 | L | F2F1F0 | 0 | 0 | 0 | 0 | 0 | 0 |
| orpt  | N/A | orbito-polar tract, right               | 265505246 | 265505238 | R | F2F1F0 | 0 | 0 | 0 | 0 | 0 | 0 |
| perf  | N/A | perforant path                          | 265505250 | 9230      |   | F2F1F0 | 0 | 0 | 0 | 0 | 0 | 0 |
| perf  | N/A | perforant path, left                    | 265505254 | 265505250 | L | F2F1F0 | 0 | 0 | 0 | 0 | 0 | 0 |
| perf  | N/A | perforant path, right                   | 265505258 | 265505250 | R | F2F1F0 | 0 | 0 | 0 | 0 | 0 | 0 |
| ppf   | N/A | perpendicular fasciculus                | 9272      | 9230      |   | F2F1F0 | 0 | 0 | 0 | 0 | 0 | 0 |
| ppf   | N/A | perpendicular fasciculus, left          | 9273      | 9272      | L | F2F1F0 | 0 | 0 | 0 | 0 | 0 | 0 |
| ppf   | N/A | perpendicular fasciculus, right         | 9274      | 9272      | R | F2F1F0 | 0 | 0 | 0 | 0 | 0 | 0 |
| ponb  | N/A | pontine bundle                          | 265505262 | 9230      |   | F2F1F0 | 0 | 0 | 0 | 0 | 0 | 0 |
| ponb  | N/A | pontine bundle, left                    | 265505266 | 265505262 | L | F2F1F0 | 0 | 0 | 0 | 0 | 0 | 0 |
| ponb  | N/A | pontine bundle, right                   | 265505270 | 265505262 | R | F2F1F0 | 0 | 0 | 0 | 0 | 0 | 0 |
| rthp  | N/A | rostral thalamic peduncle               | 265505274 | 9230      |   | F2F1F0 | 0 | 0 | 0 | 0 | 0 | 0 |
| rthp  | N/A | rostral thalamic peduncle, left         | 265505278 | 265505274 | L | F2F1F0 | 0 | 0 | 0 | 0 | 0 | 0 |
| rthp  | N/A | rostral thalamic peduncle, right        | 265505282 | 265505274 | R | F2F1F0 | 0 | 0 | 0 | 0 | 0 | 0 |
| sst   | N/A | sagittal stratum                        | 265505286 | 9230      |   | F2F1F0 | 0 | 0 | 0 | 0 | 0 | 0 |
| sst   | N/A | sagittal stratum, left                  | 265505290 | 265505286 | L | F2F1F0 | 0 | 0 | 0 | 0 | 0 | 0 |
| sste  | N/A | external sagittal stratum, left         | 265505294 | 265505290 | L | F2F1F0 | 0 | 0 | 0 | 0 | 0 | 0 |
| ssti  | N/A | internal sagittal stratum, left         | 265505298 | 265505290 | L | F2F1F0 | 0 | 0 | 0 | 0 | 0 | 0 |
| sst   | N/A | sagittal stratum, right                 | 265505302 | 265505286 | R | F2F1F0 | 0 | 0 | 0 | 0 | 0 | 0 |
| sste  | N/A | external sagittal stratum, right        | 265505306 | 265505302 | R | F2F1F0 | 0 | 0 | 0 | 0 | 0 | 0 |
| ssti  | N/A | internal sagittal stratum, right        | 265505310 | 265505302 | R | F2F1F0 | 0 | 0 | 0 | 0 | 0 | 0 |
| saf   | N/A | short association fibers                | 265505314 | 9230      |   | F2F1F0 | 0 | 0 | 0 | 0 | 0 | 0 |
| saf   | N/A | short association fibers, left          | 265505318 | 265505314 | L | F2F1F0 | 0 | 0 | 0 | 0 | 0 | 0 |
| saf   | N/A | short association fibers, right         | 265505322 | 265505314 | R | F2F1F0 | 0 | 0 | 0 | 0 | 0 | 0 |
| szt   | N/A | stratum zonale of thalamus              | 265505326 | 9230      |   | F2F1F0 | 0 | 0 | 0 | 0 | 0 | 0 |
| szt   | N/A | stratum zonale of thalamus, left        | 265505330 | 265505326 | L | F2F1F0 | 0 | 0 | 0 | 0 | 0 | 0 |
| szt   | N/A | stratum zonale of thalamus, right       | 265505334 | 265505326 | R | F2F1F0 | 0 | 0 | 0 | 0 | 0 | 0 |
| sm    | N/A | stria medullaris                        | 9275      | 9230      |   | F2F1F0 | 0 | 0 | 0 | 0 | 0 | 0 |
| sm    | N/A | stria medullaris, left                  | 9276      | 9275      | L | F2F1F0 | 0 | 0 | 0 | 0 | 0 | 0 |
| sm    | N/A | stria medullaris, right                 | 9277      | 9275      | R | F2F1F0 | 0 | 0 | 0 | 0 | 0 | 0 |
| st    | N/A | stria terminalis                        | 9278      | 9230      |   | F2F1F0 | 0 | 0 | 0 | 0 | 0 | 0 |
| st    | N/A | stria terminalis, left                  | 9279      | 9278      | L | F2F1F0 | 0 | 0 | 0 | 0 | 0 | 0 |

|       |     |                                                  |           |           |   |        |   |   |   |   |   |   |
|-------|-----|--------------------------------------------------|-----------|-----------|---|--------|---|---|---|---|---|---|
| st    | N/A | stria terminalis, right                          | 9280      | 9278      | R | F2F1F0 | 0 | 0 | 0 | 0 | 0 | 0 |
| scf   | N/A | subcallosal fasciculus                           | 265505338 | 9230      |   | F2F1F0 | 0 | 0 | 0 | 0 | 0 | 0 |
| scf   | N/A | subcallosal fasciculus, left                     | 265505342 | 265505338 | L | F2F1F0 | 0 | 0 | 0 | 0 | 0 | 0 |
| scf   | N/A | subcallosal fasciculus, right                    | 265505346 | 265505338 | R | F2F1F0 | 0 | 0 | 0 | 0 | 0 | 0 |
| sthf  | N/A | subthalamic fasciculus                           | 265505350 | 9230      |   | F2F1F0 | 0 | 0 | 0 | 0 | 0 | 0 |
| sthf  | N/A | subthalamic fasciculus, left                     | 265505354 | 265505350 | L | F2F1F0 | 0 | 0 | 0 | 0 | 0 | 0 |
| sthf  | N/A | subthalamic fasciculus, right                    | 265505358 | 265505350 | R | F2F1F0 | 0 | 0 | 0 | 0 | 0 | 0 |
| sprs  | N/A | superficial presubicular path                    | 265505362 | 9230      |   | F2F1F0 | 0 | 0 | 0 | 0 | 0 | 0 |
| sprs  | N/A | superficial presubicular path, left              | 265505366 | 265505362 | L | F2F1F0 | 0 | 0 | 0 | 0 | 0 | 0 |
| sprs  | N/A | superficial presubicular path, right             | 265505370 | 265505362 | R | F2F1F0 | 0 | 0 | 0 | 0 | 0 | 0 |
| slf   | N/A | superior longitudinal fasciculus                 | 9281      | 9230      |   | F2F1F0 | 0 | 0 | 0 | 0 | 0 | 0 |
| slf   | N/A | superior longitudinal fasciculus, left           | 9282      | 9281      | L | F2F1F0 | 0 | 0 | 0 | 0 | 0 | 0 |
| slf   | N/A | superior longitudinal fasciculus, right          | 9283      | 9281      | R | F2F1F0 | 0 | 0 | 0 | 0 | 0 | 0 |
| thf   | N/A | thalamic fasciculus                              | 265505374 | 9230      |   | F2F1F0 | 0 | 0 | 0 | 0 | 0 | 0 |
| thf   | N/A | thalamic fasciculus, left                        | 4509      | 265505374 | L | F2F1F0 | 0 | 0 | 0 | 0 | 0 | 0 |
| thf   | N/A | thalamic fasciculus, right                       | 4515      | 265505374 | R | F2F1F0 | 0 | 0 | 0 | 0 | 0 | 0 |
| uf    | N/A | uncinate fasciculus of the forebrain             | 9284      | 9230      |   | F2F1F0 | 0 | 0 | 0 | 0 | 0 | 0 |
| uf    | N/A | uncinate fasciculus of the forebrain, left       | 9285      | 9284      | L | F2F1F0 | 0 | 0 | 0 | 0 | 0 | 0 |
| uf    | N/A | uncinate fasciculus of the forebrain, right      | 9286      | 9284      | R | F2F1F0 | 0 | 0 | 0 | 0 | 0 | 0 |
| MESWM | N/A | mesencephalic white matter                       | 265505382 | 9218      |   | F2F1F0 | 0 | 0 | 0 | 0 | 0 | 0 |
| bic   | N/A | brachium of the inferior colliculus              | 265505386 | 265505382 |   | F2F1F0 | 0 | 0 | 0 | 0 | 0 | 0 |
| bic   | N/A | brachium of the inferior colliculus, left        | 265505390 | 265505386 | L | F2F1F0 | 0 | 0 | 0 | 0 | 0 | 0 |
| bic   | N/A | brachium of the inferior colliculus, right       | 265505394 | 265505386 | R | F2F1F0 | 0 | 0 | 0 | 0 | 0 | 0 |
| bsc   | N/A | brachium of the superior colliculus              | 265505398 | 265505382 |   | F2F1F0 | 0 | 0 | 0 | 0 | 0 | 0 |
| bsc   | N/A | brachium of the superior colliculus, left        | 265505402 | 265505398 | L | F2F1F0 | 0 | 0 | 0 | 0 | 0 | 0 |
| bsc   | N/A | brachium of the superior colliculus, right       | 265505406 | 265505398 | R | F2F1F0 | 0 | 0 | 0 | 0 | 0 | 0 |
| ctg-m | N/A | central tegmental tract, midbrain portion        | 265505410 | 265505382 |   | F2F1F0 | 0 | 0 | 0 | 0 | 0 | 0 |
| ctg-m | N/A | central tegmental tract, midbrain portion, left  | 265505414 | 265505410 | L | F2F1F0 | 0 | 0 | 0 | 0 | 0 | 0 |
| ctg-m | N/A | central tegmental tract, midbrain portion, right | 265505418 | 265505410 | R | F2F1F0 | 0 | 0 | 0 | 0 | 0 | 0 |
| cpd   | N/A | cerebral peduncle (crus cerebri)                 | 265505422 | 265505382 |   | F2F1F0 | 0 | 0 | 0 | 0 | 0 | 0 |
| cpd   | N/A | cerebral peduncle (crus cerebri), left           | 265505426 | 265505422 | L | F2F1F0 | 0 | 0 | 0 | 0 | 0 | 0 |
| cpd   | N/A | cerebral peduncle (crus cerebri), right          | 265505430 | 265505422 | R | F2F1F0 | 0 | 0 | 0 | 0 | 0 | 0 |
| cmic  | N/A | commissure of the inferior colliculus            | 265505434 | 265505382 |   | F2F1F0 | 0 | 0 | 0 | 0 | 0 | 0 |
| cmic  | N/A | commissure of the inferior colliculus, left      | 265505438 | 265505434 | L | F2F1F0 | 0 | 0 | 0 | 0 | 0 | 0 |
| cmic  | N/A | commissure of the inferior colliculus, right     | 265505442 | 265505434 | R | F2F1F0 | 0 | 0 | 0 | 0 | 0 | 0 |
| cbu-m | N/A | corticobulbar tract, midbrain portion            | 265505446 | 265505382 |   | F2F1F0 | 0 | 0 | 0 | 0 | 0 | 0 |
| cbu-m | N/A | corticobulbar tract, midbrain portion, left      | 265505450 | 265505446 | L | F2F1F0 | 0 | 0 | 0 | 0 | 0 | 0 |
| cbu-m | N/A | corticobulbar tract, midbrain portion, right     | 265505454 | 265505446 | R | F2F1F0 | 0 | 0 | 0 | 0 | 0 | 0 |

|       |     |                                                 |           |           |   |        |   |   |   |   |   |   |
|-------|-----|-------------------------------------------------|-----------|-----------|---|--------|---|---|---|---|---|---|
| me5   | N/A | mesencephalic trigeminal tract                  | 265505458 | 265505382 |   | F2F1F0 | 0 | 0 | 0 | 0 | 0 | 0 |
| me5   | N/A | mesencephalic trigeminal tract, left            | 265505462 | 265505458 | L | F2F1F0 | 0 | 0 | 0 | 0 | 0 | 0 |
| me5   | N/A | mesencephalic trigeminal tract, right           | 265505466 | 265505458 | R | F2F1F0 | 0 | 0 | 0 | 0 | 0 | 0 |
| METWM | N/A | metencephalic white matter                      | 9287      | 9218      |   | F2F1F0 | 0 | 0 | 0 | 0 | 0 | 0 |
| CbWM  | N/A | cerebellar white matter tracts                  | 9288      | 9287      |   | F2F1F0 | 0 | 0 | 0 | 0 | 0 | 0 |
| icp   | N/A | inferior cerebellar peduncle                    | 9289      | 9288      |   | F2F1F0 | 0 | 0 | 0 | 0 | 0 | 0 |
| icp   | N/A | inferior cerebellar peduncle, Left              | 9290      | 9289      | L | F2F1F0 | 0 | 0 | 0 | 0 | 0 | 0 |
| icp   | N/A | inferior cerebellar peduncle, Right             | 9291      | 9289      | R | F2F1F0 | 0 | 0 | 0 | 0 | 0 | 0 |
| mcp   | N/A | middle cerebellar peduncle                      | 9292      | 9288      |   | F2F1F0 | 0 | 0 | 0 | 0 | 0 | 0 |
| mcp   | N/A | middle cerebellar peduncle, Left                | 9293      | 9292      | L | F2F1F0 | 0 | 0 | 0 | 0 | 0 | 0 |
| mcp   | N/A | middle cerebellar peduncle, Right               | 9294      | 9292      | R | F2F1F0 | 0 | 0 | 0 | 0 | 0 | 0 |
| pncb  | N/A | ponto-cerebellar tract                          | 265505470 | 9288      |   | F2F1F0 | 0 | 0 | 0 | 0 | 0 | 0 |
| pncb  | N/A | ponto-cerebellar tract, left                    | 265505474 | 265505470 | L | F2F1F0 | 0 | 0 | 0 | 0 | 0 | 0 |
| pncb  | N/A | ponto-cerebellar tract, right                   | 265505478 | 265505470 | R | F2F1F0 | 0 | 0 | 0 | 0 | 0 | 0 |
| scp   | N/A | superior cerebellar peduncle                    | 9295      | 9288      |   | F2F1F0 | 0 | 0 | 0 | 0 | 0 | 0 |
| scp   | N/A | superior cerebellar peduncle, Left              | 9296      | 9295      | L | F2F1F0 | 0 | 0 | 0 | 0 | 0 | 0 |
| scp   | N/A | superior cerebellar peduncle, Right             | 9297      | 9295      | R | F2F1F0 | 0 | 0 | 0 | 0 | 0 | 0 |
| xscp  | N/A | decussation of the superior cerebellar peduncle | 265505482 | 9295      |   | F2F1F0 | 0 | 0 | 0 | 0 | 0 | 0 |
| PoWM  | N/A | pontine white matter tracts                     | 265505486 | 9287      |   | F2F1F0 | 0 | 0 | 0 | 0 | 0 | 0 |
| cpn   | N/A | cortico-pontine fibers                          | 265505490 | 265505486 |   | F2F1F0 | 0 | 0 | 0 | 0 | 0 | 0 |
| cpn   | N/A | cortico-pontine fibers, left                    | 265505494 | 265505490 | L | F2F1F0 | 0 | 0 | 0 | 0 | 0 | 0 |
| cpn   | N/A | cortico-pontine fibers, right                   | 265505498 | 265505490 | R | F2F1F0 | 0 | 0 | 0 | 0 | 0 | 0 |
| lfpn  | N/A | longitudinal fasciculus of the pons             | 265505502 | 265505486 |   | F2F1F0 | 0 | 0 | 0 | 0 | 0 | 0 |
| lfpn  | N/A | longitudinal fasciculus of the pons, left       | 265505506 | 265505502 | L | F2F1F0 | 0 | 0 | 0 | 0 | 0 | 0 |
| lfpn  | N/A | longitudinal fasciculus of the pons, right      | 265505510 | 265505502 | R | F2F1F0 | 0 | 0 | 0 | 0 | 0 | 0 |
| MYWM  | N/A | myelencephalic white matter                     | 9298      | 9218      |   | F2F1F0 | 0 | 0 | 0 | 0 | 0 | 0 |
| CN    | N/A | cranial nerves                                  | 9299      | 9298      |   | F2F1F0 | 0 | 0 | 0 | 0 | 0 | 0 |
| 1n    | N/A | olfactory nerve                                 | 9300      | 9299      |   | F2F1F0 | 0 | 0 | 0 | 0 | 0 | 0 |
| 1n    | N/A | olfactory nerve, left                           | 9301      | 9300      | L | F2F1F0 | 0 | 0 | 0 | 0 | 0 | 0 |
| olf   | N/A | olfactory tract, left                           | 9302      | 9301      | L | F2F1F0 | 0 | 0 | 0 | 0 | 0 | 0 |
| lot   | N/A | lateral olfactory tract, left                   | 265505514 | 9302      | L | F2F1F0 | 0 | 0 | 0 | 0 | 0 | 0 |
| mot   | N/A | medial olfactory tract, left                    | 265505518 | 9302      | L | F2F1F0 | 0 | 0 | 0 | 0 | 0 | 0 |
| Olf   | N/A | olfactory bulb, left                            | 9303      | 9301      | L | F2F1F0 | 0 | 0 | 0 | 0 | 0 | 0 |
| 1n    | N/A | olfactory nerve, right                          | 9304      | 9300      | R | F2F1F0 | 0 | 0 | 0 | 0 | 0 | 0 |
| olf   | N/A | olfactory tract, right                          | 9305      | 9304      | R | F2F1F0 | 0 | 0 | 0 | 0 | 0 | 0 |
| lot   | N/A | lateral olfactory tract, right                  | 265505522 | 9305      | R | F2F1F0 | 0 | 0 | 0 | 0 | 0 | 0 |
| mot   | N/A | medial olfactory tract, right                   | 265505526 | 9305      | R | F2F1F0 | 0 | 0 | 0 | 0 | 0 | 0 |
| Olf   | N/A | olfactory bulb, right                           | 9306      | 9304      | R | F2F1F0 | 0 | 0 | 0 | 0 | 0 | 0 |
| 2n    | N/A | optic nerve                                     | 9307      | 9299      |   | F2F1F0 | 0 | 0 | 0 | 0 | 0 | 0 |

|      |     |                                 |           |      |   |        |   |   |   |   |   |   |
|------|-----|---------------------------------|-----------|------|---|--------|---|---|---|---|---|---|
| 2n   | N/A | optic nerve, left               | 9308      | 9307 | L | F2F1F0 | 0 | 0 | 0 | 0 | 0 | 0 |
| opt  | N/A | optic tract, left               | 9309      | 9308 | L | F2F1F0 | 0 | 0 | 0 | 0 | 0 | 0 |
| ox   | N/A | optic chiasm, left              | 9310      | 9308 | L | F2F1F0 | 0 | 0 | 0 | 0 | 0 | 0 |
| or   | N/A | optic radiations, left          | 9311      | 9308 | L | F2F1F0 | 0 | 0 | 0 | 0 | 0 | 0 |
| sox  | N/A | supraoptic dicussion, left      | 265505530 | 9308 | L | F2F1F0 | 0 | 0 | 0 | 0 | 0 | 0 |
| 2n   | N/A | optic nerve, right              | 9312      | 9307 | R | F2F1F0 | 0 | 0 | 0 | 0 | 0 | 0 |
| opt  | N/A | optic tract, right              | 9313      | 9312 | R | F2F1F0 | 0 | 0 | 0 | 0 | 0 | 0 |
| ox   | N/A | optic chiasm, right             | 9314      | 9312 | R | F2F1F0 | 0 | 0 | 0 | 0 | 0 | 0 |
| or   | N/A | optic radiations, right         | 9315      | 9312 | R | F2F1F0 | 0 | 0 | 0 | 0 | 0 | 0 |
| sox  | N/A | supraoptic dicussion, right     | 265505534 | 9312 | R | F2F1F0 | 0 | 0 | 0 | 0 | 0 | 0 |
| 3n   | N/A | occulomotor nerve               | 9316      | 9299 |   | F2F1F0 | 0 | 0 | 0 | 0 | 0 | 0 |
| 3n   | N/A | occulomotor nerve, left         | 9317      | 9316 | L | F2F1F0 | 0 | 0 | 0 | 0 | 0 | 0 |
| 3n   | N/A | occulomotor nerve, right        | 9318      | 9316 | R | F2F1F0 | 0 | 0 | 0 | 0 | 0 | 0 |
| 4n   | N/A | trochlear nerve                 | 9319      | 9299 |   | F2F1F0 | 0 | 0 | 0 | 0 | 0 | 0 |
| 4n   | N/A | trochlear nerve, left           | 9320      | 9319 | L | F2F1F0 | 0 | 0 | 0 | 0 | 0 | 0 |
| 4n   | N/A | trochlear nerve, right          | 9321      | 9319 | R | F2F1F0 | 0 | 0 | 0 | 0 | 0 | 0 |
| 5n   | N/A | trigeminal nerve                | 9322      | 9299 |   | F2F1F0 | 0 | 0 | 0 | 0 | 0 | 0 |
| 5n   | N/A | trigeminal nerve, left          | 9323      | 9322 | L | F2F1F0 | 0 | 0 | 0 | 0 | 0 | 0 |
| 5n   | N/A | trigeminal nerve, right         | 9324      | 9322 | R | F2F1F0 | 0 | 0 | 0 | 0 | 0 | 0 |
| 6n   | N/A | abducens nerve                  | 9325      | 9299 |   | F2F1F0 | 0 | 0 | 0 | 0 | 0 | 0 |
| 6n   | N/A | abducens nerve, left            | 9326      | 9325 | L | F2F1F0 | 0 | 0 | 0 | 0 | 0 | 0 |
| 6n   | N/A | abducens nerve, right           | 9327      | 9325 | R | F2F1F0 | 0 | 0 | 0 | 0 | 0 | 0 |
| 7n   | N/A | facial nerve                    | 9328      | 9299 |   | F2F1F0 | 0 | 0 | 0 | 0 | 0 | 0 |
| 7n   | N/A | facial nerve, left              | 9329      | 9328 | L | F2F1F0 | 0 | 0 | 0 | 0 | 0 | 0 |
| 7n   | N/A | facial nerve, right             | 9330      | 9328 | R | F2F1F0 | 0 | 0 | 0 | 0 | 0 | 0 |
| 8n   | N/A | vestibulocochlear nerve         | 9331      | 9299 |   | F2F1F0 | 0 | 0 | 0 | 0 | 0 | 0 |
| 8n   | N/A | vestibulochochlear nerve, left  | 9332      | 9331 | L | F2F1F0 | 0 | 0 | 0 | 0 | 0 | 0 |
| 8n   | N/A | vestibulochochlear nerve, right | 9333      | 9331 | R | F2F1F0 | 0 | 0 | 0 | 0 | 0 | 0 |
| 9n   | N/A | glossopharyngeal nerve          | 9334      | 9299 |   | F2F1F0 | 0 | 0 | 0 | 0 | 0 | 0 |
| 9n   | N/A | glossopharyngeal nerve, left    | 9335      | 9334 | L | F2F1F0 | 0 | 0 | 0 | 0 | 0 | 0 |
| 9n   | N/A | glossopharyngeal nerve, right   | 9336      | 9334 | R | F2F1F0 | 0 | 0 | 0 | 0 | 0 | 0 |
| 10n  | N/A | vagus nerve                     | 9337      | 9299 |   | F2F1F0 | 0 | 0 | 0 | 0 | 0 | 0 |
| 10n  | N/A | vagus nerve, left               | 9338      | 9337 | L | F2F1F0 | 0 | 0 | 0 | 0 | 0 | 0 |
| 10n  | N/A | vagus nerve, right              | 9339      | 9337 | R | F2F1F0 | 0 | 0 | 0 | 0 | 0 | 0 |
| 11nf | N/A | accessory nerve                 | 9340      | 9299 |   | F2F1F0 | 0 | 0 | 0 | 0 | 0 | 0 |
| 11nf | N/A | accessory nerve, left           | 9341      | 9340 | L | F2F1F0 | 0 | 0 | 0 | 0 | 0 | 0 |
| 11nf | N/A | accessory nerve, right          | 9342      | 9340 | R | F2F1F0 | 0 | 0 | 0 | 0 | 0 | 0 |
| 12n  | N/A | hypoglossal nerve               | 9343      | 9299 |   | F2F1F0 | 0 | 0 | 0 | 0 | 0 | 0 |
| 12n  | N/A | hypoglossal nerve, left         | 9344      | 9343 | L | F2F1F0 | 0 | 0 | 0 | 0 | 0 | 0 |
| 12n  | N/A | hypoglossal nerve, right        | 9345      | 9343 | R | F2F1F0 | 0 | 0 | 0 | 0 | 0 | 0 |

|       |     |                                               |           |           |   |        |   |   |   |   |   |   |
|-------|-----|-----------------------------------------------|-----------|-----------|---|--------|---|---|---|---|---|---|
| ami   | N/A | amiculum of the olive                         | 265505538 | 9298      |   | F2F1F0 | 0 | 0 | 0 | 0 | 0 | 0 |
| ami   | N/A | amiculum of the olive, left                   | 265505542 | 265505538 | L | F2F1F0 | 0 | 0 | 0 | 0 | 0 | 0 |
| ami   | N/A | amiculum of the olive, right                  | 265505546 | 265505538 | R | F2F1F0 | 0 | 0 | 0 | 0 | 0 | 0 |
| cuf   | N/A | cuneate fasciculus                            | 265505550 | 9298      |   | F2F1F0 | 0 | 0 | 0 | 0 | 0 | 0 |
| cuf   | N/A | cuneate fasciculus, left                      | 265505554 | 265505550 | L | F2F1F0 | 0 | 0 | 0 | 0 | 0 | 0 |
| cuf   | N/A | cuneate fasciculus, right                     | 265505558 | 265505550 | R | F2F1F0 | 0 | 0 | 0 | 0 | 0 | 0 |
| dlf   | N/A | dorsal longitudinal fasciculus                | 9346      | 9298      |   | F2F1F0 | 0 | 0 | 0 | 0 | 0 | 0 |
| dlf   | N/A | dorsal longitudinal fasciculus, Left          | 9347      | 9346      | L | F2F1F0 | 0 | 0 | 0 | 0 | 0 | 0 |
| dlf   | N/A | dorsal longitudinal fasciculus, Right         | 9348      | 9346      | R | F2F1F0 | 0 | 0 | 0 | 0 | 0 | 0 |
| mlf   | N/A | medial longitudinal fasciculus                | 9349      | 9298      |   | F2F1F0 | 0 | 0 | 0 | 0 | 0 | 0 |
| mlf   | N/A | medial longitudinal fasciculus, Left          | 9350      | 9349      | L | F2F1F0 | 0 | 0 | 0 | 0 | 0 | 0 |
| mlf   | N/A | medial longitudinal fasciculus, Right         | 9351      | 9349      | R | F2F1F0 | 0 | 0 | 0 | 0 | 0 | 0 |
| ctg   | N/A | central tegmental tract                       | 12950     | 9298      |   | F2F1F0 | 0 | 0 | 0 | 0 | 0 | 0 |
| ctg   | N/A | central tegmental tract, Left                 | 12951     | 12950     | L | F2F1F0 | 0 | 0 | 0 | 0 | 0 | 0 |
| ctg   | N/A | central tegmental tract, Right                | 12952     | 12950     | R | F2F1F0 | 0 | 0 | 0 | 0 | 0 | 0 |
| cbu-h | N/A | corticobulbar tract, hindbrain portion        | 265505562 | 9298      |   | F2F1F0 | 0 | 0 | 0 | 0 | 0 | 0 |
| cbu-h | N/A | corticobulbar tract, hindbrain portion, left  | 265505566 | 265505562 | L | F2F1F0 | 0 | 0 | 0 | 0 | 0 | 0 |
| cbu-h | N/A | corticobulbar tract, hindbrain portion, right | 265505570 | 265505562 | R | F2F1F0 | 0 | 0 | 0 | 0 | 0 | 0 |
| csp   | N/A | corticospinal tract                           | 265505574 | 9298      |   | F2F1F0 | 0 | 0 | 0 | 0 | 0 | 0 |
| csp   | N/A | corticospinal tract, left                     | 265505578 | 265505574 | L | F2F1F0 | 0 | 0 | 0 | 0 | 0 | 0 |
| csp   | N/A | corticospinal tract, right                    | 265505582 | 265505574 | R | F2F1F0 | 0 | 0 | 0 | 0 | 0 | 0 |
| fr    | N/A | fasciculus retroflexus                        | 12953     | 9298      |   | F2F1F0 | 0 | 0 | 0 | 0 | 0 | 0 |
| fr    | N/A | fasciculus retroflexus, Left                  | 12954     | 12953     | L | F2F1F0 | 0 | 0 | 0 | 0 | 0 | 0 |
| fr    | N/A | fasciculus retroflexus, Right                 | 12955     | 12953     | R | F2F1F0 | 0 | 0 | 0 | 0 | 0 | 0 |
| gr    | N/A | gracile fasciculus                            | 265505586 | 9298      |   | F2F1F0 | 0 | 0 | 0 | 0 | 0 | 0 |
| gr    | N/A | gracile fasciculus, left                      | 265505590 | 265505586 | L | F2F1F0 | 0 | 0 | 0 | 0 | 0 | 0 |
| gr    | N/A | gracile fasciculus, right                     | 265505594 | 265505586 | R | F2F1F0 | 0 | 0 | 0 | 0 | 0 | 0 |
| hio   | N/A | hilus of the inferior olive                   | 265505598 | 9298      |   | F2F1F0 | 0 | 0 | 0 | 0 | 0 | 0 |
| hio   | N/A | hilus of the inferior olive, left             | 265505602 | 265505598 | L | F2F1F0 | 0 | 0 | 0 | 0 | 0 | 0 |
| hio   | N/A | hilus of the inferior olive, right            | 265505606 | 265505598 | R | F2F1F0 | 0 | 0 | 0 | 0 | 0 | 0 |
| iaf   | N/A | internal arcuate fibers                       | 265505610 | 9298      |   | F2F1F0 | 0 | 0 | 0 | 0 | 0 | 0 |
| iaf   | N/A | internal arcuate fibers, left                 | 265505614 | 265505610 | L | F2F1F0 | 0 | 0 | 0 | 0 | 0 | 0 |
| iaf   | N/A | internal arcuate fibers, right                | 265505618 | 265505610 | R | F2F1F0 | 0 | 0 | 0 | 0 | 0 | 0 |
| ll    | N/A | lateral lemniscus                             | 12956     | 9298      |   | F2F1F0 | 0 | 0 | 0 | 0 | 0 | 0 |
| ll    | N/A | lateral lemniscus, Left                       | 12957     | 12956     | L | F2F1F0 | 0 | 0 | 0 | 0 | 0 | 0 |
| ll    | N/A | lateral lemniscus, Right                      | 12958     | 12956     | R | F2F1F0 | 0 | 0 | 0 | 0 | 0 | 0 |
| ml    | N/A | medial lemniscus                              | 12959     | 9298      |   | F2F1F0 | 0 | 0 | 0 | 0 | 0 | 0 |
| ml    | N/A | medial lemniscus, Left                        | 12960     | 12959     | L | F2F1F0 | 0 | 0 | 0 | 0 | 0 | 0 |
| ml    | N/A | medial lemniscus, Right                       | 12961     | 12959     | R | F2F1F0 | 0 | 0 | 0 | 0 | 0 | 0 |
| xml   | N/A | decussation of medial lemniscus               | 265505622 | 12959     |   | F2F1F0 | 0 | 0 | 0 | 0 | 0 | 0 |



|       |     |                                      |           |           |   |        |   |   |   |   |   |   |
|-------|-----|--------------------------------------|-----------|-----------|---|--------|---|---|---|---|---|---|
| py    | N/A | pyramidal tract                      | 12962     | 9298      |   | F2F1F0 | 0 | 0 | 0 | 0 | 0 | 0 |
| py    | N/A | pyramidal tract, Left                | 12963     | 12962     | L | F2F1F0 | 0 | 0 | 0 | 0 | 0 | 0 |
| py    | N/A | pyramidal tract, Right               | 12964     | 12962     | R | F2F1F0 | 0 | 0 | 0 | 0 | 0 | 0 |
| pyx   | N/A | pyramidal decussation                | 12965     | 12962     |   | F2F1F0 | 0 | 0 | 0 | 0 | 0 | 0 |
| sol   | N/A | solitary tract                       | 265505626 | 9298      |   | F2F1F0 | 0 | 0 | 0 | 0 | 0 | 0 |
| sol   | N/A | solitary tract, left                 | 265505630 | 265505626 | L | F2F1F0 | 0 | 0 | 0 | 0 | 0 | 0 |
| sol   | N/A | solitary tract, right                | 265505634 | 265505626 | R | F2F1F0 | 0 | 0 | 0 | 0 | 0 | 0 |
| slh   | N/A | spinal lemniscus in hindbrain        | 265505638 | 9298      |   | F2F1F0 | 0 | 0 | 0 | 0 | 0 | 0 |
| slh   | N/A | spinal lemniscus in hindbrain, left  | 265505642 | 265505638 | L | F2F1F0 | 0 | 0 | 0 | 0 | 0 | 0 |
| slh   | N/A | spinal lemniscus in hindbrain, right | 265505646 | 265505638 | R | F2F1F0 | 0 | 0 | 0 | 0 | 0 | 0 |
| sp5   | N/A | spinal trigeminal tract              | 265505650 | 9298      |   | F2F1F0 | 0 | 0 | 0 | 0 | 0 | 0 |
| sp5   | N/A | spinal trigeminal tract, left        | 265505654 | 265505650 | L | F2F1F0 | 0 | 0 | 0 | 0 | 0 | 0 |
| sp5   | N/A | spinal trigeminal tract, right       | 265505658 | 265505650 | R | F2F1F0 | 0 | 0 | 0 | 0 | 0 | 0 |
| tsp   | N/A | tectospinal tract                    | 265505662 | 9298      |   | F2F1F0 | 0 | 0 | 0 | 0 | 0 | 0 |
| tsp   | N/A | tectospinal tract, left              | 265505666 | 265505662 | L | F2F1F0 | 0 | 0 | 0 | 0 | 0 | 0 |
| tsp   | N/A | tectospinal tract, right             | 265505670 | 265505662 | R | F2F1F0 | 0 | 0 | 0 | 0 | 0 | 0 |
| vtg   | N/A | ventral tegmental tract              | 265505674 | 9298      |   | F2F1F0 | 0 | 0 | 0 | 0 | 0 | 0 |
| vtg   | N/A | ventral tegmental tract, left        | 265505678 | 265505674 | L | F2F1F0 | 0 | 0 | 0 | 0 | 0 | 0 |
| vtg   | N/A | ventral tegmental tract, right       | 265505682 | 265505674 | R | F2F1F0 | 0 | 0 | 0 | 0 | 0 | 0 |
| veme  | N/A | vestibulomesencephalic tract         | 265505686 | 9298      |   | F2F1F0 | 0 | 0 | 0 | 0 | 0 | 0 |
| veme  | N/A | vestibulomesencephalic tract, left   | 265505690 | 265505686 | L | F2F1F0 | 0 | 0 | 0 | 0 | 0 | 0 |
| veme  | N/A | vestibulomesencephalic tract, right  | 265505694 | 265505686 | R | F2F1F0 | 0 | 0 | 0 | 0 | 0 | 0 |
| SS    | N/A | sulci & spaces                       | 9352      | 4005      |   | 6D6E70 | 0 | 0 | 0 | 0 | 0 | 0 |
| TELEs | N/A | telencephalic spaces                 | 9353      | 9352      |   | 6D6E70 | 0 | 0 | 0 | 0 | 0 | 0 |
| SSmd  | N/A | major divisions                      | 9400      | 9353      |   | 6D6E70 | 0 | 0 | 0 | 0 | 0 | 0 |
| cas   | N/A | callosal sulcus                      | 9404      | 9400      |   | 6D6E70 | 0 | 0 | 0 | 0 | 0 | 0 |
| cs    | N/A | central sulcus                       | 9403      | 9400      |   | 6D6E70 | 0 | 0 | 0 | 0 | 0 | 0 |
| lf    | N/A | longitudinal fissure                 | 9401      | 9400      |   | 6D6E70 | 0 | 0 | 0 | 0 | 0 | 0 |
| sf    | N/A | sylvian fissure                      | 9402      | 9400      |   | 6D6E70 | 0 | 0 | 0 | 0 | 0 | 0 |
| FLs   | N/A | frontal lobe sulci                   | 9354      | 9353      |   | 6D6E70 | 0 | 0 | 0 | 0 | 0 | 0 |
| apos  | N/A | anterior parolfactory sulcus         | 9368      | 9354      |   | 6D6E70 | 0 | 0 | 0 | 0 | 0 | 0 |
| cgs   | N/A | cingulate sulcus                     | 9364      | 9354      |   | 6D6E70 | 0 | 0 | 0 | 0 | 0 | 0 |
| fms   | N/A | frontomarginal sulcus                | 9363      | 9354      |   | 6D6E70 | 0 | 0 | 0 | 0 | 0 | 0 |
| fros  | N/A | fronto-orbital sulcus                | 9362      | 9354      |   | 6D6E70 | 0 | 0 | 0 | 0 | 0 | 0 |
| ifs   | N/A | inferior frontal sulcus              | 9357      | 9354      |   | 6D6E70 | 0 | 0 | 0 | 0 | 0 | 0 |
| iros  | N/A | inferior rostral sulcus              | 9367      | 9354      |   | 6D6E70 | 0 | 0 | 0 | 0 | 0 | 0 |
| infs  | N/A | intermediate frontal sulcus          | 9358      | 9354      |   | 6D6E70 | 0 | 0 | 0 | 0 | 0 | 0 |
| mfs   | N/A | medial frontal sulcus                | 9359      | 9354      |   | 6D6E70 | 0 | 0 | 0 | 0 | 0 | 0 |
| olfs  | N/A | olfactory sulcus                     | 9361      | 9354      |   | 6D6E70 | 0 | 0 | 0 | 0 | 0 | 0 |
| orbs  | N/A | orbital sulcus                       | 9360      | 9354      |   | 6D6E70 | 0 | 0 | 0 | 0 | 0 | 0 |

|      |     |                               |       |      |        |   |   |   |   |   |   |
|------|-----|-------------------------------|-------|------|--------|---|---|---|---|---|---|
| pcs  | N/A | paracentral sulcus            | 9365  | 9354 | 6D6E70 | 0 | 0 | 0 | 0 | 0 | 0 |
| ppos | N/A | posterior parolfactory sulcus | 9369  | 9354 | 6D6E70 | 0 | 0 | 0 | 0 | 0 | 0 |
| prcs | N/A | precentral sulcus             | 9355  | 9354 | 6D6E70 | 0 | 0 | 0 | 0 | 0 | 0 |
| sfrs | N/A | superior frontal sulcus       | 9356  | 9354 | 6D6E70 | 0 | 0 | 0 | 0 | 0 | 0 |
| sros | N/A | superior rostral sulcus       | 9366  | 9354 | 6D6E70 | 0 | 0 | 0 | 0 | 0 | 0 |
| ILs  | N/A | insular lobe sulci            | 9397  | 9353 | 6D6E70 | 0 | 0 | 0 | 0 | 0 | 0 |
| cis  | N/A | central sulcus of insula      | 9399  | 9397 | 6D6E70 | 0 | 0 | 0 | 0 | 0 | 0 |
| crs  | N/A | circular sulcus               | 9398  | 9397 | 6D6E70 | 0 | 0 | 0 | 0 | 0 | 0 |
| LLs  | N/A | limbic lobe sulci             | 9393  | 9353 | 6D6E70 | 0 | 0 | 0 | 0 | 0 | 0 |
| his  | N/A | hippocampal sulcus            | 9394  | 9393 | 6D6E70 | 0 | 0 | 0 | 0 | 0 | 0 |
| ssa  | N/A | sulcus semi-anularis          | 9395  | 9393 | 6D6E70 | 0 | 0 | 0 | 0 | 0 | 0 |
| us   | N/A | uncal sulcus                  | 9396  | 9393 | 6D6E70 | 0 | 0 | 0 | 0 | 0 | 0 |
| OLs  | N/A | occipital lobe sulci          | 9386  | 9353 | 6D6E70 | 0 | 0 | 0 | 0 | 0 | 0 |
| ccs  | N/A | calcarine sulcus              | 9391  | 9386 | 6D6E70 | 0 | 0 | 0 | 0 | 0 | 0 |
| locs | N/A | lateral occipital sulcus      | 9389  | 9386 | 6D6E70 | 0 | 0 | 0 | 0 | 0 | 0 |
| lus  | N/A | lunate sulcus                 | 9390  | 9386 | 6D6E70 | 0 | 0 | 0 | 0 | 0 | 0 |
| pos  | N/A | parieto-occipital sulcus      | 9392  | 9386 | 6D6E70 | 0 | 0 | 0 | 0 | 0 | 0 |
| pon  | N/A | preoccipital notch            | 9387  | 9386 | 6D6E70 | 0 | 0 | 0 | 0 | 0 | 0 |
| tocs | N/A | transverse occipital sulcus   | 9388  | 9386 | 6D6E70 | 0 | 0 | 0 | 0 | 0 | 0 |
| PLs  | N/A | parietal lobe sulci           | 9370  | 9353 | 6D6E70 | 0 | 0 | 0 | 0 | 0 | 0 |
| itps | N/A | intraparietal sulcus          | 9372  | 9370 | 6D6E70 | 0 | 0 | 0 | 0 | 0 | 0 |
| pocs | N/A | postcentral sulcus            | 9371  | 9370 | 6D6E70 | 0 | 0 | 0 | 0 | 0 | 0 |
| pis  | N/A | primary intermediate sulcus   | 9373  | 9370 | 6D6E70 | 0 | 0 | 0 | 0 | 0 | 0 |
| sis  | N/A | secondary intermediate sulcus | 9374  | 9370 | 6D6E70 | 0 | 0 | 0 | 0 | 0 | 0 |
| sbps | N/A | subparietal sulcus            | 9376  | 9370 | 6D6E70 | 0 | 0 | 0 | 0 | 0 | 0 |
| sps  | N/A | superior parietal sulcus      | 9375  | 9370 | 6D6E70 | 0 | 0 | 0 | 0 | 0 | 0 |
| TLs  | N/A | temporal lobe sulci           | 9377  | 9353 | 6D6E70 | 0 | 0 | 0 | 0 | 0 | 0 |
| ans  | N/A | angular sulcus                | 9384  | 9377 | 6D6E70 | 0 | 0 | 0 | 0 | 0 | 0 |
| aoc  | N/A | anterior occipital sulcus     | 9385  | 9377 | 6D6E70 | 0 | 0 | 0 | 0 | 0 | 0 |
| cos  | N/A | collateral sulcus             | 9380  | 9377 | 6D6E70 | 0 | 0 | 0 | 0 | 0 | 0 |
| its  | N/A | inferior temporal sulcus      | 9379  | 9377 | 6D6E70 | 0 | 0 | 0 | 0 | 0 | 0 |
| mts  | N/A | middle temporal sulcus        | 10150 | 9377 | 6D6E70 | 0 | 0 | 0 | 0 | 0 | 0 |
| phr  | N/A | parahippocampal ramus         | 9382  | 9377 | 6D6E70 | 0 | 0 | 0 | 0 | 0 | 0 |
| phs  | N/A | parahippocampal sulcus        | 9381  | 9377 | 6D6E70 | 0 | 0 | 0 | 0 | 0 | 0 |
| rhs  | N/A | rhinal sulcus                 | 9383  | 9377 | 6D6E70 | 0 | 0 | 0 | 0 | 0 | 0 |
| sts  | N/A | superior temporal sulcus      | 9378  | 9377 | 6D6E70 | 0 | 0 | 0 | 0 | 0 | 0 |
| METs | N/A | metencephalic spaces          | 9405  | 9352 | 6D6E70 | 0 | 0 | 0 | 0 | 0 | 0 |
| Cbs  | N/A | cerebellar sulci              | 9406  | 9405 | 6D6E70 | 0 | 0 | 0 | 0 | 0 | 0 |
| prf  | N/A | precentral fissure            | 9407  | 9406 | 6D6E70 | 0 | 0 | 0 | 0 | 0 | 0 |
| pcf  | N/A | preculminate fissure          | 9408  | 9406 | 6D6E70 | 0 | 0 | 0 | 0 | 0 | 0 |

|       |        |                                         |           |           |        |   |   |   |   |   |   |
|-------|--------|-----------------------------------------|-----------|-----------|--------|---|---|---|---|---|---|
| icf   | N/A    | intraculminate fissure                  | 9409      | 9406      | 6D6E70 | 0 | 0 | 0 | 0 | 0 | 0 |
| prif  | N/A    | primary fissure                         | 9410      | 9406      | 6D6E70 | 0 | 0 | 0 | 0 | 0 | 0 |
| spf   | N/A    | superior posterior fissure              | 9411      | 9406      | 6D6E70 | 0 | 0 | 0 | 0 | 0 | 0 |
| hf    | N/A    | horizontal fissure                      | 9412      | 9406      | 6D6E70 | 0 | 0 | 0 | 0 | 0 | 0 |
| apf   | N/A    | ansoparamedian fissure                  | 9413      | 9406      | 6D6E70 | 0 | 0 | 0 | 0 | 0 | 0 |
| pbf   | N/A    | prepyramidal/prebiventer fissure        | 9414      | 9406      | 6D6E70 | 0 | 0 | 0 | 0 | 0 | 0 |
| ibf   | N/A    | intrabiventer fissure                   | 9415      | 9406      | 6D6E70 | 0 | 0 | 0 | 0 | 0 | 0 |
| sfCb  | N/A    | secondary fissure                       | 9416      | 9406      | 6D6E70 | 0 | 0 | 0 | 0 | 0 | 0 |
| plf   | N/A    | posterolateral fissure                  | 9417      | 9406      | 6D6E70 | 0 | 0 | 0 | 0 | 0 | 0 |
| MYs   | N/A    | myelencephalic spaces                   | 265505698 | 9352      | 231F20 | 0 | 0 | 0 | 0 | 0 | 0 |
| aq    | N/A    | cerebral aquaduct                       | 265505702 | 265505698 | 231F20 | 0 | 0 | 0 | 0 | 0 | 0 |
| Vent  | N/A    | ventricles                              | 9418      | 9352      | 231F20 | 0 | 0 | 0 | 0 | 0 | 0 |
| LV    | N/A    | lateral ventricle                       | 9419      | 9418      | 231F20 | 0 | 0 | 0 | 0 | 0 | 0 |
| SP    | N/A    | septum pallucidum                       | 265505706 | 9419      | 6D6E70 | 0 | 0 | 0 | 0 | 0 | 0 |
| *CPLV | **CPLV | choroid plexus of the lateral ventricle | 9708      | 9419      | 872601 | 0 | 0 | 3 | 1 | 0 | 1 |
| 3V    | N/A    | third ventricle                         | 9420      | 9418      | 231F20 | 0 | 0 | 0 | 0 | 0 | 0 |
| CP3V  | N/A    | choroid plexus of the third ventricle   | 9709      | 9420      | 872601 | 0 | 0 | 0 | 0 | 0 | 0 |
| 4V    | N/A    | fourth ventricle                        | 9421      | 9418      | 231F20 | 0 | 0 | 0 | 0 | 0 | 0 |
| CP4V  | N/A    | choroid plexus of the fourth ventricle  | 9710      | 9421      | 872601 | 0 | 0 | 0 | 0 | 0 | 0 |
| CC    | N/A    | central canal                           | 9422      | 9418      | 231F20 | 0 | 0 | 0 | 0 | 0 | 0 |

**Human subregion (62)**

FL  
PL  
TL  
OL  
SIG  
LIG  
CgGf-s  
CgGf-i  
CgGp-s  
CgGp-i  
PHG-I  
PHG-cos  
S  
CA1  
CA2  
CA3  
CA4  
DG  
HCd  
TCd  
Acb  
Pu  
GPi  
CI  
ATZ  
LA  
BLA  
BMA  
CeA  
COMA  
DTA  
ILr  
ILc  
LGd  
DTLd  
DTLv  
MG  
DTM  
DTP

**Mouse counterparts (53)**

FRP, MO, TT, ORB  
PTLp, SS  
TEa, AUD, ECT  
VIS  
AI, GU  
none  
PL, ACA, ILA, ORB  
none  
none  
none  
ENT  
PERI  
SUB, PRE, PAR, POST  
CA1  
CA2  
CA3  
none  
DG  
CP  
CP  
ACB  
CP  
PALd  
CLA  
none  
LA  
BLA  
BMA  
CEA  
COA, MEA  
ATN  
ILM  
ILM  
LGd  
LP, PO  
VENT  
MG  
MED  
POL

|       |                                           |
|-------|-------------------------------------------|
| R     | RT                                        |
| ZI    | ZI                                        |
| Sb    | STN                                       |
| PrOR  | ADP, AVP, AVPV, MEPO, LPO, MPO, MPN, AVPV |
| PHA   | PH                                        |
| SNC   | SNc                                       |
| SNR   | SNr                                       |
| VTA   | CLI, IF, PB, RL                           |
| RN    | RN                                        |
| Pn    | PG                                        |
| PRF   | PRNc, PRNv                                |
| Sp5   | SPVC, SPVI, SPVO                          |
| Arc   | none                                      |
| 8Ve   | VNC                                       |
| Cu    | CU                                        |
| RaM   | My-sat                                    |
| IO    | IO                                        |
| GiRt  | GRN                                       |
| LMRt  | LRN                                       |
| Cb_PV | CBX                                       |
| Cb_He | CBX                                       |
| Dt    | DN                                        |
| cc    | cc                                        |

**Supplementary Table 1. Neuroanatomical sampling overview of the Allen Human Brain Atlas and of each analysis in the manuscript.**

A hierarchical ontology spanning all major architectural subdivisions was created to support the microarray sampling strategy. Each structure in this tree is designated a specific RGB color used throughout this paper. The number of samples isolated from each brain from brain region is shown in the first worksheet, along with a summary of the specific subdivisions sampled and the sample isolation method used (Macro = scalpel macrodissection, LMD = laser microdissection). The complete hierarchical ontology and fine structure sampling for each brain is provided in the second worksheet, collapsed down to a single column (complete version available at the Allen Brain Atlas data portal, or can be reconstructed using the "structure ID" and "parent structure ID" columns). The table contains the structure ID, acronym, hemisphere, color hex triplet, and the number of samples for that structures in brains 1-6. Asterisks (\*) in the "structure acronym" column indicate the 96 brain regions that were sampled sufficiently to be included in the analysis in Figure 6. Additionally, the "subregion for analysis" column specifies the portions of the ontology which were averaged together to form the 132 broad brain structures in the analyses in Figures 2-5. Asterisks (\*) in this column indicate the 65 brain regions sampled across all six brains that were shown in visualizations (\*\* note: CPLV, Pa, and CGS were present in fewer than 6 samples but were also shown in the visualizations to highlight ependymal regions in module M26). The third worksheet shows which mouse structures were matched with each human structures for comparison between species (Figure 6). Structures listed in the "Mouse counterparts" column are structure names from the ontology of the Allen Mouse Brain Atlas. A red "none" indicates that the listed human region did not have comparable structures in mouse. Note that, although cc and RaM had comparable mouse counterparts, ISH quantification was not available for these structures.
